# Supplementary material
Source: PubMed Central journal article supplement (PMC4294458)
Supplement: NIHMS653034-supplement-Supplementary_Data.pdf [file NIHMS653034-supplement-Supplementary_Data.pdf]

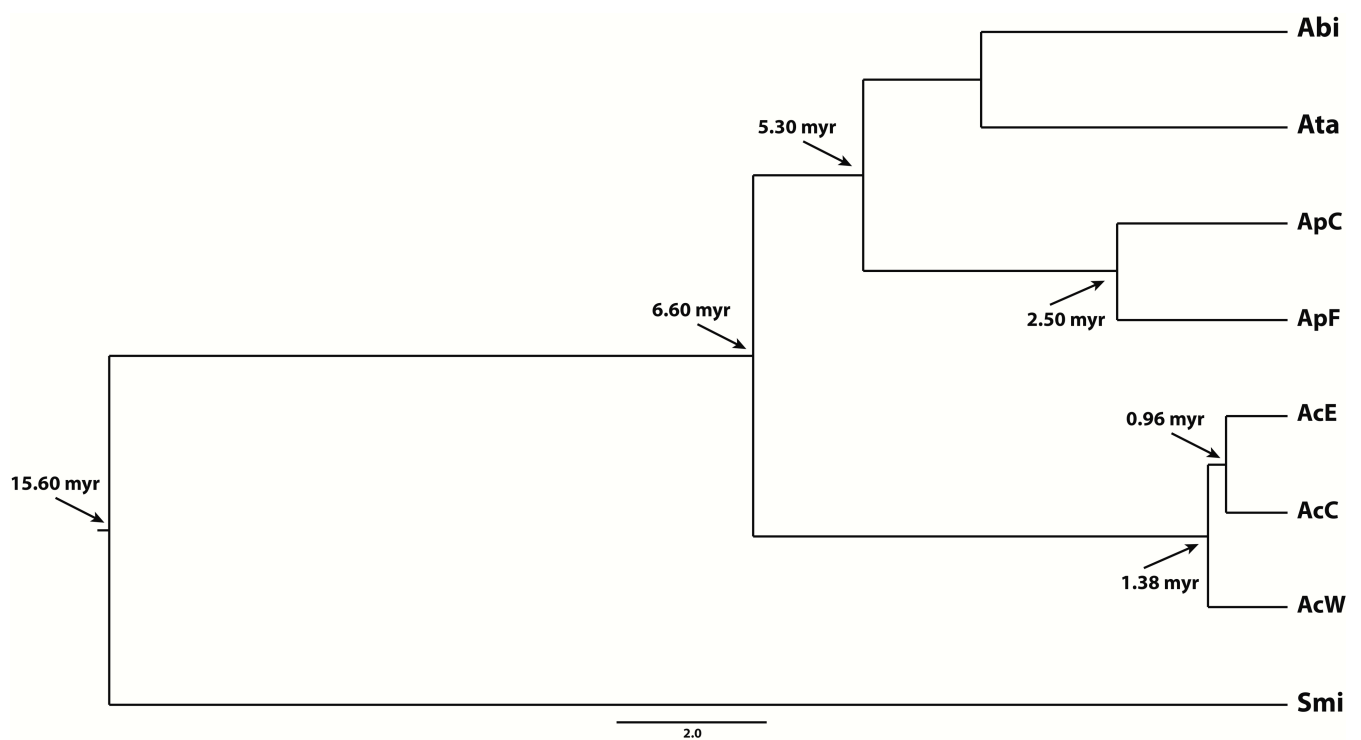

**Figure S1**

Phylogenetic tree used for comparative phylogenetic analysis of venom differentiation in *Agkistrodon*. Data and methods to generate tree are from Guiher and Burbrink [28]. Taxon abbreviations (and analyzed subspecies they represent) are as follows: Abi – *A. bilineatus* (*A. b. howardgloidi* and *A. b. bilineatus*); Ata – *A. taylori*; ApC – *A. piscivorus* Central mtDNA clade (*A. p. piscivorus* and *A. p. leucostoma*); *A. piscivorus* Florida mtDNA clade (*A. p. conanti*); AcE – *A. contortrix* Eastern mtDNA clade (*A. c. contortrix* and *A. c. mokasen*); AcC – *A. contortrix* Central mtDNA clade (*A. c. phaeogaster*); AcW – *A. contortrix* Western mtDNA clade (*A. c. pictigaster* and *A. c. laticinctus*). Divergence dates are from Table 1 in Guiher and Burbrink [28].

Figure 2A

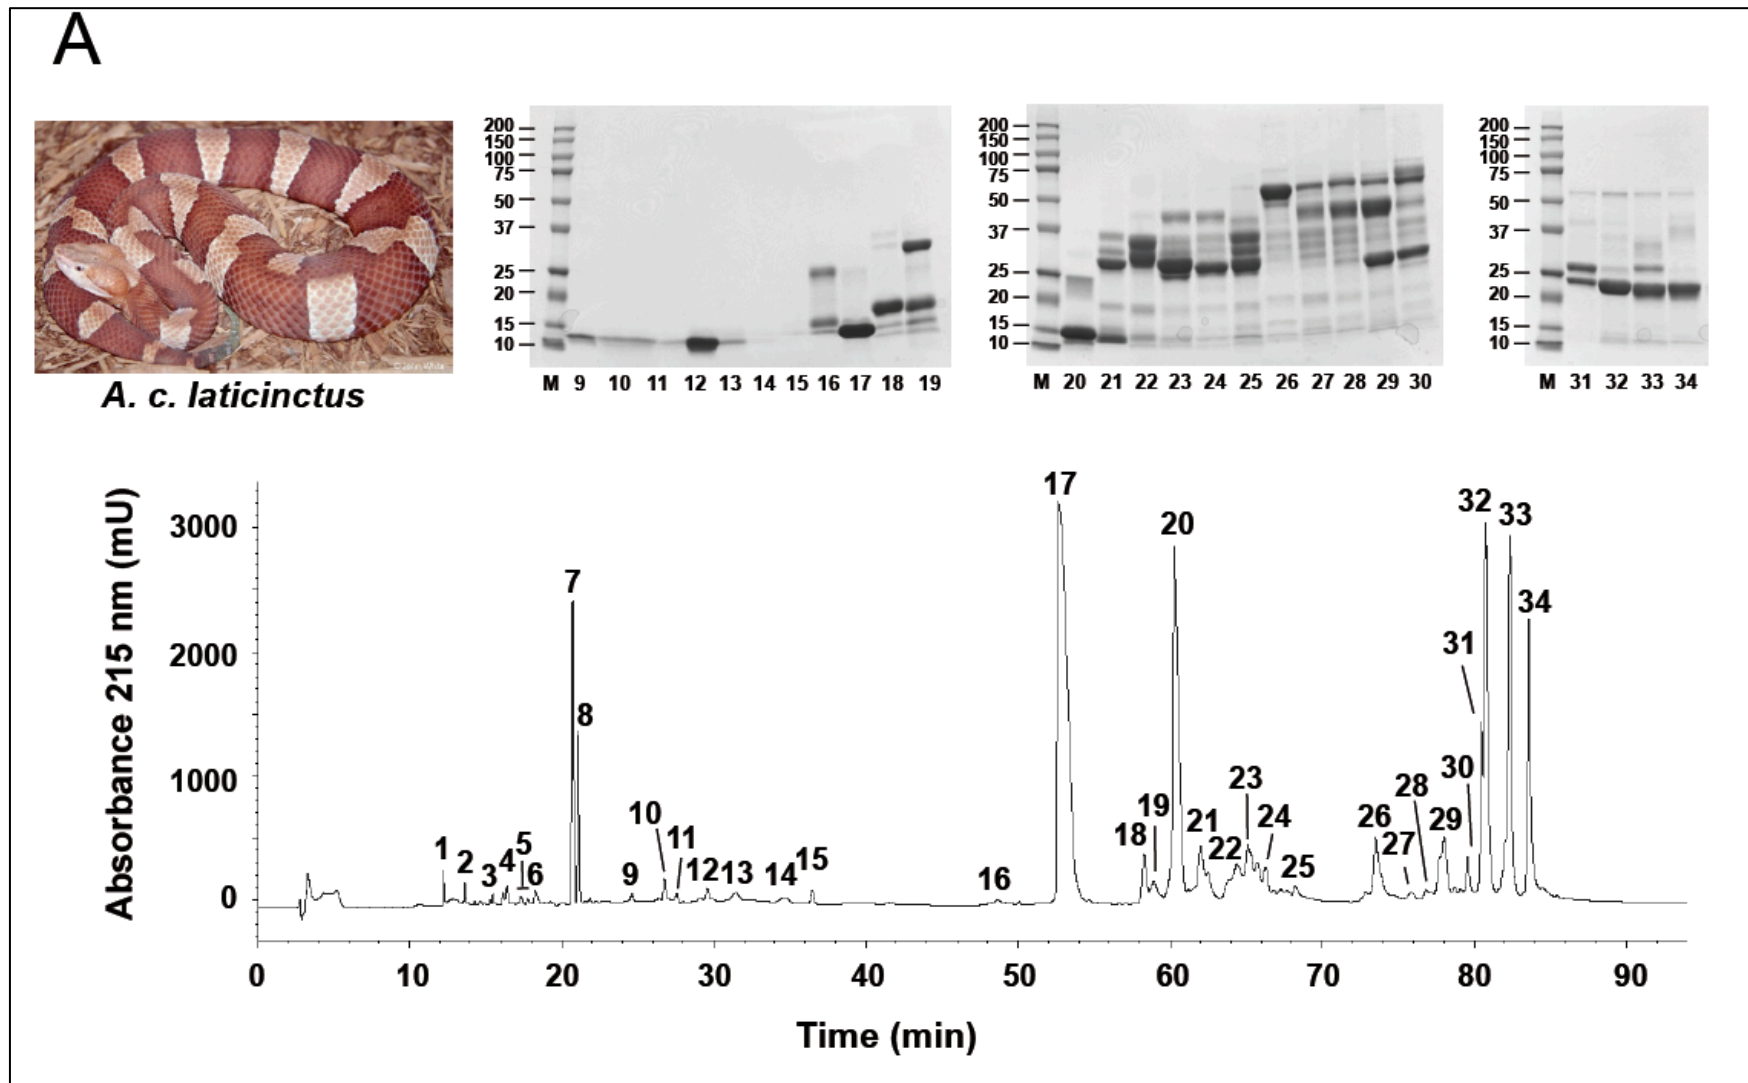

**Table S1:** Assignment of the RP-HPLC isolated fractions of *Agkistrodon contortrix laticinctus* venom to protein families by MALDI-TOF-TOF or nESI-MS-MS of selected peptide ions from in-gel trypsin-digested protein bands from the SDS-PAGE shown in Fig.2A. \* Cysteine residues are carbamidomethylated. X: Leu/Ile; B: Lys/Gln; Z, pyroglutamate (2-oxo-pyrrolidone carboxylic acid). <sup>ox</sup>: oxidized; <sup>da</sup>: deamidated; <sup>cat</sup>: cation; <sup>kyn</sup>: kynurenine. Mass estimations by SDS-PAGE (reducing conditions) are indicated in kDa. Confidence (Conf) and Score (Sc) values are calculated by the Paragon algorithm of ProteinPilot®.

| Peak | %   | Mass, kDa | Peptide ion |   | MS/MS-derived or N-terminal (Nt) sequence | Conf (%) | Sc | Protein family; ~ related protein *   |
|------|-----|-----------|-------------|---|-------------------------------------------|----------|----|---------------------------------------|
|      |     |           | m/z         | z |                                           |          |    |                                       |
| 1    | 0.3 | -         | 385.1       | 1 | TPPA                                      | -        | -  | Bradykinin-inhibitory peptide; P85025 |
| 2    | 0.2 | -         | 449.3       | 1 | ZBW <sup>kyn</sup>                        | -        | -  | SVMP inhibitor; P01021                |
| 3    | 0.1 | -         | -           | - | -                                         | -        | -  | -                                     |
| 4    | 0.3 | -         | 398.8       | 2 | BVTPVPR                                   | -        | -  | Fragment of PI-SVMP; ACV83930         |
| 5    | 0.3 | -         | -           | - | -                                         | -        | -  | -                                     |
| 6    | 0.3 | -         | 865.4       | 1 | PAGPDVGPR                                 | -        | -  | Bradykinin-inhibitory peptide; P85025 |
|      |     |           | 481.7       | 2 | PPAGPDVGPR                                |          |    |                                       |
|      |     |           | 532.3       | 2 | TPPAGPDVGPR                               |          |    |                                       |
| 7    | 3.3 | -         | 452.1       | 1 | ZNW+Na                                    | -        | -  | SVMP inhibitor; P01021                |
|      |     |           | 430.2       | 1 | ZNW                                       |          |    |                                       |
| 8    | 2.0 | -         | 444.1       | 1 | ZBW                                       | -        | -  | SVMP inhibitor; P01021                |
| 9    | 0.2 | 11        | 1983.9      | 1 | XTPGSBCAEGXCCDBCK                         | 99.0     | 6  | Disintegrin; ~ Q805F7                 |
|      |     |           | 1196.5      | 1 | NPCCDAATCK                                | 98.4     | 5  |                                       |
| 10   | 0.5 | 11        |             |   | unknown                                   | -        | -  | -                                     |
| 11   | 0.2 | 10        | 1983.8      | 1 | XTPGSBCAEGXCCDBCK                         | 59.5     | 5  | Disintegrin; ~ Q805F7                 |
| 12   | 0.4 | 10        | 1196.5      | 1 | NPCCDAATCK                                | 99.0     | 10 | Disintegrin; ~ Q805F7                 |
|      |     |           | 1983.9      | 1 | XTPGSBCAEGXCCDBCK                         | 99.0     | 18 |                                       |
| 13   | 0.6 | 10        | -           | - | unknown                                   | -        | -  | -                                     |
| 14   | 0.3 | -         | -           | - | unknown                                   | -        | -  | -                                     |
| 15   | 0.3 | -         | -           | - | unknown                                   | -        | -  | -                                     |
| 16a  | 0.1 | 24        | 1111.6      | 1 | NPNPVPTGCR                                | 86.7     | 6  | Nerve growth factor; Q9DEZ9           |
|      |     |           | 1427.7      | 1 | CRNPNPVPTGCR                              | 82.9     | 7  |                                       |
| 16b  |     | 15        | 1111.6      | 1 | NPNPVPTGCR                                | 99.0     | 10 | Nerve growth factor; Q9DEZ9           |
|      |     |           | 1427.7      | 1 | CRNPNPVPTGCR                              | 99.0     | 10 |                                       |

|        |      |           |        |    |                                                      |      |    |                                              |
|--------|------|-----------|--------|----|------------------------------------------------------|------|----|----------------------------------------------|
| 17     | 26.9 | 14        | 855.4  | 1  | CCFVHK                                               | 97.8 | 7  | Phospholipase A <sub>2</sub> , K49; ~ P49121 |
|        |      |           | 919.5  | 1  | MXXBETGK                                             | 51.2 | 8  |                                              |
| 18     | 1.5  | 17        | 1505.6 | 1  | CCFVHDCCYGK                                          | 99.0 | 18 | Phospholipase A <sub>2</sub> , D49; ~ P51972 |
|        |      |           | 2462.2 | 1  | MDXYTYSVDNGNXVCGGTNPCK                               | 99.0 | 19 |                                              |
| 19a    | 0.5  | 32        | 1129.7 | 1  | FXVAXYTFR                                            | 92.2 | 6  | Serine proteinase; ~ Q9DF68                  |
| 19b    | 0.5  | 18        | 1505.6 | 1  | CCFVHDCCYGK                                          | 99.0 | 17 | Phospholipase A <sub>2</sub> , D49; ~ P51972 |
|        |      |           | 2461.2 | 1  | MDXYTYSVDNGN <sup>da</sup> XVCGGTNPCK                | 99.0 | 13 |                                              |
| 19c    | 0.1  | 15        | 2059.9 | 1  | NAXTSYGSYGCNCGWGHR                                   | 99.0 | 8  | Phospholipase A <sub>2</sub> , D49; ~ P49121 |
|        |      |           | 1505.6 | 1  | CCFVHDCCYGK                                          | 99.0 | 15 |                                              |
| 20a    | 3.8  | 24        | 2509.1 | 1  | SGPPCGDCPSACVNGXCTNPCTK                              | 99.0 | 10 | Serine proteinase; ~ Q7ZTA0                  |
| 20b    | 10.2 | 13        | 2175.9 | 1  | N <sup>da</sup> AXP <sup>ox</sup> FYAFYGCYCGWGGR     | 99.0 | 12 | Phospholipase A <sub>2</sub> , D49; ~ P0C943 |
| 21a    | 0.3  | 34        | 1539.9 | 1  | BVPNEDEBTRVPK                                        | 99.0 | 7  | Serine proteinase; ~ Q91053                  |
| 21b    | 0.3  | 30        | 1307.7 | 1  | NFBMXFGVHSK                                          | 99.0 | 15 | Serine proteinase; ~ Q9YGJ8                  |
|        |      |           | 1512.7 | 1  | VXGGDECNXNEHR                                        | 99.0 | 10 |                                              |
|        |      |           | 2494.3 | 1  | ETYPDVPHCANXNXDHA VCR                                | 99.0 | 13 |                                              |
| 21c    | 1.1  | 26        | 1512.7 | 1  | VXGGDECNXNEHR                                        | 99.0 | 9  | Serine proteinase; ~ O93421                  |
|        |      |           | 1307.7 | 1  | NFBMXFGVHSK                                          | 99.0 | 14 |                                              |
| 21d    | 0.1  | 18        | 1641.9 | 1  | XNXXDYAVCBAAYK                                       | 99.0 | 9  | Serine proteinase; ~ P09872                  |
| 21e    | 1.2  | 12        | 1241.6 | 1  | DFSWEWTD R                                           | 52.8 | 7  | C-type lectin/lectin-like; ~ AER27037        |
| 22a    | 1.2  | 32        | 1512.7 | 1  | VXGGDECNXNEHR                                        | 99.0 | 7  | Serine proteinase; ~ P09872                  |
|        |      |           | 3360.7 | 1  | DTCBGDSGGPXXCNGBFBGXXSVGGNPCABPR                     | 99.0 | 13 |                                              |
|        |      |           | 2250.2 | 1  | NSAHXAPXSXPSNP <sup>ox</sup> P <sup>ox</sup> SVGSVCR | 99.0 | 14 |                                              |
|        |      |           | 2856.4 | 1  | GDSGGPXXCNGBFBGXXSVGGNPCABPR                         | 99.0 | 18 |                                              |
| 22b    | 1.6  | 28        | 1498.7 | 1  | VVGGDECNXNEHR                                        | 99.0 | 12 | Serine proteinase; ~ Q9PTL3                  |
|        |      |           | 1189.7 | 1  | WDBDXMXXR                                            | 99.0 | 14 |                                              |
|        |      |           | 1097.6 | 1  | FXAXVYTDR                                            | 98.9 | 11 |                                              |
| 23a    | 0.6  | 40        | 2233.2 | 1  | DSGGPXXCNGBFBGXVSWG P <sup>ox</sup> K                | 99.0 | 11 | Serine proteinase; ~ Q9PSN3                  |
|        |      |           | 1762.0 | 1  | XXCAGVXEGGXDT CBR                                    | 99.0 | 15 |                                              |
| 23b    | 2.1  | 26        | 1429.7 | 1  | SXPSSPPSVGSVCR                                       | 99.0 | 12 | Serine proteinase; ~ Q8QHK3                  |
|        |      |           | 1190.7 | 1  | XMGWGTXSPTK                                          | 99.0 | 15 |                                              |
|        |      |           | 1824.0 | 1  | XAPXSXPSSPPSVGSVCR                                   | 99.0 | 18 |                                              |
|        |      |           | 1498.7 | 1  | VVGGDECNXNEHR                                        | 99.0 | 12 |                                              |
|        |      |           | 2900.6 | 1  | XDRPVNSAHXAPXSXPSSPPSVGSVCR                          | 99.0 | 22 |                                              |
| 1097.6 | 1    | FXAXVYTDR | 99.0   | 13 |                                                      |      |    |                                              |
| 23c    | 0.6  | 24        | 1498.7 | 1  | VVGGDECNXNEHR                                        | 99.0 | 6  | Serine proteinase; ~ Q9YGJ8                  |

|     |     |     |        |   |                               |      |    |                                     |
|-----|-----|-----|--------|---|-------------------------------|------|----|-------------------------------------|
| 24a | 0.2 | 40  | 1762.0 | 1 | XXCAGVXEGGXDTCBR              | 99.0 | 13 | Serine proteinase; ~ Q9PSN3         |
| 24b | 1.0 | 25  | 1596.9 | 1 | BXXNEDEBXRNP                  | 99.0 | 9  | Serine proteinase; ~ Q8AY79         |
|     |     |     | 1468.8 | 1 | XXNEDEBXRNP                   | 99.0 | 16 |                                     |
|     |     |     | 1498.7 | 1 | VVGGDECXNEHR                  | 99.0 | 9  |                                     |
| 25a | 0.2 | 33  | 1512.7 | 1 | VXGGDECXNEHR                  | 99.0 | 9  | Serine proteinase; ~ P09872         |
|     |     |     | 2857.4 | 1 | GDSGGPXXCNGBFBGXXSVGGNPCABPR  | 99.0 | 15 |                                     |
| 25b | 0.1 | 29  | 2856.5 | 1 | GDSGGPXXCNGBFBGXXSVGGNPCABPR  | 90.4 | 6  | Serine proteinase; ~ P09872         |
| 25c | 0.4 | 25  | 1427.4 | 1 | APYPE <sup>cat</sup> FGXPATSR | 53.8 | 10 | Serine proteinase; ~ Q91053         |
| 25d | 0.1 | 12  | 1187.6 | 1 | NAFXCBCBF                     | 99.0 | 11 | C-type lectin/lectin-like; ~ Q9PSN0 |
| 26  | 3.0 | 51  | 2347.2 | 1 | XYFAGEYTABFHGWXDSTXK          | 99.0 | 22 | L-amino acid oxidase; ~ Q6STF1      |
|     |     |     | 1064.5 | 1 | NPXEFCFR                      | 99.0 | 12 |                                     |
|     |     |     | 1594.8 | 1 | DBEDWYANXGPMR                 | 99.0 | 18 |                                     |
|     |     |     | 1513.8 | 1 | ETNYEEFXEXAR                  | 99.0 | 19 |                                     |
| 27a | 0.2 | 55  | -      | - | unknown                       | -    | -  | -                                   |
| 27b | 0.2 | 42  | 1684.7 | 1 | GABCAEGXCDCBCR                | 73.0 | 6  | Metalloproteinase; ~ P21858         |
| 28a | 0.3 | 57  | -      | - | unknown                       | -    | -  | -                                   |
| 28b | 0.5 | 42  | 1183.7 | 1 | BSNXTPEBBR                    | 99.0 | 11 | Metalloproteinase; ~ Q9DGB9         |
|     |     |     | 1269.6 | 1 | SAECTDRFBR                    | 99.0 | 10 |                                     |
|     |     |     | 1684.7 | 1 | GABCAEGXCDCBCR                | 99.0 | 12 |                                     |
| 29a | 0.1 | 250 | 1733.9 | 1 | MYDXVNVXTPXYHR                | 99.0 | 9  | Metalloproteinase; ~ Q9DGB9         |
|     |     |     | 1803.8 | 1 | YFVEVGEECDGSPR                | 99.0 | 12 |                                     |
|     |     |     | 1368.6 | 1 | XYCFPNSPENK                   | 92.8 | 7  |                                     |
| 29b | 0.4 | 57  | 1594.7 | 1 | DBEDWYANXGPMR                 | 99.0 | 11 | L-amino acid oxidase; ~ Q6STF1      |
|     |     |     | 1064.5 | 1 | NPXEFCFR                      | 99.0 | 9  |                                     |
|     |     |     | 1513.7 | 1 | ETNYEEFXEXAR                  | 99.0 | 15 |                                     |
| 29c | 1.7 | 42  | 1269.6 | 1 | SAECTDRFBR                    | 99.0 | 9  | Metalloproteinase; ~ Q2LD49         |
|     |     |     | 1684.7 | 1 | GABCAEGXCDCBCR                | 99.0 | 17 |                                     |
| 29d | 1.2 | 26  | 2241.2 | 1 | XNFXVAVTMAHEMGHNXGMR          | 99.0 | 9  | Metalloproteinase; ~ Q92032         |
|     |     |     | 1247.6 | 1 | HTXDSFGGEWR                   | 99.0 | 15 |                                     |
|     |     |     | 1532.8 | 1 | HTXDSFGGEWRER                 | 99.0 | 17 |                                     |
| 30a | 0.6 | 58  | 1983.8 | 1 | XTPGSBCADGVCCDCBCR            | 95.4 | 8  | Metalloproteinase; ~ O42138         |
| 30b | 0.2 | 44  | 1983.8 | 1 | XTPGSBCADGVCCDCBCR            | 62.2 | 6  | Metalloproteinase; ~ O42138         |
| 30c | 0.6 | 27  | 1247.6 | 1 | HTXDSFGGEWR                   | 99.0 | 12 | Metalloproteinase; ~ Q92032         |
| 31a | 1.5 | 26  | 1313.8 | 1 | YVEXVXVADHR                   | 99.0 | 14 | Metalloproteinase; ~ Q92043         |

|     |     |    |        |   |                               |      |    |                                |
|-----|-----|----|--------|---|-------------------------------|------|----|--------------------------------|
| 31b | 1.4 | 23 | 1187.6 | 1 | TPEBBGFPBR                    | 99.0 | 14 | Metalloproteinase; ~ Q92031    |
|     |     |    | 2235.2 | 1 | DXXTVTSVSHDTXASFGNWR          | 91.6 | 7  |                                |
| 32a | 0.8 | 55 | 1064.5 | 1 | NPXEECFR                      | 99.0 | 8  | L-amino acid oxidase; ~ P0C2D6 |
|     |     |    | 1513.8 | 1 | ETNYEEFXEXAR                  | 99.0 | 15 |                                |
| 32b | 7.7 | 22 | 2563.5 | 1 | XSHDNABXXTAXEXDGETXGXANR      | 99.0 | 12 | Metalloproteinase; ~ P28891    |
|     |     |    | 3122.6 | 1 | HDNABXXTAXDFDGDVTGXAYVGGMCBXX | 99.0 | 26 |                                |
|     |     |    | 2165.1 | 1 | DYBTFXTVNNPBCXXNBP            | 99.0 | 14 |                                |
|     |     |    | 1313.8 | 1 | YVEXVXVADHR                   | 99.0 | 15 |                                |
|     |     |    | 2506.5 | 1 | BWVHBXVNTXNEXYRPXNXR          | 99.0 | 16 |                                |
| 33a | 0.5 | 55 | 1064.5 | 1 | NPXEECFR                      | 99.0 | 8  | L-amino acid oxidase; ~ P0C2D6 |
|     |     |    | 1513.8 | 1 | ETNYEEFXEXAR                  | 98.9 | 7  |                                |
| 33b | 1.6 | 26 | 1187.6 | 1 | TPEBBGFPBR                    | 99.0 | 10 | Metalloproteinase; ~ Q9IAB0    |
| 33c | 6.9 | 21 | 2297.3 | 1 | BSHDNABXXTAXVFDEGXXGR         | 99.0 | 27 | Metalloproteinase; ~ B7U492    |
|     |     |    | 2169.2 | 1 | SHDNABXXTAXVFDEGXXGR          | 99.0 | 27 |                                |
| 34a | 0.2 | 55 | 1513.8 | 1 | ETNYEEFXEXAR                  | 99.0 | 10 | L-amino acid oxidase; ~ P0C2D6 |
| 34b | 6.5 | 21 | 1201.6 | 1 | APXAGMCDPNR                   | 67.4 | 6  | Metalloproteinase; ~ B7U492    |

---

Figure 2B

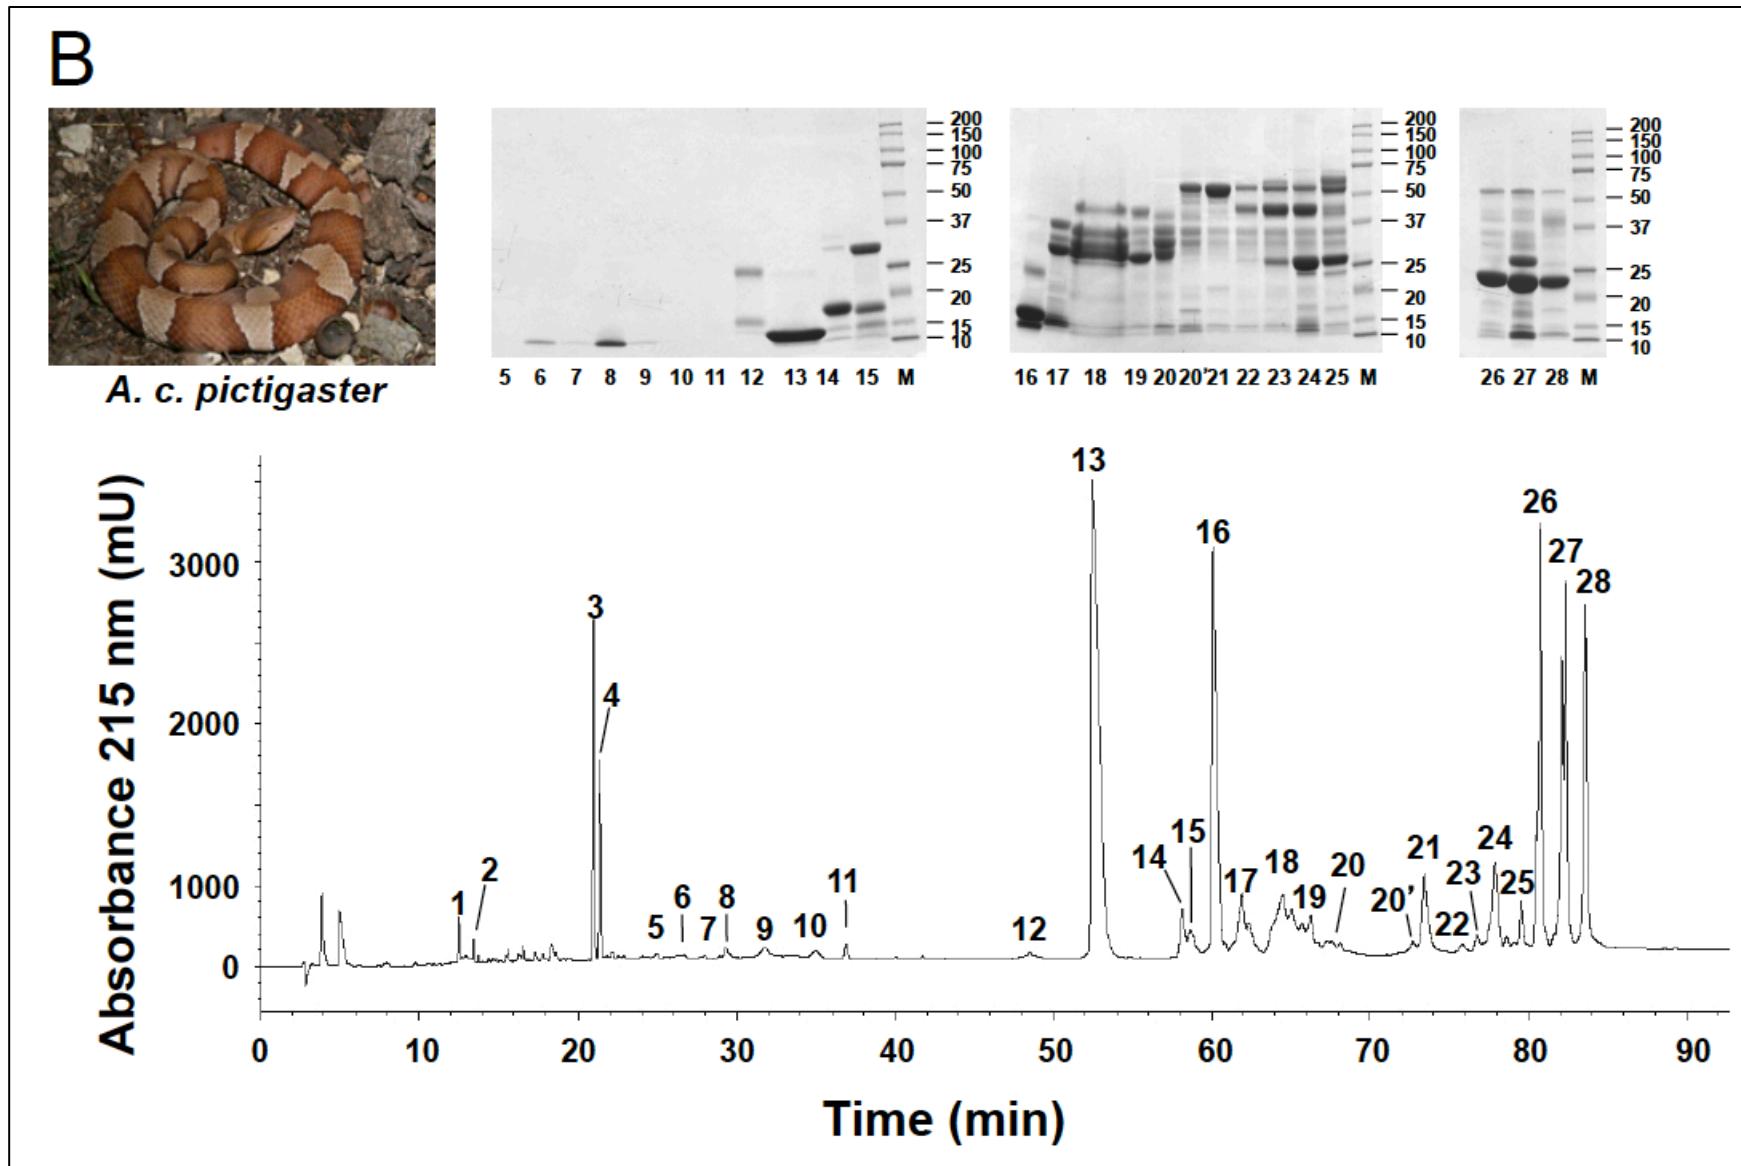

**Table S2:** Assignment of the RP-HPLC isolated fractions of *Agkistrodon contortrix pictigaster* venom to protein families by MALDI-TOF-TOF or nESI-MS-MS of selected peptide ions from in-gel trypsin-digested protein bands from the SDS-PAGE shown in Fig.2B. \* Cysteine residues are carbamidomethylated. X: Leu/Ile; B: Lys/Gln; Z, pyroglutamate (2-oxo-pyrrolidone carboxylic acid). <sup>ox</sup>: oxidized; <sup>da</sup>: deamidated; <sup>dh</sup>: dehydrated; <sup>py</sup>: pyroglutamic; <sup>kyn</sup>: kynurenine. Mass estimations by SDS-PAGE (reducing conditions) are indicated in kDa. Confidence (Conf) and Score (Sc) values are calculated by the Paragon algorithm of ProteinPilot<sup>®</sup>.

| Peak    | %   | Mass, kDa | Peptide ion |   | MS/MS-derived sequence             | Conf (%) | Sc | Protein family; ~ related protein *       |
|---------|-----|-----------|-------------|---|------------------------------------|----------|----|-------------------------------------------|
|         |     |           | m/z         | z |                                    |          |    |                                           |
| 1       | 0.3 | -         | 385.3       | 1 | TPPA                               | -        | -  | Bradykinin-inhibitory peptide; P85025     |
|         |     |           | 470.2       | 1 | ZSPR                               | -        | -  | Fragment of NGF- $\beta$ ; ACC85799       |
| 2       | 0.2 | -         | 532.3       | 2 | TPPAGPDVGPR                        | -        | -  | Bradykinin-inhibitory peptide; P85025     |
| 3       | 3.8 | -         | 430.1       | 1 | ZNW                                | -        | -  | SVMP inhibitor; P01021                    |
|         |     |           | 449.3       | 1 | ZBW <sup>kyn</sup>                 | -        | -  | SVMP inhibitor; P01021                    |
|         |     |           | 624.4       | 2 | BSGPBNDTAA(278.2)                  | -        | -  | Fragment of PLA <sub>2</sub> ; ~ AAP48902 |
| 3b      | -   | -         | 468.3       | 1 | PVPR                               | -        | -  | Fragment of PI-SVMP; ACV83930             |
|         |     |           | 569.2       | 1 | TPVPR                              | -        | -  | Fragment of PI-SVMP; ACV83930             |
|         |     |           | 668.5       | 1 | VTPVPR                             | -        | -  | Fragment of PI-SVMP; ACV83930             |
|         |     |           | 398.8       | 2 | KVTPVPR                            | -        | -  | Fragment of PI-SVMP; ACV83930             |
| 3c,d    | -   | -         | 532.3       | 2 | TPPAGPDVGPR                        | -        | -  | Bradykinin-inhibitory peptide; P85025     |
| 4       | 2.4 | -         | 444.1       | 1 | ZBW                                | -        | -  | SVMP inhibitor; P01021                    |
|         |     |           | 466.1       | 1 | ZBW + Na                           | -        | -  | SVMP inhibitor; P01021                    |
| 5<br>5c | 0.2 | -         | 638.8       | 2 | ZBWPPGHHIPP                        | -        | -  | Bradykinin-potentiating peptide; ~ P0C7J9 |
|         |     |           | 534.8       | 2 | ZNXPHPWPP                          | -        | -  | Bradykinin-potentiating peptide; ~ Q27J49 |
| 6       | 0.4 | 9         | 1196.5      | 1 | NPCCDAATCK                         | 99.0     | 6  | Disintegrin; ~ P16338                     |
|         |     |           | 2098.0      | 1 | ARGDDVN <sup>da</sup> DYCNGXSAGCPR | 99.0     | 9  |                                           |
|         |     |           | 1870.9      | 1 | GDDVN <sup>da</sup> DYCNGXSAGCPR   | 99.0     | 8  |                                           |
|         |     |           | 1967.9      | 1 | XTPGABCAEGXCCDBCK                  | 99.0     | 8  |                                           |
| 7       | 0.2 | -         | -           | - | unknown                            | -        | -  |                                           |
| 8       | 0.4 | 9         | 1196.5      | 1 | NPCCDAATCK                         | 99.0     | 10 | Disintegrin; ~ P16338                     |
|         |     |           | 1870.9      | 1 | GDDVN <sup>da</sup> DYCNGXSAGCPR   | 99.0     | 8  |                                           |
|         |     |           | 2098.0      | 1 | ARGDDVN <sup>da</sup> DYCNGXSAGCPR | 99.0     | 13 |                                           |
|         |     |           | 1983.9      | 1 | XTPGSBCAEGXCCDBCK                  | 99.0     | 9  |                                           |
| 9       | 0.6 | -         | -           | - | unknown                            | -        | -  |                                           |



|     |      |    |        |   |                                                       |      |    |                                              |
|-----|------|----|--------|---|-------------------------------------------------------|------|----|----------------------------------------------|
| 10  | 0.4  | -  | -      | - | unknown                                               | -    | -  | -                                            |
| 11  | 0.3  | -  | -      | - | unknown                                               | -    | -  | -                                            |
| 12a | 0.1  | 23 | 1111.6 | 1 | NPNPVPTGCR                                            | 99.0 | 8  | Nerve growth factor; ~ Q90W38                |
|     |      |    | 1758.9 | 1 | HWNSYCTTTNTFVK                                        | 99.0 | 20 |                                              |
|     |      |    | 1363.7 | 1 | AXTMEGNBASWR                                          | 99.0 | 11 |                                              |
| 12b | 0.1  | 15 | 1111.6 | 1 | NPNPVPTGCR                                            | 99.0 | 9  | Nerve growth factor; ~ Q90W38                |
|     |      |    | 1992.1 | 1 | GNVVTVMVDVNXNNNVYK                                    | 99.0 | 7  |                                              |
|     |      |    | 1758.9 | 1 | HWNSYCTTTNTFVK                                        | 99.0 | 18 |                                              |
|     |      |    | 1363.7 | 1 | AXTMEGNBASWR                                          | 99.0 | 10 |                                              |
|     |      |    | 962.5  | 1 | BYFFETK                                               | 98.9 | 6  |                                              |
| 13  | 24.9 | 13 | 1474.8 | 1 | AXXCEEENPCXK                                          | 99.0 | 17 | Phospholipase A <sub>2</sub> , K49; ~ P49121 |
|     |      |    | 1754.9 | 1 | EMCECDBAVAXCXR                                        | 99.0 | 17 |                                              |
|     |      |    | 1205.6 | 1 | TDRYSYSWK                                             | 99.0 | 14 |                                              |
|     |      |    | 2060.0 | 1 | NAXTSYGSYGCNCGWGHR                                    | 99.0 | 20 |                                              |
|     |      |    | 919.5  | 1 | MXXBETGK                                              | 97.3 | 9  |                                              |
|     |      |    | 850.4  | 1 | CCFVHK                                                | 97.3 | 7  |                                              |
|     |      |    | 1408.7 | 1 | DATDRCCFVHK                                           | 95.5 | 6  |                                              |
| 14  | 1.5  | 17 | 1505.6 | 1 | CCFVHDCCYGK                                           | 99.0 | 15 | Phospholipase A <sub>2</sub> , D49; ~ P51972 |
|     |      |    | 2461.2 | 1 | MD <sup>dh</sup> XYTYSVDNGN <sup>da</sup> XVCGGTNPCK  | 99.0 | 16 |                                              |
|     |      |    | 2589.3 | 1 | MD <sup>dh</sup> XYTYSVDNGN <sup>da</sup> XVCGGTNPCBK | 99.0 | 20 |                                              |
| 15a | 0.6  | 29 | 1683.0 | 1 | TYTBWDBDXMXXR                                         | 99.0 | 12 | Serine proteinase; ~ Q7T229                  |
|     |      |    | 1526.8 | 1 | XXGGDECXNEHR                                          | 99.0 | 9  |                                              |
|     |      |    | 2515.3 | 1 | FHCSGTXXNBEWVXTAANCDR                                 | 99.0 | 10 |                                              |
|     |      |    | 1975.1 | 1 | HXAPXSXPSSPPTVGSVCR                                   | 99.0 | 18 |                                              |
|     |      |    | 2135.2 | 1 | SAHXAP <sup>ox</sup> XXPSSPPSVGSVCR                   | 99.0 | 14 |                                              |
|     |      |    | 1129.7 | 1 | FXVAXYTFR                                             | 99.0 | 12 |                                              |
|     |      |    | 1189.7 | 1 | WDBDXMXXR                                             | 98.1 | 12 |                                              |
| 15b | 0.4  | 17 | 1505.6 | 1 | CCFVHDCCYGK                                           | 99.0 | 14 | Phospholipase A <sub>2</sub> , D49; ~ P51972 |
|     |      |    | 2461.2 | 1 | MD <sup>dh</sup> XYTYSVDNGN <sup>da</sup> XVCGGTNPCK  | 99.0 | 12 |                                              |
|     |      |    | 2589.3 | 1 | MD <sup>dh</sup> XYTYSVDNGN <sup>da</sup> XVCGGTNPCBK | 99.0 | 16 |                                              |
| 15c | 0.2  | 14 | 1505.6 | 1 | CCFVHDCCYGK                                           | 99.0 | 11 | Phospholipase A <sub>2</sub> , D49; ~ P86169 |
| 16a | 2.0  | 23 | 1325.6 | 1 | SXVBBYGCBDK                                           | 99.0 | 7  | CRISP; ~ Q7ZTA0                              |
|     |      |    | 1976.0 | 1 | SVDFDSESPRBPEXBNK                                     | 99.0 | 4  |                                              |
|     |      |    | 1537.7 | 1 | MEWYPEAAANAER                                         | 99.0 | 10 |                                              |
|     |      |    | 1066.6 | 1 | XVDXHNSXR                                             | 98.9 | 10 |                                              |
| 16b | 7.9  | 15 | 1505.6 | 1 | CCFVHDCCYGK                                           | 99.0 | 18 | Phospholipase A <sub>2</sub> , D49; ~ P51972 |
|     |      |    | 2461.2 | 1 | MD <sup>dh</sup> XYTYSVDNGN <sup>da</sup> XVCGGTNPCK  | 99.0 | 14 |                                              |
|     |      |    | 2589.3 | 1 | MD <sup>dh</sup> XYTYSVDNGN <sup>da</sup> XVCGGTNPCBK | 99.0 | 16 |                                              |
|     |      |    | 2176.0 | 1 | N <sup>da</sup> AXP <sup>ox</sup> FYAFYGCYCGWGGR      | 99.0 | 12 |                                              |

|     |     |    |        |   |                                                       |      |    |                                              |
|-----|-----|----|--------|---|-------------------------------------------------------|------|----|----------------------------------------------|
| 16c | 3.3 | 12 | 1505.6 | 1 | CCFVHDCCYGK                                           | 99.0 | 18 | Phospholipase A <sub>2</sub> , D49; ~ P51972 |
|     |     |    | 1859.9 | 1 | AAAXCFRDNXDTYN <sup>da</sup> SK                       | 99.0 | 19 |                                              |
|     |     |    | 2589.3 | 1 | MD <sup>dh</sup> XYTYSVDNGN <sup>da</sup> XVCGGTNPCBK | 99.0 | 17 |                                              |
|     |     |    | 2176.0 | 1 | N <sup>da</sup> AXP <sup>ox</sup> FYAFYGCYCGWGGR      | 99.0 | 13 |                                              |
| 17a | 2.4 | 28 | 1585.9 | 1 | BXXNEDEBTRDPK                                         | 99.0 | 11 | Serine proteinase; ~ Q9YGJ8                  |
|     |     |    | 2508.3 | 1 | ETYPDVPHCANXNXXDHAVCR                                 | 99.0 | 17 |                                              |
|     |     |    | 1747.0 | 1 | BBDDEBDBDXMXXR                                        | 99.0 | 18 |                                              |
|     |     |    | 1323.7 | 1 | NFBM <sup>ox</sup> XFGVHSK                            | 99.0 | 18 |                                              |
|     |     |    | 1512.8 | 1 | VXGGDECXNEHR                                          | 99.0 | 9  |                                              |
|     |     |    | 1307.7 | 1 | NFBMXFGVHSK                                           | 99.0 | 18 |                                              |
| 17b | 1.3 | 15 | 2413.2 | 1 | SCTDYXTWDBNBPDPHYBNK                                  | 99.0 | 14 | C-type lectin/lectin-like; ~ Q9PSN0          |
|     |     |    | 3342.7 | 1 | YBPGCHXASFHBYGESXEXAEYXSDYHK                          | 99.0 | 16 |                                              |
|     |     |    | 1278.6 | 1 | XWNDBVCESK                                            | 99.0 | 15 |                                              |
|     |     |    | 1401.8 | 1 | GBAEVWXGXWDK                                          | 99.0 | 19 |                                              |
|     |     |    | 1572.8 | 1 | EFCVEXVSXTGYR                                         | 99.0 | 18 |                                              |
|     |     |    | 1241.6 | 1 | DFSWEWTDR                                             | 99.0 | 13 |                                              |
|     |     |    | 1519.8 | 1 | NVGVBPVVPDNP                                          | 99.0 | 12 |                                              |
| 18a | 0.9 | 42 | 2317.3 | 1 | NSEHXAPXSXPSSPPXVGSVCR                                | 99.0 | 15 | Serine proteinase; ~ Q9PSN3                  |
|     |     |    | 1512.7 | 1 | VXGGDECXNEHR                                          | 99.0 | 9  |                                              |
|     |     |    | 2217.1 | 1 | DSGGPXXCNGBFBGXVSWGPK                                 | 99.0 | 8  |                                              |
|     |     |    | 1762.0 | 1 | XXCAGVXEGGXDTCBR                                      | 99.0 | 9  |                                              |
|     |     |    | 1189.7 | 1 | WDBDXMXXR                                             | 99.0 | 11 |                                              |
| 18b | 1.1 | 33 | 1512.7 | 1 | VXGGDECXNEHR                                          | 99.0 | 8  | Serine proteinase; ~ P09872                  |
|     |     |    | 2856.5 | 1 | GDSGGPXXCNGBFBGXVSGGNPCABPR                           | 99.0 | 15 |                                              |
| 18c | 2.1 | 28 | 1189.7 | 1 | WDBDXMXXR                                             | 99.0 | 13 | Serine proteinase; ~ Q71QI3                  |
|     |     |    | 1097.7 | 1 | FXAXVYTDR                                             | 99.0 | 9  |                                              |
| 18d | 0.5 | 13 | 1278.6 | 1 | XWNDBVCESK                                            | 99.0 | 7  | C-type lectin/lectin-like; ~ Q9PSM4          |
|     |     |    | 1401.8 | 1 | GBAEVWXGXWDK                                          | 99.0 | 14 |                                              |
|     |     |    | 1572.8 | 1 | EFCVEXVSXTGYR                                         | 99.0 | 14 |                                              |
|     |     |    | 1241.6 | 1 | DFSWEWTDR                                             | 96.0 | 7  |                                              |
| 19a | 0.5 | 42 | 1512.7 | 1 | VXGGDECXNEHR                                          | 99.0 | 11 | Serine proteinase; ~ Q9PSN3                  |
|     |     |    | 1762.0 | 1 | XXCAGVXEGGXDTCBR                                      | 99.0 | 11 |                                              |
|     |     |    | 2217.2 | 1 | DSGGPXXCNGBFBGXVSWGPK                                 | 99.0 | 16 |                                              |
|     |     |    | 2317.3 | 1 | NSEHXAPXSXPSSPPXVGSVCR                                | 99.0 | 19 |                                              |
| 19b | 1.0 | 27 | 1468.8 | 1 | XXNEDEBXRNP                                           | 99.0 | 15 | Serine proteinase; ~ Q8AY79                  |
|     |     |    | 1596.9 | 1 | BXXNEDEBXRNP                                          | 99.0 | 17 |                                              |
|     |     |    | 1498.7 | 1 | VVGGDECXNEHR                                          | 99.0 | 11 |                                              |
|     |     |    | 2866.6 | 1 | FXAXVYANGSXCGGTXXNBEWVXTAR                            | 99.0 | 12 |                                              |

|        |     |                      |        |     |                              |        |    |                                     |                                |
|--------|-----|----------------------|--------|-----|------------------------------|--------|----|-------------------------------------|--------------------------------|
| 20     | 0.6 | 13                   | 1401.8 | 1   | GBAEVWXGXWDK                 | 99.0   | 13 | C-type lectin/lectin-like; ~ Q9PSM4 |                                |
|        |     |                      | 1572.8 | 1   | EFCVEXVSXTGYR                | 99.0   | 14 |                                     |                                |
|        |     |                      | 1241.6 | 1   | DFSWEWTDNR                   | 99.0   | 10 |                                     |                                |
|        |     |                      | 1278.6 | 1   | XWNDBVCESK                   | 98.6   | 7  |                                     |                                |
| 20'a   | 0.1 | 54                   | 2169.2 | 1   | SHDNABXXTAXVFDEGXXGR         | 99.0   | 12 | Metalloproteinase; ~ B7U492         |                                |
|        |     |                      | 1165.7 | 1   | XBFEPPXPPK                   | 99.0   | 10 | L-amino acid oxidase; ~ Q6STF1      |                                |
|        |     |                      | 1064.5 | 1   | NPXEECFR                     | 99.0   | 11 |                                     |                                |
|        |     |                      | 2347.2 | 1   | XYFAGEYTABFHGWXDSTXK         | 99.0   | 15 |                                     |                                |
|        |     |                      | 1594.8 | 1   | DBEDWYANXGPMR                | 99.0   | 12 |                                     |                                |
| 20'b   | <   | 38                   | 1123.5 | 1   | HDDXFGYEK                    | 99.0   | 10 |                                     | L-amino acid oxidase; ~ P56742 |
|        |     |                      | 2347.2 | 1   | XYFAGEYTABFHGWXDSTXK         | 99.0   | 7  |                                     |                                |
| 20'c   | 0.1 | 34                   | 1064.5 | 1   | NPXEECFR                     | 97.1   | 7  | L-amino acid oxidase; ~ Q90W54      |                                |
|        |     |                      | 2856.4 | 1   | GDSGGPXXCNGBFBGXXSVGGNPCABPR | 99.0   | 15 |                                     | Serine proteinase; ~ P09872    |
| 20'd   | 0.1 | 30                   | 1064.5 | 1   | NPXEECFR                     | 99.0   | 8  | L-amino acid oxidase; ~ P0C2D6      |                                |
|        |     |                      | 1513.7 | 1   | ETNYEEFXEXAR                 | 99.0   | 16 |                                     |                                |
| 20'e   | 0.1 | 17                   | 1507.8 | 1   | VVGGRPCNXNEHR                | 99.0   | 11 | Serine proteinase; ~ Q9YGJ8         |                                |
|        |     |                      | 1498.7 | 1   | VVGGDECNXNEHR                | 99.0   | 9  |                                     |                                |
| 20'f   | 0.1 | 13                   | 1401.7 | 1   | GBAEVWXGXWDK                 | 99.0   | 16 | C-type lectin/lectin-like; ~ Q9PSM4 |                                |
|        |     |                      | 1572.8 | 1   | EFCVEXVSXTGYR                | 99.0   | 10 |                                     |                                |
|        |     |                      | 1241.5 | 1   | DFSWEWTDNR                   | 99.0   | 12 |                                     |                                |
|        |     |                      | 1064.5 | 1   | NPXEECFR                     | 99.0   | 7  |                                     | L-amino acid oxidase; ~ P0C2D6 |
|        |     |                      | 1513.7 | 1   | ETNYEEFXEXAR                 | 99.0   | 10 |                                     |                                |
|        |     |                      | 21     | 3.0 | 52                           | 2953.5 | 1  |                                     |                                |
| 1064.5 | 1   | NPXEECFR             |        |     |                              | 99.0   | 10 |                                     |                                |
| 1594.8 | 1   | DBEDWYANXGPMR        |        |     |                              | 99.0   | 15 |                                     |                                |
| 2347.2 | 1   | XYFAGEYTABFHGWXDSTXK |        |     |                              | 99.0   | 20 |                                     |                                |
| 1513.7 | 1   | ETNYEEFXEXAR         |        |     |                              | 99.0   | 19 |                                     |                                |
| 22a    | 0.1 | 54                   | 2347.2 | 1   | XYFAGEYTABFHGWXDSTXK         | 99.0   | 8  | L-amino acid oxidase; ~ P56742      |                                |
|        |     |                      | 1513.8 | 1   | ETNYEEFXEXAR                 | 99.0   | 9  |                                     |                                |
| 22b    | 0.3 | 42                   | 1368.7 | 1   | XYCFPNSPENK                  | 99.0   | 7  | Metalloproteinase; ~ Q9DGB9         |                                |
|        |     |                      | 1684.7 | 1   | GABCAEGXCDBCRCR              | 99.0   | 8  |                                     |                                |
|        |     |                      | 2929.4 | 1   | TDVVSPA VCGNYFVEVGEECDGSPR   | 99.0   | 12 |                                     |                                |
|        |     |                      | 1137.5 | 1   | E <sup>Py</sup> GNHYGYCR     | 99.0   | 8  |                                     |                                |
|        |     |                      | 1734.0 | 1   | MYDXVNVXTPXYHR               | 99.0   | 11 |                                     |                                |
| 23a    | 0.4 | 54                   | 1594.8 | 1   | DBEDWYANXGPMR                | 99.0   | 10 | L-amino acid oxidase; ~ Q6STF1      |                                |
|        |     |                      | 2347.2 | 1   | XYFAGEYTABFHGWXDSTXK         | 99.0   | 13 |                                     |                                |

|     |     |    |        |   |                                     |      |    |                                     |
|-----|-----|----|--------|---|-------------------------------------|------|----|-------------------------------------|
|     |     |    | 1513.7 | 1 | ETNYEEFXEXAR                        | 99.0 | 10 |                                     |
|     |     |    | 1064.5 | 1 | NPXEECFR                            | 98.6 | 7  |                                     |
| 23b | 0.2 | 42 | 1733.9 | 1 | MYDXVNVXTPXYHR                      | 99.0 | 18 | Metalloproteinase; ~ Q9DGB9         |
| 24a | 0.6 | 54 | 2347.2 | 1 | XYFAGEYTABFHGWXDSTXK                | 99.0 | 10 | L-amino acid oxidase; ~ P56742      |
|     |     |    | 1513.8 | 1 | ETNYEEFXEXAR                        | 99.0 | 14 |                                     |
|     |     |    | 1064.5 | 1 | NPXEECFR                            | 95.2 | 7  |                                     |
| 24b | 1.4 | 42 | 1368.7 | 1 | XYCFPNSPENK                         | 99.0 | 8  | Metalloproteinase; ~ Q9DGB9         |
|     |     |    | 1734.0 | 1 | MYDXVNVXTPXYHR                      | 99.0 | 16 |                                     |
|     |     |    | 1684.7 | 1 | GABCAEGXCDCBCR                      | 99.0 | 11 |                                     |
|     |     |    | 1440.8 | 1 | XVXVADYXM <sup>ox</sup> FXX         | 99.0 | 14 |                                     |
|     |     |    | 2929.4 | 1 | TDVVSPAFCGNFYFVEVGEECDGSPR          | 99.0 | 14 |                                     |
|     |     |    | 1137.5 | 1 | E <sup>py</sup> GNHYGYCR            | 96.5 | 7  |                                     |
| 24c | 1.7 | 26 | 1401.7 | 1 | BWVHBMVNTMK                         | 99.0 | 11 | Metalloproteinase; ~ Q92032         |
|     |     |    | 1097.6 | 1 | DXXDVBPAAR                          | 99.0 | 10 |                                     |
|     |     |    | 3337.8 | 1 | XSHDNABXXTSTDFDGPTXGXAYVGTMCDPK     | 99.0 | 21 |                                     |
|     |     |    | 2717.2 | 1 | HDTGSCSCGGYSCXMSPVXSDDSPK           | 99.0 | 18 |                                     |
|     |     |    | 3080.7 | 1 | YMYXDXXSAGVEXWSNBDXXDVBPAAR         | 99.0 | 15 |                                     |
|     |     |    | 2257.2 | 1 | XNFXVAVTM <sup>ox</sup> AHEMGHNXGMR | 99.0 | 19 |                                     |
|     |     |    | 1754.0 | 1 | YVEXVTVVDHGMYSK                     | 99.0 | 22 |                                     |
|     |     |    | 2241.2 | 1 | XNFXVAVTMAHEMGHNXGMR                | 99.0 | 12 |                                     |
|     |     |    | 1247.6 | 1 | HTXDSFGEWR                          | 99.0 | 17 |                                     |
| 24d | 0.2 | 12 | 3080.7 | 1 | YMYXDXXSAGVEXWSNBDXXDVBPAAR         | 99.0 | 13 | Metalloproteinase; ~ Q92032         |
|     |     |    | 2002.0 | 1 | YMYXDXXSAGVEXWSNK                   | 99.0 | 10 |                                     |
|     |     |    | 1753.9 | 1 | YVEXVTVVDHGMYSK                     | 99.0 | 18 |                                     |
|     |     |    | 1247.6 | 1 | HTXDSFGEWR                          | 99.0 | 17 |                                     |
|     |     |    | 1097.6 | 1 | DXXDVBPAAR                          | 96.5 | 10 |                                     |
|     |     |    | 1572.8 | 1 | EFCVEXVSXTGYR                       | 99.0 | 9  | C-type lectin/lectin-like; ~ Q9PSN0 |
| 25a | 0.3 | 60 | 1800.0 | 1 | YVEFVVVDHGMYSK                      | 99.0 | 6  | Metalloproteinase; ~ O42138         |
|     |     |    | 2141.2 | 1 | SHDNABXXTVXDFDGPTXGK                | 99.0 | 17 |                                     |
|     |     |    | 1714.9 | 1 | Q <sup>py</sup> XNXTPEBBAYXDAK      | 99.0 | 13 |                                     |
| 25b | 0.2 | 53 | 1064.5 | 1 | NPXEECFR                            | 99.0 | 7  | L-amino acid oxidase; ~ Q6STF1      |
|     |     |    | 2347.2 | 1 | XYFAGEYTABFHGWXDSTXK                | 99.0 | 10 |                                     |
|     |     |    | 1594.8 | 1 | DBEDWYANXGPMR                       | 99.0 | 13 |                                     |
|     |     |    | 1513.8 | 1 | ETNYEEFXEXAR                        | 99.0 | 7  |                                     |
| 25c | 0.2 | 41 | 2856.4 | 1 | GDSGGPXXCNGBFBGXXSVGGNPCABPR        | 99.0 | 11 | Serine proteinase; ~ P09872         |
|     |     |    | 1512.7 | 1 | VXGGDECXNEHR                        | 99.0 | 6  |                                     |
| 25d | 0.4 | 26 | 1384.7 | 1 | Q <sup>py</sup> WVHBMVNTMK          | 99.0 | 11 | Metalloproteinase; ~ Q92032         |
|     |     |    | 1401.7 | 1 | BWVHBMVNTMK                         | 99.0 | 8  |                                     |

|     |     |    |        |   |                                       |              |         |                                |
|-----|-----|----|--------|---|---------------------------------------|--------------|---------|--------------------------------|
|     |     |    | 1247.6 | 1 | HTXDSFGGEWR                           | 99.0         | 7       |                                |
|     |     |    | 1313.8 | 1 | YVEXVXVADHR                           | 99.0         | 11      |                                |
| 26a | 2.0 | 57 | 2347.2 | 1 | XYFAGEYTABFHGWXDSTXK                  | 99.0         | 9       | L-amino acid oxidase; ~ P56742 |
|     |     |    | 1513.7 | 1 | ETNYEEFXEXAR                          | 99.0         | 10      |                                |
| 26b | 6.3 | 24 | 3122.6 | 1 | HDNABXXTAXDFDGDVTGXAYVGGMCBXX         | 99.0         | 25      | Metalloproteinase; ~ Q92031    |
|     |     |    | 2564.4 | 1 | XSHDNABXXTAXEXDGETXGXANR              | 99.0         | 13      |                                |
|     |     |    | 1067.5 | 1 | YNGDSDBXR                             | 99.0         | 9       |                                |
|     |     |    | 1187.6 | 1 | TPEBBGFPBR                            | 99.0         | 14      |                                |
|     |     |    | 2219.2 | 1 | DXXTVTSVSHDTXASFGNWR                  | 99.0         | 16      |                                |
|     |     |    | 2293.3 | 1 | BDYBTFXTVNNPBCXXNBP                   | 99.0         | 17      |                                |
|     |     |    | 2165.1 | 1 | DYBTFXTVNNPBCXXNBP                    | 99.0         | 16      |                                |
|     |     |    | 2489.5 | 1 | Q <sup>py</sup> WVHBXVNTXNEXYRPXNXR   | 99.0         | 11      |                                |
|     |     |    | 2506.5 | 1 | BWVHBXVNTXNEXYRPXNXR                  | 99.0         | 14      |                                |
|     |     |    | 1313.8 | 1 | YVEXVXVADHR                           | 99.0         | 15      |                                |
| 26c | 1.4 | 12 | 1313.8 | 1 | YVEXVXVADHR                           | 99.0         | 9       | Metalloproteinase; ~ Q92043    |
| 27a | 2.2 | 56 | 1165.7 | 1 | XBFEPPXPPK                            | 99.0         | 6       | L-amino acid oxidase; ~ Q6STF1 |
|     |     |    | 1064.5 | 1 | NPXEECFR                              | 99.0         | 7       |                                |
|     |     |    | 1594.8 | 1 | DBEDWYANXGPMR                         | 99.0         | 12      |                                |
|     |     |    | 2347.2 | 1 | XYFAGEYTABFHGWXDSTXK                  | 99.0         | 12      |                                |
|     |     |    | 1513.7 | 1 | ETNYEEFXEXAR                          | 99.0         | 10      |                                |
| 27b | 2.8 | 28 | 1187.6 | 1 | TPEBBGFPBR                            | 99.0         | 15      | Metalloproteinase; ~ Q92031    |
|     |     |    | 1313.7 | 1 | YVEXVXVADHR                           | 99.0         | 14      |                                |
| 27c | 4.4 | 23 | 1187.6 | 1 | TPEBBGFPBR                            | 99.0         | 12      | Metalloproteinase; ~ Q92031    |
|     |     |    | 1313.8 | 1 | YVEXVXVADHR                           | 99.0         | 15      |                                |
|     |     |    | 2297.3 | 1 | BSHDNABXXTAXVFDEGXXGR                 | 99.0         | 34      |                                |
|     |     |    | 2169.2 | 1 | SHDNABXXTAXVFDEGXXGR                  | 99.0         | 34      |                                |
|     |     |    | 1083.6 | 1 | NPBCXXNBP                             | 98.5         | 9       |                                |
| 27d | 3.1 | 12 | 2297.3 | 1 | BSHDNABXXTAXVFDEGXXGR                 | 99.0         | 23      | Metalloproteinase: ~ B7U492    |
|     |     |    | 2169.2 | 1 | SHDNABXXTAXVFDEGXXGR                  | 99.0         | 30      |                                |
| 28a | 1.8 | 40 | 3432.6 | 1 | NEPSGTDXVSPVCGNDXXEVGEECDGCPR         | 99.0         | 9       | Metalloproteinase; ~ P0C6E3    |
|     |     |    | 1801.0 | 1 | TSHDNABXXTAXVFNR                      | 99.0         | 16      |                                |
|     |     |    | 1463.8 | 1 | VAXVGXEFWCNK                          | 99.0         | 14      |                                |
|     |     |    | 1651.9 | 1 | XYEXVNXXNEXYR                         | 99.0         | 14      |                                |
|     |     |    | 1380.8 | 1 | YXEXFXVVDNR                           | 99.0         | 14      |                                |
|     |     |    | 2123.8 | 1 | YSWVBCESGECDBCR                       | 95.0         | 6       |                                |
| 28b | 4.4 | 24 | 3786.9 | 1 | VAXXMAHEXGHNXGMGHDDNSCTCGGYSCXMP<br>R | 99.0<br>99.0 | 8<br>12 | Metalloproteinase: ~ B7U492    |
|     |     |    | 1201.6 | 1 | APXAGMCDPNR                           |              |         |                                |
|     |     |    | 1327.8 | 1 | YVEXVXXADHR                           | 99.0         | 14      |                                |

28c 1.5 12 1327.8 1 YVEXVXXADHR

99.0 12 Metalloproteinase; ~ B7U492

---

Figure 2C

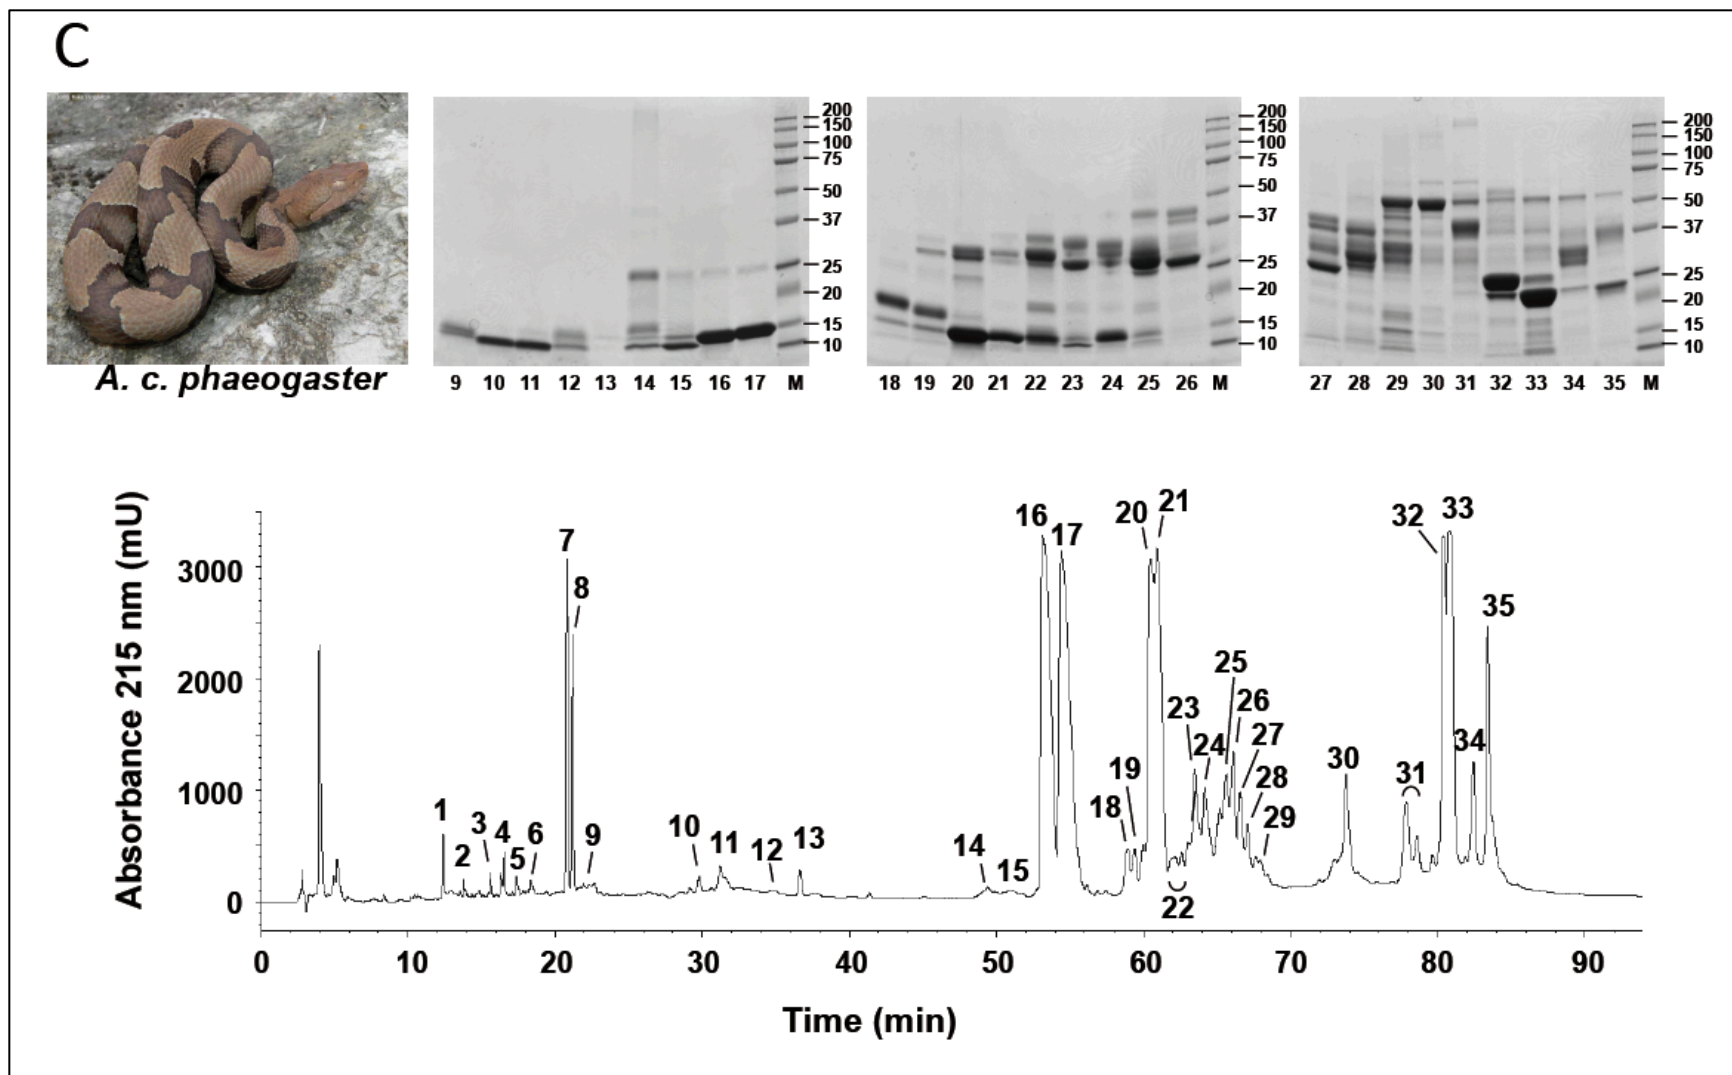

**Table S3:** Assignment of the RP-HPLC isolated fractions of *Agkistrodon contortrix phaeogaster* venom to protein families by MALDI-TOF-TOF or nESI-MS-MS of selected peptide ions from in-gel trypsin-digested protein bands from the SDS-PAGE shown in Fig.2C. \* Cysteine residues are carbamidomethylated. X: Leu/Ile; B: Lys/Gln; Z, pyroglutamate (2-oxo-pyrrolidone carboxylic acid). <sup>da</sup>: deamidated; <sup>ca</sup>: carbamidomethyl; <sup>kyn</sup>: kynurenine. Mass estimations by SDS-PAGE (reducing conditions) are indicated in kDa. Confidence (Conf) and Score (Sc) values are calculated by the Paragon algorithm of ProteinPilot®.

| Peak | %   | Mass, kDa | Peptide ion |   | MS/MS-derived sequence             | Conf (%) | Sc | Protein family; ~ related protein *                |
|------|-----|-----------|-------------|---|------------------------------------|----------|----|----------------------------------------------------|
|      |     |           | m/z         | z |                                    |          |    |                                                    |
| 1    | 0.4 | -         | 470.3       | 1 | ZSPR                               | -        | -  | peptidic fragment                                  |
|      |     |           | 642.1       | 2 | [NeuAc-Hex-HexNAc]-(626.4)         | -        | -  | glycan                                             |
| 2    | 0.1 | -         | 440.3       | 1 | PARP                               | -        | -  | peptidic fragment                                  |
| 3    | 0.2 | -         | 473.5       | 3 | DGGRS(473.5)                       | -        | -  | Bradykinin-potentiating peptide fragment; ~ P01021 |
|      |     |           | 539.3       | 1 | TPPAGP                             | -        | -  | Bradykinin-inhibitory peptide fragment; ~ P85025   |
| 4    | 0.4 | -         | 449.2       | 1 | ZBW <sup>kyn</sup>                 | -        | -  | SVMP inhibitor; P01021                             |
| 5    | 0.2 | -         | 668.6       | 1 | VTPVPR                             | -        | -  | Metalloproteinase fragment; ~ Q92031               |
| 6    | 0.3 | -         | 532.4       | 2 | TPPAGPDVGPR                        | -        | -  | Bradykinin-inhibitory peptide; ~ P85025            |
|      |     |           | 865.6       | 1 | PAGPDVGPR                          | -        | -  | Bradykinin-inhibitory peptide fragments; ~ P85025  |
|      |     |           | 636.5       | 1 | TPPAGPP                            | -        | -  |                                                    |
| 7    | 2.1 | -         | 430.3       | 1 | ZNW                                | -        | -  | SVMP inhibitor; P01021                             |
| 8    | 1.7 | -         | 444.2       | 1 | ZBW                                | -        | -  | SVMP inhibitor; P01021                             |
| 9    | 0.6 | 12        | 2124.0      | 1 | YSWVBCESGECCDBCR                   | 95.2     | 6  | Disintegrin; ~ P0C6E3                              |
| 10   | 0.4 | 11        | 1550.7      | 1 | DAPANCCDAATCK                      | 99.0     | 13 | Disintegrin; ~ Q805F4                              |
|      |     |           | 1967.9      | 1 | XTPGABCAEGXCCDBCK                  | 99.0     | 14 |                                                    |
|      |     |           | 1196.5      | 1 | NPCCDAATCK                         | 99.0     | 14 |                                                    |
|      |     |           | 2098.1      | 1 | ARGDDVN <sup>da</sup> DYCNGXSAGCPR | 99.0     | 10 |                                                    |
| 11   | 1.0 | 10        | 1063.5      | 1 | ARGDNPDYR                          | 99.0     | 9  | Disintegrin; ~ P0C6E3                              |
|      |     |           | 1983.9      | 1 | XTPGSBCAEGXCCDBCK                  | 99.0     | 9  |                                                    |
| 12a  | 0.2 | 11        | 2123.9      | 1 | YSWVBCESGECCDBCR                   | 96.7     | 6  | Disintegrin; ~ P0C6E3                              |
| 12b  | 0.1 | 10        | -           | - | unknown                            | -        | -  | -                                                  |
| 13   | 0.4 | -         | -           | - | unknown                            | -        | -  | -                                                  |
| 14a  | 0.2 | 22        | 1111.5      | 1 | NPNPVPTGCR                         | 99.0     | 10 | Nerve growth factor; ~ Q9DEZ9                      |
|      |     |           | 1758.8      | 1 | HWNSYCTTTNTFVK                     | 99.0     | 15 |                                                    |
| 14b  | 0.1 | 13        | 1111.5      | 1 | NPNPVPTGCR                         | 99.0     | 9  | Nerve growth factor; ~ Q9DEZ9                      |



|     |      |    |        |   |                                    |      |    |                                              |
|-----|------|----|--------|---|------------------------------------|------|----|----------------------------------------------|
|     |      |    | 1758.7 | 1 | HWNSYCTTTNTFVK                     | 99.0 | 19 |                                              |
|     |      |    | 1363.6 | 1 | AXTMEGNBASWR                       | 99.0 | 8  |                                              |
| 14c | 0.2  | 10 | -      | 1 | unknown                            | -    | -  | -                                            |
| 15a | 0.2  | 12 | 1992.2 | 1 | GNVVTVMVVDVNXNNNVYK                | 99.0 | 10 | Nerve growth factor; ~ B8QCI0                |
|     |      |    | 2272.4 | 1 | ETXVSXXEEHPD <sup>ca</sup> EVSHXFR | 99.0 | 10 | svVEGF: ~ Q90X24                             |
|     |      |    | 2060.0 | 1 | NAXTSYGSYGCNCGWGHR                 | 99.0 | 10 | Phospholipase A <sub>2</sub> , K49; ~ P49121 |
| 15b | 0.4  | 10 | 1460.7 | 1 | TEHTDCECRPR                        | 72.9 | -  | svVEGF                                       |
| 16  | 12.8 | 13 | 1474.7 | 1 | AXXCEEENPCXK                       | 99.0 | 16 | Phospholipase A <sub>2</sub> , K49; ~ P49121 |
| 17  | 13.5 | 13 | 1754.9 | 1 | EMCECDBAVAXCXK                     | 99.0 | 14 | Phospholipase A <sub>2</sub> , K49; ~ P49121 |
|     |      |    | 1104.6 | 1 | DRYSYSWK                           | 99.0 | 9  |                                              |
| 18  | 1.0  | 16 | 1505.6 | 1 | CCFVHDCCYGK                        | 99.0 | 18 | Phospholipase A <sub>2</sub> , D49; ~ P51972 |
|     |      |    | 1070.5 | 1 | DNXDTYN <sup>da</sup> SK           | 97.0 | 9  |                                              |
| 19a | 0.3  | 28 | 1526.8 | 1 | XXGGDECNXNEHR                      | 98.3 | 7  | Serine proteinase; ~ Q9DF68                  |
|     |      |    | 1129.7 | 1 | FXVAXYTFR                          | 76.3 | 6  |                                              |
| 19b | 0.6  | 16 | 1505.6 | 1 | CCFVHDCCYGK                        | 99.0 | 17 | Phospholipase A <sub>2</sub> , D49; ~ P51972 |
|     |      |    | 1070.5 | 1 | DNXDTYN <sup>da</sup> SK           | 96.9 | 10 |                                              |
| 20a | 2.0  | 28 | 1498.9 | 1 | VVGGDECNXNEHR                      | 95.2 | 6  | Serine proteinase; ~ Q9YGJ8                  |
| 20b | 2.5  | 26 | 1129.7 | 1 | FXVAXYTFR                          | 99.0 | 10 | Serine proteinase; ~ Q9DF68                  |
|     |      |    | 1526.8 | 1 | XXGGDECNXNEHR                      | 76.6 | 7  |                                              |
| 20c | 3.6  | 13 | 1505.6 | 1 | CCFVHDCCYGK                        | 99.0 | 16 | Phospholipase A <sub>2</sub> , D49; ~ P51972 |
| 21  | 6.9  | 13 | 980.5  | 1 | BXCECDR                            | 88.5 | -  | Phospholipase A <sub>2</sub> , D49; ~ Q90W39 |
| 22a | 0.4  | 31 | 1526.9 | 1 | XXGGDECNXNEHR                      | 99.0 | 9  | Serine proteinase; ~ P81176                  |
| 22b | 0.6  | 26 | 1189.7 | 1 | WDBDXMXXR                          | 99.0 | 7  | Serine proteinase; ~ P09872                  |
|     |      |    | 1531.9 | 1 | GXAATTXCAGXXEGGK                   | 99.0 | 18 |                                              |
| 22c | 0.2  | 17 | 1531.9 | 1 | GXAATTXCAGXXEGGK                   | 99.0 | 12 | Serine proteinase; ~ P09872                  |
|     |      |    | 1498.8 | 1 | VVGGDECNXNEHR                      | 99.0 | 8  |                                              |
| 22d | 0.6  | 13 | 980.5  | 1 | BXCECDR                            | 88.5 | -  | Phospholipase A <sub>2</sub> , D49; ~ Q90W39 |
| 23a | 0.8  | 29 | 1531.9 | 1 | GXAATTXCAGXXEGGK                   | 99.0 | 10 | Serine proteinase; ~ P09872                  |
|     |      |    | 2260.3 | 1 | NSAHXAPXSXPSNPPSVGSVCR             | 99.0 | 12 |                                              |
|     |      |    | 2578.4 | 1 | ETYDPVPHCANXNXXDYEVCR              | 99.0 | 12 |                                              |
|     |      |    | 2562.4 | 1 | TFXCGGTXXNBEWVXTAAHCDR             | 99.0 | 10 |                                              |
|     |      |    | 2856.6 | 1 | GDSGGPXXCNGBFBGXXSVGGNPCABPR       | 99.0 | 8  |                                              |
| 23b | 1.4  | 25 | 1457.9 | 1 | XXNEDEBTRDPK                       | 99.0 | 9  | Serine proteinase; ~ Q9YGJ8                  |
|     |      |    | 1512.8 | 1 | VXGGDECNXNEHR                      | 99.0 | 10 |                                              |

|        |     |               |        |    |                            |      |    |                                              |
|--------|-----|---------------|--------|----|----------------------------|------|----|----------------------------------------------|
| 23c    | 1.1 | 11            | 1202.7 | 1  | XWBTGXWWX                  | 99.0 | 10 | Ohanin-like; ~ Q27J48                        |
|        |     |               | 2073.1 | 1  | ADVTFDSNTAFSSXVVSANK       | 99.0 | 22 |                                              |
|        |     |               | 1241.6 | 1  | DFSWEWTDR                  | 99.0 | 8  |                                              |
| 1401.8 | 1   | GBAEVWXGXWDK  | 99.0   | 14 |                            |      |    |                                              |
| 1572.8 | 1   | EFCVEXVSXTGYR | 99.0   | 13 |                            |      |    |                                              |
| 24a    | 0.9 | 29            | 1512.7 | 1  | VXGGDECNXNEHR              | 99.0 | 10 | Serine proteinase; ~ Q9PTL3                  |
|        |     |               | 2260.1 | 1  | NSAHXAPXSXPSNPPSVGSVCR     | 99.0 | 10 |                                              |
| 24b    | 1.0 | 26            | 1512.8 | 1  | VXGGDECNXNEHR              | 99.0 | 7  | Serine proteinase; ~ Q9PTL3                  |
|        |     |               | 2260.3 | 1  | NSAHXAPXSXPSNPPSVGSVCR     | 99.0 | 10 |                                              |
| 24c    | 1.2 | 13            | 1112.5 | 1  | DNBDTYDNK                  | 99.0 | 12 | Phospholipase A <sub>2</sub> , D49; ~ Q7SID6 |
|        |     |               | 2217.1 | 1  | SGXWYYSYGCYCGAGGBGR        | 99.0 | 9  |                                              |
|        |     |               | 1505.6 | 1  | CCFVHDCCYGK                | 99.0 | 17 |                                              |
|        |     |               | 981.4  | 1  | EXCECDR                    | 99.0 | 9  |                                              |
| 25a    | 0.5 | 39            | 1605.8 | 1  | XXCAGVXEGGXDTCK            | 99.0 | 14 | Serine proteinase; ~ Q9PSN3                  |
|        |     |               | 1277.8 | 1  | XAXDXEXATYR                | 99.0 | 11 |                                              |
|        |     |               | 1512.7 | 1  | VXGGDECNXNEHR              | 99.0 | 8  |                                              |
|        |     |               | 1189.7 | 1  | WDBDXMXXR                  | 99.0 | 7  |                                              |
|        |     |               | 1762.0 | 1  | XXCAGVXEGGXDTCBR           | 99.0 | 11 |                                              |
|        |     |               | 2317.3 | 1  | NSEHXAPXSXPSPPXVGSVCR      | 99.0 | 20 |                                              |
|        |     |               | 2218.1 | 1  | DSGGPXXCNGBFBGXVSWGPK      | 99.0 | 23 |                                              |
| 25b    | 1.0 | 28            | 1097.7 | 1  | FXAXVYTDR                  | 99.0 | 9  | Serine proteinase; ~ Q71QI3                  |
|        |     |               | 1498.8 | 1  | VVGGDECNXNEHR              | 92.0 | 6  |                                              |
| 25c    | 1.5 | 25            | 2900.7 | 1  | XDRPVNSAHXAPXSXPSPPSVGSVCR | 99.0 | 12 | Serine proteinase; ~ Q9YGJ9                  |
|        |     |               | 1824.1 | 1  | XAPXSXPSPPSVGSVCR          | 99.0 | 10 |                                              |
|        |     |               | 1512.8 | 1  | VXGGDECNXNEHR              | 99.0 | 8  |                                              |
|        |     |               | 1190.7 | 1  | XMGWGTXSPTK                | 99.0 | 12 |                                              |
|        |     |               | 1097.7 | 1  | FXAXVYTDR                  | 99.0 | 13 |                                              |
| 25d    | 0.9 | 23            | 1498.6 | 1  | VVGGDECNXNEHR              | 99.0 | 9  | Serine proteinase; ~ Q9YGJ8                  |
| 26a    | 0.6 | 40            | 1762.0 | 1  | XXCAGVXEGGXDTCBR           | 99.0 | 12 | Serine proteinase; ~ Q9PSN3                  |
|        |     |               | 2317.4 | 1  | NSEHXAPXSXPSPPXVGSVCR      | 99.0 | 16 |                                              |
|        |     |               | 1512.8 | 1  | VXGGDECNXNEHR              | 99.0 | 8  |                                              |
| 26b    | 0.3 | 37            | -      | 1  | unknown                    | -    | -  | -                                            |
| 26c    | 1.3 | 25            | 1597.0 | 1  | BXXNEDEBXRNPK              | 99.0 | 8  | Serine proteinase; ~ Q8AY79                  |
|        |     |               | 1498.8 | 1  | VVGGDECNXNEHR              | 99.0 | 7  |                                              |
| 27a    | 1.0 | 41            | 1747.1 | 1  | BBDDEBDBDXMXXR             | 99.0 | 10 | Serine proteinase; ~ Q2QA04                  |
|        |     |               | 1512.8 | 1  | VXGGDECNXNEHR              | 99.0 | 10 |                                              |
| 27b    | 0.3 | 37            | 1514.7 | 1  | ETDYEEFXEXAR               | 99.0 | 9  | L-amino acid oxidase; ~ Q90W54               |

|      |     |     |        |   |                                  |      |    |                                |
|------|-----|-----|--------|---|----------------------------------|------|----|--------------------------------|
| 27c  | 0.3 | 31  | 1514.7 | 1 | ETDYEEFXEXAR                     | 99.0 | 9  | L-amino acid oxidase; ~ Q90W54 |
|      |     |     | 1165.7 | 1 | XBFEPPXPPK                       | 99.0 | 9  |                                |
|      |     |     | 1123.5 | 1 | HDDXFGYEK                        | 99.0 | 11 |                                |
|      |     |     | 1711.9 | 1 | DCGDXVXNDXSXXHB                  | 99.0 | 14 |                                |
| 27d  | 0.6 | 26  | 2857.6 | 1 | GDSGGPXXCNGBFBGXXSVGGNPCABPR     | 99.0 | 10 | Serine proteinase; ~ E5L0E6    |
|      |     |     | 2260.4 | 1 | NSAHXAPXSXPSNPPSVGSVCR           | 95.0 | 6  |                                |
| 28a  | 0.3 | 36  | 1498.7 | 1 | VVGGDECNXNEHR                    | 99.0 | 9  | Serine proteinase; ~ Q71QJ1    |
| 28b  | 0.4 | 29  | 1514.8 | 1 | ETDYEEFXEXAR                     | 99.0 | 11 | L-amino acid oxidase; ~ Q90W54 |
|      |     |     | 2523.4 | 1 | FGXEXNEFFBENDNAWYFXK             | 99.0 | 8  |                                |
|      |     |     | 2953.7 | 1 | YAMGGXTTFTPYBFBHFSEAXTAPFK       | 99.0 | 9  |                                |
|      |     |     | 2347.4 | 1 | XYFAGEYTABFHGWXDSTXK             | 99.0 | 21 |                                |
| 28c  | 0.3 | 26  | 1762.1 | 1 | XXCAGVXEGGXDTCBR                 | 99.0 | 8  | Serine proteinase; ~ Q9PSN3    |
|      |     |     | 3363.8 | 1 | SSCDGDSGGPXXCNGEXBGXVSWGGDXCABPR | 99.0 | 12 |                                |
|      |     |     | 2317.4 | 1 | NSEHXAPXSXPSSPPXVGSVCR           | 99.0 | 13 |                                |
|      |     |     | 2218.3 | 1 | DSGGPXXCNGBFBGXXVSWGPK           | 99.0 | 18 |                                |
| 29a  | 0.4 | 48  | 1514.8 | 1 | ETDYEEFXEXAR                     | 99.0 | 8  | L-amino acid oxidase; ~ Q90W54 |
|      |     |     | 2347.4 | 1 | XYFAGEYTABFHGWXDSTXK             | 99.0 | 10 |                                |
| 29b  | 0.2 | 41  | 2856.6 | 1 | GDSGGPXXCNGBFBGXXSVGGNPCABPR     | 99.0 | 13 | Serine proteinase; ~ P09872    |
|      |     |     | 1531.9 | 1 | GXAATTXCAGXXEGGK                 | 99.0 | 7  |                                |
|      |     |     | 3362.9 | 1 | SSCDGDSGGPXXCNGEXBGXVSWGGDXCABPR | 99.0 | 15 |                                |
| 29c  | 0.2 | 31  | 1468.8 | 1 | XXNEDEBXRNPK                     | 99.0 | 8  | Serine proteinase; ~ Q8AY79    |
|      |     |     | 1596.9 | 1 | BXXNEDEBXRNPK                    | 99.0 | 9  |                                |
| 29d  | 0.2 | 28  | 1526.6 | 1 | XXGGDECNXNEHR                    | 91.0 | 7  | Serine proteinase; ~ Q9YGJ9    |
| 29'e | 0.1 | 15  | 1327.8 | 1 | YVEXVXXADHR                      | 99.0 | 9  | Metalloproteinase; ~ B7U492    |
| 29'f | 0.1 | 10  | 1594.7 | 1 | DBEDWYANXGPMR                    | 99.0 | 11 | L-amino acid oxidase; ~ Q90W54 |
|      |     |     | 1514.7 | 1 | ETDYEEFXEXAR                     | 99.0 | 15 |                                |
|      |     |     | 1220.6 | 1 | RNPXEFCFR                        | 97.5 | 8  |                                |
| 30   | 4.0 | 47  | 3362.9 | 1 | SSCDGDSGGPXXCNGEXBGXVSWGGDXCABPR | 99.0 | 13 | Serine proteinase; ~ B0VXT7    |
| 31a  | 0.3 | 210 | -      | 1 | unknown                          | -    | -  | -                              |
| 31b  | 1.4 | 48  | 1123.5 | 1 | HDDXFGYEK                        | 99.0 | 12 | L-amino acid oxidase; ~ Q90W54 |
|      |     |     | 1064.5 | 1 | NPXEFCFR                         | 99.0 | 11 |                                |
|      |     |     | 1514.7 | 1 | ETDYEEFXEXAR                     | 99.0 | 11 |                                |
| 31c  | 2.1 | 37  | 1733.9 | 1 | MYDXVNVXTPXYHR                   | 99.0 | 10 | Metalloproteinase; ~ Q9DGB9    |
|      |     |     | 2929.2 | 1 | TDVVSPA VCGNYFVEVGEECDGSPR       | 99.0 | 12 |                                |
|      |     |     | 1368.6 | 1 | XYCFPNPENK                       | 98.9 | 6  |                                |
| 32a  | 0.8 | 49  | 1514.7 | 1 | ETDYEEFXEXAR                     | 99.0 | 11 | L-amino acid oxidase; ~ Q90W54 |

|     |     |    |        |   |                                 |      |    |                                |
|-----|-----|----|--------|---|---------------------------------|------|----|--------------------------------|
| 32b | 3.2 | 23 | 1313.9 | 1 | YVEXVXVADHR                     | 99.0 | 14 | Metalloproteinase; ~ Q92031    |
| 32c | 2.6 | 20 | 1067.5 | 1 | YNGDSDBXR                       | 96.1 | 6  | Metalloproteinase; ~ P28891    |
| 33a | 1.7 | 50 | 1514.7 | 1 | ETDYEEFXEXAR                    | 99.0 | 10 | L-amino acid oxidase; ~ Q90W54 |
| 33b | 2.0 | 23 | 1310.7 | 1 | SHDNABXXTAXK                    | 99.0 | 15 | Metalloproteinase; ~ P84035    |
| 33c | 4.3 | 20 | 1312.9 | 1 | YVBXVXVADHR                     | 99.0 | 14 | Metalloproteinase; ~ P28891    |
|     |     |    | 2564.6 | 1 | XSHDNABXXTAXEXDGETXGXANR        | 99.0 | 12 |                                |
|     |     |    | 3407.0 | 1 | BRHDNABXXTAXDFDGDVVGXAYVGGMCBXX | 99.0 | 11 |                                |
|     |     |    | 3122.8 | 1 | HDNABXXTAXDFDGDVVGXAYVGGMCBXX   | 99.0 | 25 |                                |
|     |     |    | 2169.3 | 1 | SHDNABXXTAXVFDEGXXGR            | 99.0 | 26 |                                |
| 34a | 0.5 | 51 | 2169.1 | 1 | SHDNABXXTAXVFDEGXXGR            | 99.0 | 27 | Metalloproteinase; ~ B7U492    |
|     |     |    | 1312.7 | 1 | YVBXVXVADHR                     | 99.0 | 11 |                                |
| 34b | 0.8 | 30 | 1380.9 | 1 | YXEXFXVVDNR                     | 99.0 | 9  | Metalloproteinase; ~ P0C6E3    |
|     |     |    | 1313.8 | 1 | YVEXVXVADHR                     | 99.0 | 12 |                                |
| 34c | 0.8 | 28 | 1380.9 | 1 | YXEXFXVVDNR                     | 99.0 | 11 | Metalloproteinase; ~ P0C6E3    |
|     |     |    | 1652.0 | 1 | XYEXVNXXNEXYR                   | 99.0 | 13 |                                |
|     |     |    | 1313.8 | 1 | YVEXVXVADHR                     | 99.0 | 15 |                                |
| 34d | 0.3 | 21 | 1313.8 | 1 | YVEXVXVADHR                     | 99.0 | 15 | Metalloproteinase; ~ P0C6E3    |
|     |     |    | 1801.1 | 1 | TSHDNABXXTAXVFNR                | 99.0 | 7  |                                |
| 35a | 1.7 | 36 | 3432.8 | 1 | NEPSGTDXVSPVCGNDXXEVGEECDGCGPR  | 99.0 | 16 | Metalloproteinase; ~ P0C6E3    |
|     |     |    | 2564.6 | 1 | XSHDNABXXTAXEXDGETXGXANR        | 99.0 | 17 |                                |
|     |     |    | 1327.8 | 1 | YVEXVXXADHR                     | 99.0 | 9  |                                |
|     |     |    | 1652.0 | 1 | XYEXVNXXNEXYR                   | 99.0 | 14 |                                |
|     |     |    | 1312.8 | 1 | YVBXVXVADHR                     | 99.0 | 13 |                                |
| 35b | 3.0 | 22 | 1327.8 | 1 | YVEXVXXADHR                     | 99.0 | 8  | Metalloproteinase; ~ P0C6E3    |
|     |     |    | 3432.8 | 1 | NEPSGTDXVSPVCGNDXXEVGEECDGCGPR  | 99.0 | 18 |                                |
|     |     |    | 2124.0 | 1 | YSWVBCESGECCBCR                 | 99.0 | 11 |                                |
|     |     |    | 1652.0 | 1 | XYEXVNXXNEXYR                   | 99.0 | 15 |                                |

---

Figure 2E

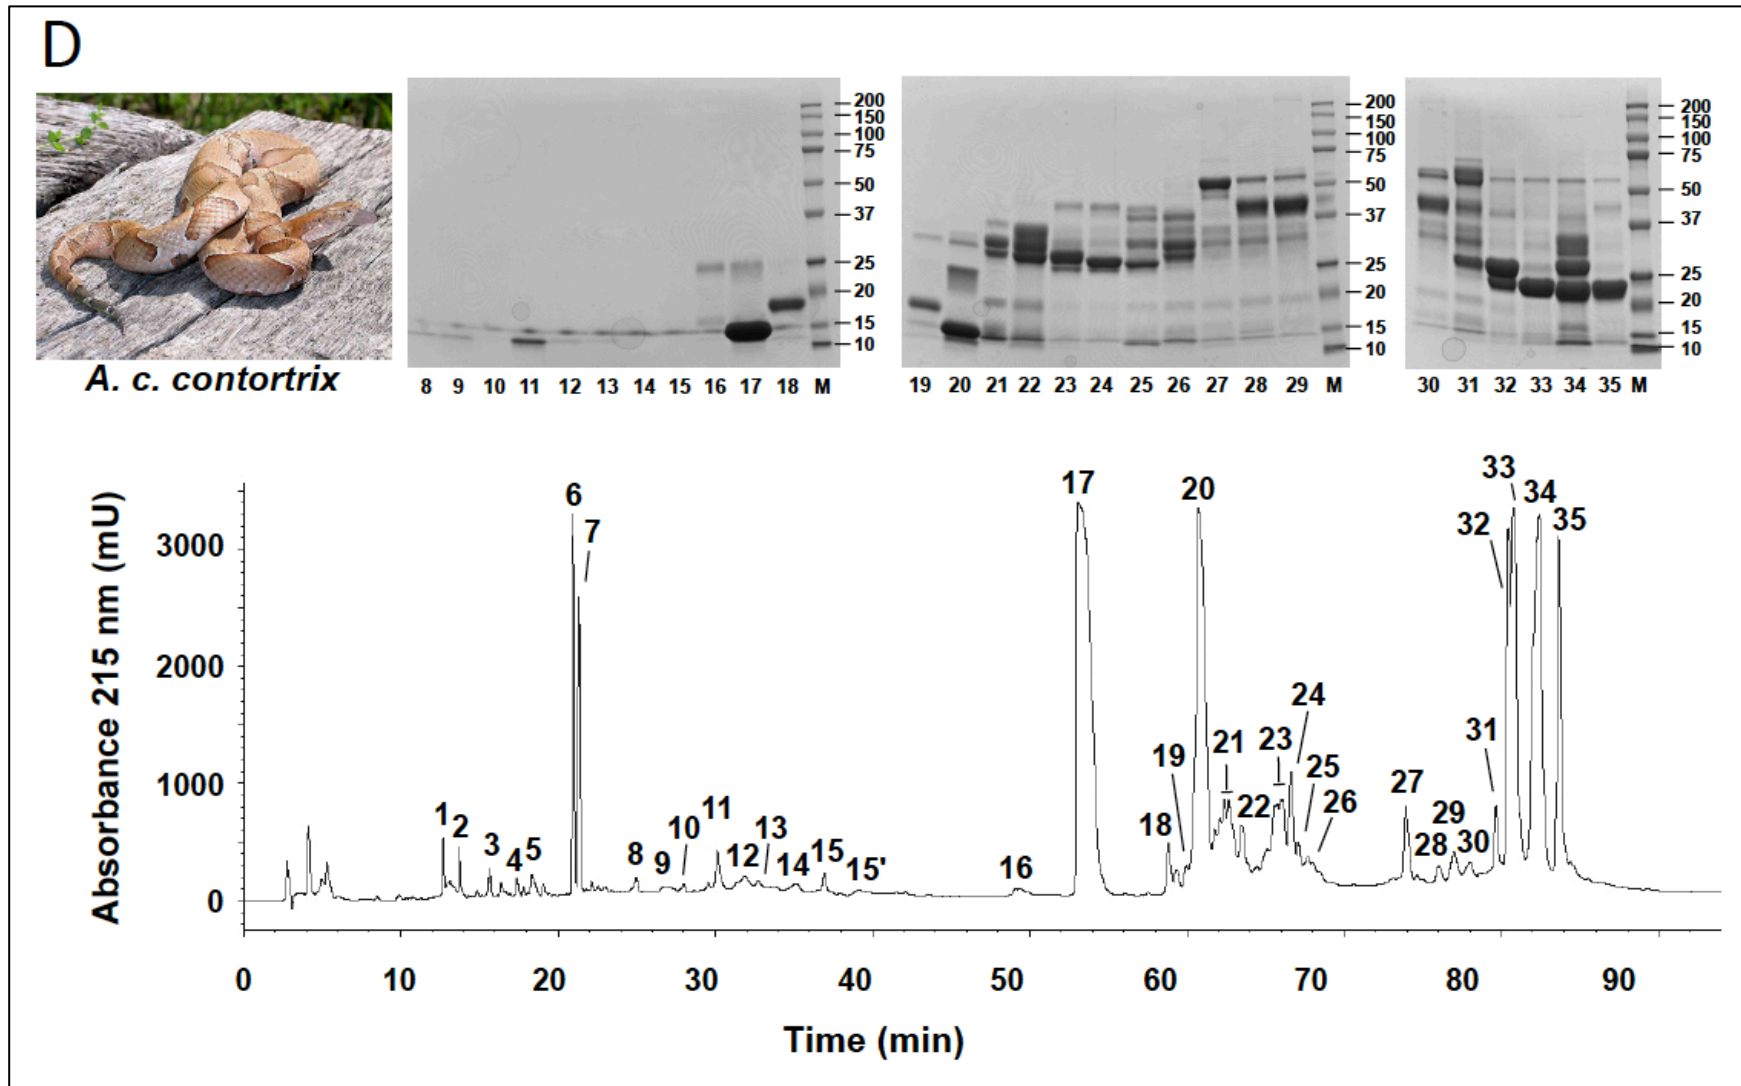

**Table S4:** Assignment of the RP-HPLC isolated fractions of *Agkistrodon contortrix contortrix* venom to protein families by MALDI-TOF-TOF or nESI-MS-MS of selected peptide ions from in-gel trypsin-digested protein bands from the SDS-PAGE shown in Fig.2D. \* Cysteine residues are carbamidomethylated. X: Leu/Ile; B: Lys/Gln; Z, pyroglutamate (2-oxo-pyrrolidone carboxylic acid). <sup>ox</sup>: oxidized; <sup>da</sup>: deamidated; <sup>ca</sup>: carbamidomethyl; Mass estimations by SDS-PAGE (reducing conditions) are indicated in kDa, or in parentheses when determined by ESI-MS. Confidence (Conf) and Score (Sc) values are calculated by the Paragon algorithm of ProteinPilot<sup>®</sup>.

| Peak | %    | Mass, kDa<br>(ESI-MS) | Peptide ion |   | MS/MS-derived or N-terminal (Nt) sequence | Conf<br>(%) | Sc | Protein family; ~ related protein *          |
|------|------|-----------------------|-------------|---|-------------------------------------------|-------------|----|----------------------------------------------|
|      |      |                       | m/z         | z |                                           |             |    |                                              |
| 1    | 0.3  |                       | 385.3       | 1 | TPPA                                      |             |    | Bradykinin-inhibitory peptide; P85025        |
| 2    | 0.2  |                       | 539.2       | 1 | TPPAGP                                    |             |    | Bradykinin-inhibitory peptide; P85025        |
| 3    | 0.2  |                       | 865.4       | 1 | PAGPDVGPR                                 |             |    | Bradykinin-inhibitory peptide; P85025        |
|      |      |                       | 481.7       | 2 | PPAGPDVGPR                                |             |    | Bradykinin-inhibitory peptide; P85025        |
|      |      |                       | 532.3       | 2 | TPPAGPDVGPR                               |             |    | Bradykinin-inhibitory peptide; P85025        |
| 4    | 0.2  |                       | 592.2       | 2 | TPNXTPEBBR                                |             |    | N-t fragment of PII-SVMP; ACJ61245           |
| 5    | 0.3  |                       | 398.8       | 2 | BVTPVPR                                   |             |    | Fragment of PI-SVMP; ACV83930                |
| 6    | 3.0  |                       | 452.1       | 1 | ZNW+Na                                    |             |    | SVMP inhibitor; P01021                       |
|      |      |                       | 430.2       | 1 | ZNW                                       |             |    | SVMP inhibitor; P01021                       |
| 7    | 2.2  |                       | 444.1       | 1 | ZBW                                       |             |    | SVMP inhibitor; P01021                       |
| 8    | 0.4  | 12                    | -           | - | Nt: DAPANPCCDAATCKL                       |             |    | Disintegrin, acostatin β; Q805F6             |
| 9    | 0.4  | 12                    | 1967.8      | 1 | XTPGABCAEGXCCDBCK                         | 99.0        | 7  | Disintegrin; ~ C9E1S2                        |
| 10   | 0.2  | (13508)               | -           | - | Nt: IAPANPCCDAATCKL                       | -           | -  | Disintegrin, acostatin αβ; PDB 3C05          |
| 11   | 0.9  | 11                    | 1870.8      | 1 | GDDVNDYCNXGXSAGCPR                        | 99.0        | 13 | Disintegrin; ~ P16338                        |
|      |      |                       | 1967.8      | 1 | XTPGABCAEGXCCDBCK                         | 99.0        | 12 |                                              |
| 12   | 1.0  | 13                    | 2059.9      | 1 | NAXTSYGSYGNCNGWGHR                        | 99.0        | 7  | Phospholipase A <sub>2</sub> , K49; ~ P49121 |
| 13   | 0.4  | 13                    | 2059.9      | 1 | NAXTSYGSYGNCNGWGHR                        | 99.0        | 6  | Phospholipase A <sub>2</sub> , K49; ~ P49121 |
| 14   | 0.4  |                       | 2015.8      | 1 | Nt: GQGCFLKLDRIKMSGMGC                    | -           | -  | C-natriuretic peptide; ~ P0CV87              |
| 15   | 0.2  | 13                    | 2059.9      | 1 | NAXTSYGSYGNCNGWGHR                        | 99.0        | 7  | Phospholipase A <sub>2</sub> , K49; ~ P49121 |
|      |      |                       |             |   | Nt: DIVSPPVCGNDILEV                       |             |    |                                              |
| 15'  | <0.1 |                       |             |   | Nt: DIVSPPVCGNEVLEVG                      | -           | -  | DC fragment of metalloproteinase; ~ AEJ31992 |
| 16a  | 0.3  | 24                    | 1420.7      | 1 | A <sup>ca</sup> XTMEGNBASWR               | 99.0        | 9  | Nerve growth factor; ~ Q9DEZ9                |
|      |      |                       | 1815.9      | 1 | H <sup>ca</sup> WNSYCTTTNTFVK             | 99.0        | 11 |                                              |
|      |      |                       | 1111.6      | 1 | NPNPVPTGCR                                | 99.0        | 7  |                                              |

|     |      |         |        |   |                                                     |      |    |                                              |
|-----|------|---------|--------|---|-----------------------------------------------------|------|----|----------------------------------------------|
| 16b | 0.1  | 13      | -      | - | Nt: SPPGIWKRADVTFASNTA                              | -    | -  | Ohanin-like/vespryn; AEJ32004                |
| 17a | 2.0  | (13993) | 2059.9 | 1 | Nt: SLLELGKMILQETGKNAITSYGSYG<br>NAXTSYGSYGCNCGWGHR | 95.1 | 7  | Phospholipase A <sub>2</sub> , K49; ~ P49121 |
| 17b | 18.1 | 13      | 2059.9 | 1 | Nt: SLLELGKMILQETGKNAITSYGSYG<br>NAXTSYGSYGCNCGWGHR | 99.0 | 13 | Phospholipase A <sub>2</sub> , K49; ~ P49121 |
| 18  | 0.8  | 17      | 1505.6 | 1 | CCFVHDCCYGK                                         | 99.0 | 12 | Phospholipase A <sub>2</sub> , D49; ~ Q91506 |
|     |      |         | 1292.5 | 1 | Y <sup>ca</sup> GCYCGWGGR                           | 98.4 | 10 |                                              |
| 19a | 0.1  | 31      | 1186.8 | 1 | FXVAXYTFR                                           | 97.7 | 8  | Serine proteinase; ~ P0CV90                  |
| 19b | 0.3  | 18      | 1562.6 | 1 | CCFVH <sup>ca</sup> DCCYGK                          | 99.0 | 11 | Phospholipase A <sub>2</sub> , D49; ~ Q91506 |
| 20a | 1.2  | 30      | 1597.8 | 1 | CANXNXXDYSVCR                                       | 99.0 | 9  | Serine proteinase; ~ Q9DF68                  |
|     |      |         | 1186.7 | 1 | F <sup>ca</sup> XVAXYTFR                            | 82.8 | 7  |                                              |
| 20b | 3.7  | 24      | 1537.7 | 1 | MEWYPEAAANAER                                       | 99.0 | 9  | CRISP; ~ Q7ZTA0                              |
|     |      |         | 1195.6 | 1 | SVDFDSESPR                                          | 95.7 | 9  |                                              |
| 20c | 8.7  | (14038) | -      | - | Nt: NVYDFEKLIQKIVGR                                 | -    | -  | Phospholipase A <sub>2</sub> , D49; ~ P59265 |
|     |      |         | 1562.6 | 1 | CCFVH <sup>ca</sup> DCCYGK                          | 99.0 | 11 |                                              |
|     |      |         | 865.5  | 1 | BAAXCFR                                             | 66.5 | 8  |                                              |
| 21a | 0.3  | 35      | -      | - | Nt: VVGGDECNINEHRFL                                 | -    | -  | Serine proteinase; ~ P82981                  |
| 21b | 1.4  | 29      | 1498.7 | 1 | VVGGDECNXNEHR                                       | 93.0 | 7  | Serine proteinase; ~ Q71QJ1                  |
|     |      |         | 1189.7 | 1 | WDBDXMXXR                                           | 59.7 | 8  |                                              |
| 21c | 1.0  | 27      | 1307.7 | 1 | NFBMXFGVHSK                                         | 99.0 | 12 | Serine proteinase; ~ Q9YGJ8                  |
|     |      |         | 2494.2 | 1 | ETYPDVPHCANXNXXDHAVCR                               | 99.0 | 14 |                                              |
|     |      |         | 2888.6 | 1 | XDSPVSDSEHXAPXSXPSSPPSVGSVCR                        | 99.0 | 14 |                                              |
| 21d | 0.4  | 18      | 1641.8 | 1 | XNXXDYAVCBAAYK                                      | 99.0 | 10 | Serine proteinase; ~ P09872                  |
|     |      |         | 1531.8 | 1 | GXAATTXCAGXXEGGK                                    | 99.0 | 6  |                                              |
| 21e | 1.6  | 12      | 1206.6 | 1 | XWNDBVCGSK                                          | 99.0 | 9  | C-type lectin/lectin-like: ~ Q9PSN0          |
|     |      |         | 1401.7 | 1 | GBAEVWXGXWDK                                        | 99.0 | 10 |                                              |
|     |      |         | 1572.8 | 1 | EFCVEXVSXTGYR                                       | 99.0 | 14 |                                              |
|     |      |         | 1241.5 | 1 | DFSWEWTDNR                                          | 99.0 | 14 |                                              |
| 22a | 0.5  | 32      | 2562.3 | 1 | TFXCGGTXXNBEWVXTAAHCDR                              | 99.0 | 7  | Serine proteinase; ~ P09872                  |
|     |      |         | 2857.4 | 1 | GDSGGPXXCNGBFBGXXSVGGNPCABPR                        | 99.0 | 15 |                                              |
|     |      |         | 2260.2 | 1 | NSAHXAPXSXPSNPPSVGSVCR                              | 99.0 | 11 |                                              |
| 22b | 0.5  | 29      | 2856.4 | 1 | GDSGGPXXCNGBFBGXXSVGGNPCABPR                        | 99.0 | 14 | Serine proteinase; ~ P09872                  |
|     |      |         | 1097.6 | 1 | FXAXVYTDR                                           | 99.0 | 10 |                                              |
|     |      |         | 2260.2 | 1 | NSAHXAPXSXPSNPPSVGSVCR                              | 99.0 | 14 |                                              |
| 22c | 0.4  | 26      | 2494.2 | 1 | ETYPDVPHCANXNXXDHAVCR                               | 99.0 | 11 | Serine proteinase; ~ Q072L6                  |
|     |      |         | 2888.5 | 1 | XDSP <sup>ox</sup> VSDSEHXAPXSXPSSPPSVGSVCR         | 99.0 | 18 |                                              |

|     |     |    |        |   |                                      |      |    |                                     |
|-----|-----|----|--------|---|--------------------------------------|------|----|-------------------------------------|
|     |     |    | 1097.7 | 1 | FXAXVYTDR                            | 97.6 | 7  |                                     |
| 22d | 0.1 | 18 | 1824.0 | 1 | XAPXSPSSPPSVGSVCR                    | 99.0 | 10 | Serine proteinase; ~ Q9YGI6         |
|     |     |    | 1097.6 | 1 | FXAXVYTDR                            | 98.7 | 10 |                                     |
| 22e | 0.1 | 12 | 1369.7 | 1 | BDFSWEWTDR                           | 99.0 | 9  | C-type lectin/lectin-like: ~ Q9PSN0 |
|     |     |    | 1401.8 | 1 | GBAEVWXGXWDK                         | 99.0 | 13 |                                     |
|     |     |    | 1572.8 | 1 | EFCVEXVSXTGYR                        | 99.0 | 15 |                                     |
|     |     |    | 1241.6 | 1 | DFSWEWTDR                            | 99.0 | 13 |                                     |
| 23a | 0.7 | 40 | -      | - | unknown                              | -    | -  |                                     |
| 23b | 3.3 | 26 | 2119.2 | 1 | SAHXAPXSPSSPPSVGSVCR                 | 99.0 | 12 | Serine proteinase; ~ Q9YGI6         |
|     |     |    | 1824.0 | 1 | XAPXSPSSPPSVGSVCR                    | 99.0 | 13 |                                     |
|     |     |    | 1097.6 | 1 | FXAXVYTDR                            | 98.9 | 11 |                                     |
| 23c | 1.0 | 24 | 2206.1 | 1 | XXDDAACBPGYPEVXPEYR                  | 99.0 | 9  | Serine proteinase; ~ P82981         |
|     |     |    | 2433.3 | 1 | XNXXDDAACBPGYPEVXPEYR                | 99.0 | 10 |                                     |
|     |     |    | 1097.6 | 1 | FXAXVYTDR                            | 97.9 | 7  |                                     |
| 23d | 0.3 | 12 | 1401.8 | 1 | GBAEVWXGXWDK                         | 99.0 | 13 | C-type lectin/lectin-like: ~ Q9PSN0 |
|     |     |    | 1572.8 | 1 | EFCVEXVSXTGYR                        | 99.0 | 12 |                                     |
|     |     |    | 1241.6 | 1 | DFSWEWTDR                            | 99.0 | 11 |                                     |
|     |     |    | 1288.6 | 1 | SCTDYXTWDK                           | 96.7 | 7  |                                     |
| 24a | 0.4 | 40 | 1605.8 | 1 | XXCAGVXEGGXDTCK                      | 99.0 | 11 | Serine proteinase; ~ Q9PSN3         |
|     |     |    | 2218.1 | 1 | DSGGPXXCN <sup>da</sup> GBFBGXVSWGPK | 99.0 | 13 |                                     |
|     |     |    | 2317.3 | 1 | NSEHXAPXSPSSPPXVGSVCR                | 99.0 | 16 |                                     |
| 24b | 1.3 | 25 | 1097.6 | 1 | FXAXVYTDR                            | 97.9 | 8  | Serine proteinase; ~ Q8AY79         |
|     |     |    | 2451.3 | 1 | AVGXXGEFVDGHPYSDXDXDYR               | 97.2 | 10 |                                     |
|     |     |    | 1257.7 | 1 | BXXNEDEBXR                           | 95.4 | 7  |                                     |
|     |     |    | 1498.7 | 1 | VVGDECNXNEHR                         | 94.2 | 6  |                                     |
| 24c | 0.1 | 12 | 1572.8 | 1 | EFCVEXVSXTGYR                        | 99.0 | 11 | C-type lectin/lectin-like: ~ Q9PSN0 |
|     |     |    | 1241.6 | 1 | DFSWEWTDR                            | 99.0 | 10 |                                     |
|     |     |    | 1401.8 | 1 | GBAEVWXGXWDK                         | 98.8 | 9  |                                     |
| 25a | 0.1 | 39 | 1605.8 | 1 | XXCAGVXEGGXDTCK                      | 99.0 | 13 | Serine proteinase; ~ Q9PSN3         |
|     |     |    | 1512.7 | 1 | VXGGDECNXNEHR                        | 99.0 | 8  |                                     |
|     |     |    | 2218.1 | 1 | DSGGPXXCN <sup>da</sup> GBFBGXVSWGPK | 99.0 | 14 |                                     |
|     |     |    | 2317.3 | 1 | NSEHXAPXSPSSPPXVGSVCR                | 99.0 | 16 |                                     |
| 25b | 0.1 | 36 | 2218.1 | 1 | DSGGPXXCN <sup>da</sup> GBFBGXVSWGPK | 99.0 | 6  | Serine proteinase; ~ Q9PSN3         |
|     |     |    | 2317.3 | 1 | NSEHXAPXSPSSPPXVGSVCR                | 99.0 | 14 |                                     |
| 25c | 0.1 | 29 | 1294.7 | 1 | XNXXDYEVCR                           | 98.2 | 7  | Serine proteinase; ~ Q8UUJ1         |
| 25d | 0.2 | 25 | 1498.7 | 1 | VVGDECNXNEHR                         | 81.8 | 6  | Serine proteinase; ~ Q8AY79         |
| 25e | 0.1 | 11 | 1401.8 | 1 | GBAEVWXGXWDK                         | 99.0 | 12 | C-type lectin/lectin-like: ~ Q9PSN0 |



|     |     |     |        |   |                                            |      |    |                                     |
|-----|-----|-----|--------|---|--------------------------------------------|------|----|-------------------------------------|
|     |     |     | 1572.8 | 1 | EFCVEXVSXTGYR                              | 99.0 | 15 |                                     |
|     |     |     | 1241.6 | 1 | DFSWEWTDR                                  | 99.0 | 11 |                                     |
| 26a | 0.4 | 37  | 2218.1 | 1 | DSGGPXXCN <sup>da</sup> GBFBGXVSWGPK       | 99.0 | 11 | Serine proteinase; ~ Q9PSN3         |
|     |     |     | 2317.2 | 1 | NSEHXAPXSXPSSPPXVGSVCR                     | 99.0 | 12 |                                     |
| 26b | 0.2 | 33  | 2608.2 | 1 | XVNNVSDXVBXXEDTBVEPEVR                     | 99.0 | 8  | Serine proteinase; ~ P09872         |
|     |     |     | 2857.4 | 1 | GDSGGPXXCN <sup>da</sup> GBFBGXSVGGNPCABPR | 99.0 | 12 |                                     |
|     |     |     | 2260.2 | 1 | NSAHXAPXSXPSPNPPSVGSVCR                    | 99.0 | 14 |                                     |
| 26c | 0.7 | 29  | 1639.8 | 1 | CANXNXXDYEVCR                              | 99.0 | 13 | Serine proteinase; ~ Q9DG84         |
|     |     |     | 1294.6 | 1 | XNXXDYEVCR                                 | 94.6 | 8  |                                     |
| 26d | 0.3 | 27  | 1639.8 | 1 | CANXNXXDYEVCR                              | 99.0 | 14 | Serine proteinase; ~ Q9DG84         |
|     |     |     | 1294.6 | 1 | XNXXDYEVCR                                 | 99.0 | 13 |                                     |
| 26e | 0.1 | 12  | 1401.8 | 1 | GBAEVWXGXWDK                               | 99.0 | 11 | C-type lectin/lectin-like; ~ Q9PSN0 |
|     |     |     | 1572.8 | 1 | EFCVEXVSXTGYR                              | 99.0 | 13 |                                     |
|     |     |     | 1241.6 | 1 | DFSWEWTDR                                  | 99.0 | 13 |                                     |
|     |     |     | 1369.7 | 1 | BDFSWEWTDR                                 | 98.5 | 9  |                                     |
| 27a | 1.1 | 52  |        |   | Nt: ADSRNPXEECFR                           |      |    | L-amino acid oxidase; ~ Q6STF1      |
|     |     |     | 1064.5 | 1 | NPXEECFR                                   | 99.0 | 11 |                                     |
|     |     |     | 1594.8 | 1 | DBEDWYANXGPMR                              | 99.0 | 17 |                                     |
|     |     |     | 1513.7 | 1 | ETNYEEFXEXAR                               | 99.0 | 18 |                                     |
|     |     |     | 2347.2 | 1 | XYFAGEYTABFHGWXDSTXK                       | 96.5 | 6  |                                     |
| 27b | 0.3 | 33  | 2260.2 | 1 | NSAHXAPXSXPSPNPPSVGSVCR                    | 99.0 | 9  | Serine proteinase; ~ P09872         |
| 27c | 0.3 | 29  | 1581.8 | 1 | CANXNXXDHAVCR                              | 99.0 | 9  | Serine proteinase; ~ ADP88561       |
| 27d | 0.1 | 18  | -      | - | unknown                                    | -    | -  |                                     |
| 28a | 0.2 | 52  | 1594.8 | 1 | DBEDWYANXGPMR                              | 99.0 | 12 | L-amino acid oxidase; ~ Q6STF1      |
|     |     |     | 1513.8 | 1 | ETNYEEFXEXAR                               | 99.0 | 13 |                                     |
|     |     |     | 1064.5 | 1 | NPXEECFR                                   | 98.1 | 8  |                                     |
| 28b | 0.3 | 40  | 1442.6 | 1 | DECDMADXCTGR                               | 99.0 | 14 | Metalloproteinase; ~ Q9DGB9         |
|     |     |     | 1368.7 | 1 | XYCFNSPENK                                 | 99.0 | 10 |                                     |
|     |     |     | 1734.0 | 1 | MYDXVNVXTPXYHR                             | 99.0 | 14 |                                     |
|     |     |     | 1803.8 | 1 | YFVEVGEECDGSPR                             | 99.0 | 13 |                                     |
|     |     |     | 1684.7 | 1 | GABCAEGXCCDBCR                             | 99.0 | 13 |                                     |
| 28c | 0.2 | 31  | 1803.7 | 1 | YFVEVGEECDGSPR                             | 99.0 | 11 | Metalloproteinase; ~ Q9DGB9         |
| 28d | 0.1 | 19  | -      | - | unknown                                    | -    | -  |                                     |
| 29a | 0.1 | 250 | -      | - | unknown                                    | -    | -  |                                     |
| 29b | 0.2 | 54  | 1064.5 | 1 | NPXEECFR                                   | 99.0 | 10 | L-amino acid oxidase; ~ P0C2D6      |
|     |     |     | 1513.8 | 1 | ETNYEEFXEXAR                               | 99.0 | 12 |                                     |

|     |     |    |        |   |                              |      |    |                                     |
|-----|-----|----|--------|---|------------------------------|------|----|-------------------------------------|
| 29c | 0.9 | 41 | 1734.0 | 1 | MYDXVNVXTPXYHR               | 99.0 | 18 | Metalloproteinase; ~ Q9DGB9         |
|     |     |    | 1803.8 | 1 | YFVEVGEECDGSPR               | 99.0 | 14 |                                     |
|     |     |    | 1684.7 | 1 | GABCAEGXCCDBCR               | 99.0 | 17 |                                     |
|     |     |    | 1368.7 | 1 | XYCFPNSPENK                  | 99.0 | 10 |                                     |
| 29d | 0.1 | 31 | 1803.8 | 1 | YFVEVGEECDGSPR               | 99.0 | 11 | Metalloproteinase; ~ Q9DGB9         |
|     |     |    | 1684.7 | 1 | GABCAEGXCCDBCR               |      |    |                                     |
| 30a | 0.1 | 64 | -      | - | unknown                      | -    | -  |                                     |
| 30b | 0.2 | 61 | 1064.5 | 1 | NPXEECFR                     | 99.0 | 8  | L-amino acid oxidase; ~ P0C2D6      |
|     |     |    | 1513.8 | 1 | ETNYEEFXEXAR                 | 99.0 | 16 |                                     |
| 30c | 0.6 | 45 | 1442.6 | 1 | DECDMADXCTGR                 | 99.0 | 15 | Metalloproteinase; ~ Q9DGB9         |
|     |     |    | 1368.7 | 1 | XYCFPNSPENK                  | 99.0 | 11 |                                     |
|     |     |    | 1734.0 | 1 | MYDXVNVXTPXYHR               | 99.0 | 15 |                                     |
|     |     |    | 1803.8 | 1 | YFVEVGEECDGSPR               | 99.0 | 13 |                                     |
|     |     |    | 1684.7 | 1 | GABCAEGXCCDBCR               | 99.0 | 13 |                                     |
| 30d | 0.2 | 35 | 1803.8 | 1 | YFVEVGEECDGSPR               | 99.0 | 9  | Metalloproteinase; ~ Q9DGB9         |
| 31a | 0.1 | 72 | 1983.9 | 1 | XTPGSBCADGVCCDBCR            | 94.2 | 6  | Metalloproteinase; ~ O42138         |
| 31b | 0.4 | 62 | 1699.9 | 1 | NBCXYFFGPNAAVAK              | 99.0 | 12 | Metalloproteinase; ~ O42138         |
|     |     |    | 2316.9 | 1 | DDCDMADXCTGBSAECPTDR         | 99.0 | 12 |                                     |
|     |     |    | 1983.8 | 1 | XTPGSBCADGVCCDBCR            | 98.9 | 9  |                                     |
| 31c | 0.3 | 57 | 1514.7 | 1 | ETDYEEFXEXAR                 | 99.0 | 11 | L-amino acid oxidase; ~ Q90W54      |
|     |     |    | 1064.5 | 1 | NPXEECFR                     | 98.0 | 7  |                                     |
| 31d | 0.3 | 44 | 1734.0 | 1 | MYDXVNVXTPXYHR               | 99.0 | 10 | Metalloproteinase; ~ Q9DGB9         |
|     |     |    | 1684.7 | 1 | GABCAEGXCCDBCR               | 99.0 | 9  |                                     |
|     |     |    | 1803.8 | 1 | YFVEVGEECDGSPR               | 99.0 | 12 |                                     |
|     |     |    | 1368.7 | 1 | XYCFPNSPENK                  | 97.6 | 7  |                                     |
| 31e | 0.2 | 33 | 1512.7 | 1 | VXGGDECNXNEHR                | 99.0 | 9  | Serine proteinase; ~ P09872         |
|     |     |    | 2856.4 | 1 | GDSGGPXXCNGBFBGXXSVGGNPCABPR | 99.0 | 12 |                                     |
|     |     |    | 2258.1 | 1 | NSAHXAPXSXPSNPPSVGSVCR       | 99.0 | 13 |                                     |
|     |     |    | 1189.6 | 1 | WBDXMXXR                     | 96.0 | 10 |                                     |
| 31f | 0.4 | 28 | 1401.7 | 1 | BWVHBMVNTMK                  | 99.0 | 13 | Metalloproteinase; ~ Q92032         |
|     |     |    | 1313.7 | 1 | YVEXVXVADHR                  | 99.0 | 10 |                                     |
|     |     |    | 1384.7 | 1 | Q <sup>py</sup> WVHBMVNTMK   | 97.1 | 5  |                                     |
| 31g | 0.1 | 16 | 1401.7 | 1 | GBAEVWXGXWDK                 | 99.0 | 14 | C-type lectin/lectin-like; ~ Q9PSN0 |
|     |     |    | 1572.8 | 1 | EFCVEXVSXTGYR                | 99.0 | 15 |                                     |
|     |     |    | 1241.6 | 1 | DFSWEWTDR                    | 99.0 | 11 |                                     |
| 32a | 0.2 | 58 | 1513.8 | 1 | ETDYEEFXEXAR                 | 99.0 | 14 | L-amino acid oxidase; ~ Q90W54      |
| 32b | 0.3 | 41 | -      | - | unknown                      | -    | -  |                                     |

|     |     |    |        |   |                                  |      |    |                                |
|-----|-----|----|--------|---|----------------------------------|------|----|--------------------------------|
| 32c | 2.8 | 26 | 1187.6 | 1 | TPEBBGFPBR                       | 99.0 | 11 | Metalloproteinase; ~ Q92031    |
|     |     |    | 1313.8 | 1 | YVEXVXVADHR                      | 99.0 | 13 |                                |
|     |     |    | 1638.9 | 1 | BXNXTPEBBGFPBR                   | 96.6 | 9  |                                |
| 32d | 1.4 | 24 | 1913.1 | 1 | BWVHBXVNTXNEXYR                  | 99.0 | 14 | Metalloproteinase; ~ P28891    |
|     |     |    | 3122.6 | 1 | HDNABXXTAXDFDGTVGXAYVGGMCBXX     | 99.0 | 12 |                                |
|     |     |    | 1576.8 | 1 | SVSHDTXASFGNWR                   | 99.0 | 12 |                                |
|     |     |    | 1312.8 | 1 | YVBXVXVADHR                      | 99.0 | 12 |                                |
|     |     |    | 1187.6 | 1 | TPEBBGFPBR                       | 99.0 | 14 |                                |
| 33a | 0.6 | 57 | 1513.8 | 1 | ETNYEEFXEXAR                     | 99.0 | 14 | L-amino acid oxidase; ~ P0C2D6 |
| 33b | 7.2 | 23 | 2564.4 | 1 | XSHDNABXXTAXEXDGETXGXANR         | 99.0 | 17 | Metalloproteinase; ~ P28891    |
|     |     |    | 1576.8 | 1 | SVSHDTXASFGNWR                   | 99.0 | 14 |                                |
|     |     |    | 2506.5 | 1 | BWVHBXVNTXNEXYRPNXR              | 99.0 | 12 |                                |
|     |     |    | 2165.1 | 1 | DYBTFXTVNNPBCXXNBP               | 99.0 | 16 |                                |
|     |     |    | 1312.8 | 1 | YVBXVXVADHR                      | 99.0 | 13 |                                |
| 34a | 0.9 | 57 | 1064.5 | 1 | NPXEECFR                         | 99.0 | 8  | L-amino acid oxidase; ~ P0C2D6 |
|     |     |    | 1513.8 | 1 | ETNYEEFXEXAR                     | 99.0 | 14 |                                |
| 34b | 2.3 | 33 | 1187.6 | 1 | TPEBBGFPBR                       | 99.0 | 11 | Metalloproteinase; ~ Q9IAB0    |
| 34c | 2.4 | 26 | 1187.6 | 1 | TPEBBGFPBR                       | 99.0 | 13 | Metalloproteinase; ~ Q92031    |
|     |     |    | 3786.9 | 1 | VAXXMAHEXGHNXGMGHDDNSCTCGGYSCXXM | 99.0 | 8  |                                |
|     |     |    | 1313.8 | 1 | PR<br>YVEXVXVADHR                | 99.0 | 13 |                                |
| 34d | 4.6 | 22 | 1313.8 | 1 | YVEXVXVADHR                      | 99.0 | 10 | Metalloproteinase; ~ B7U492    |
|     |     |    | 2297.3 | 1 | BSHDNABXXTAXVFDEGXXGR            | 99.0 | 15 |                                |
|     |     |    | 2169.2 | 1 | SHDNABXXTAXVFDEGXXGR             | 99.0 | 29 |                                |
| 34e | 1.1 | 17 | 1313.8 | 1 | YVEXVXVADHR                      | 99.0 | 7  | Metalloproteinase; ~ Q92031    |
|     |     |    | 1187.6 | 1 | TPEBBGFPBR                       | 99.0 | 11 |                                |
| 34f | 1.6 | 14 | 1313.8 | 1 | YVEXVXVADHR                      | 99.0 | 11 | Metalloproteinase; ~ B7U492    |
|     |     |    | 2169.3 | 1 | SHDNABXXTAXVFDEGXXGR             | 99.0 | 15 |                                |
|     |     |    | 1187.6 | 1 | TPEBBGFPBR                       | 98.8 | 9  |                                |
| 35a | 0.3 | 57 | 1514.8 | 1 | ETDYEEFXEXAR                     | 99.0 | 7  | L-amino acid oxidase; ~ Q90W54 |
| 35b | 0.4 | 44 | 1514.8 | 1 | ETDYEEFXEXAR                     | 99.0 | 7  | L-amino acid oxidase; ~ Q90W54 |
| 35c | 5.1 | 23 | 1327.8 | 1 | YVEXVXXADHR                      | 99.0 | 11 | Metalloproteinase; ~ B7U492    |
|     |     |    | 1201.6 | 1 | APXAGMCDPNR                      | 99.0 | 8  |                                |
| 35d | 0.5 | 12 | 1327.8 | 1 | YVEXVXXADHR                      | 97.1 | 8  | Metalloproteinase; ~ B7U492    |

---

Figure 2E

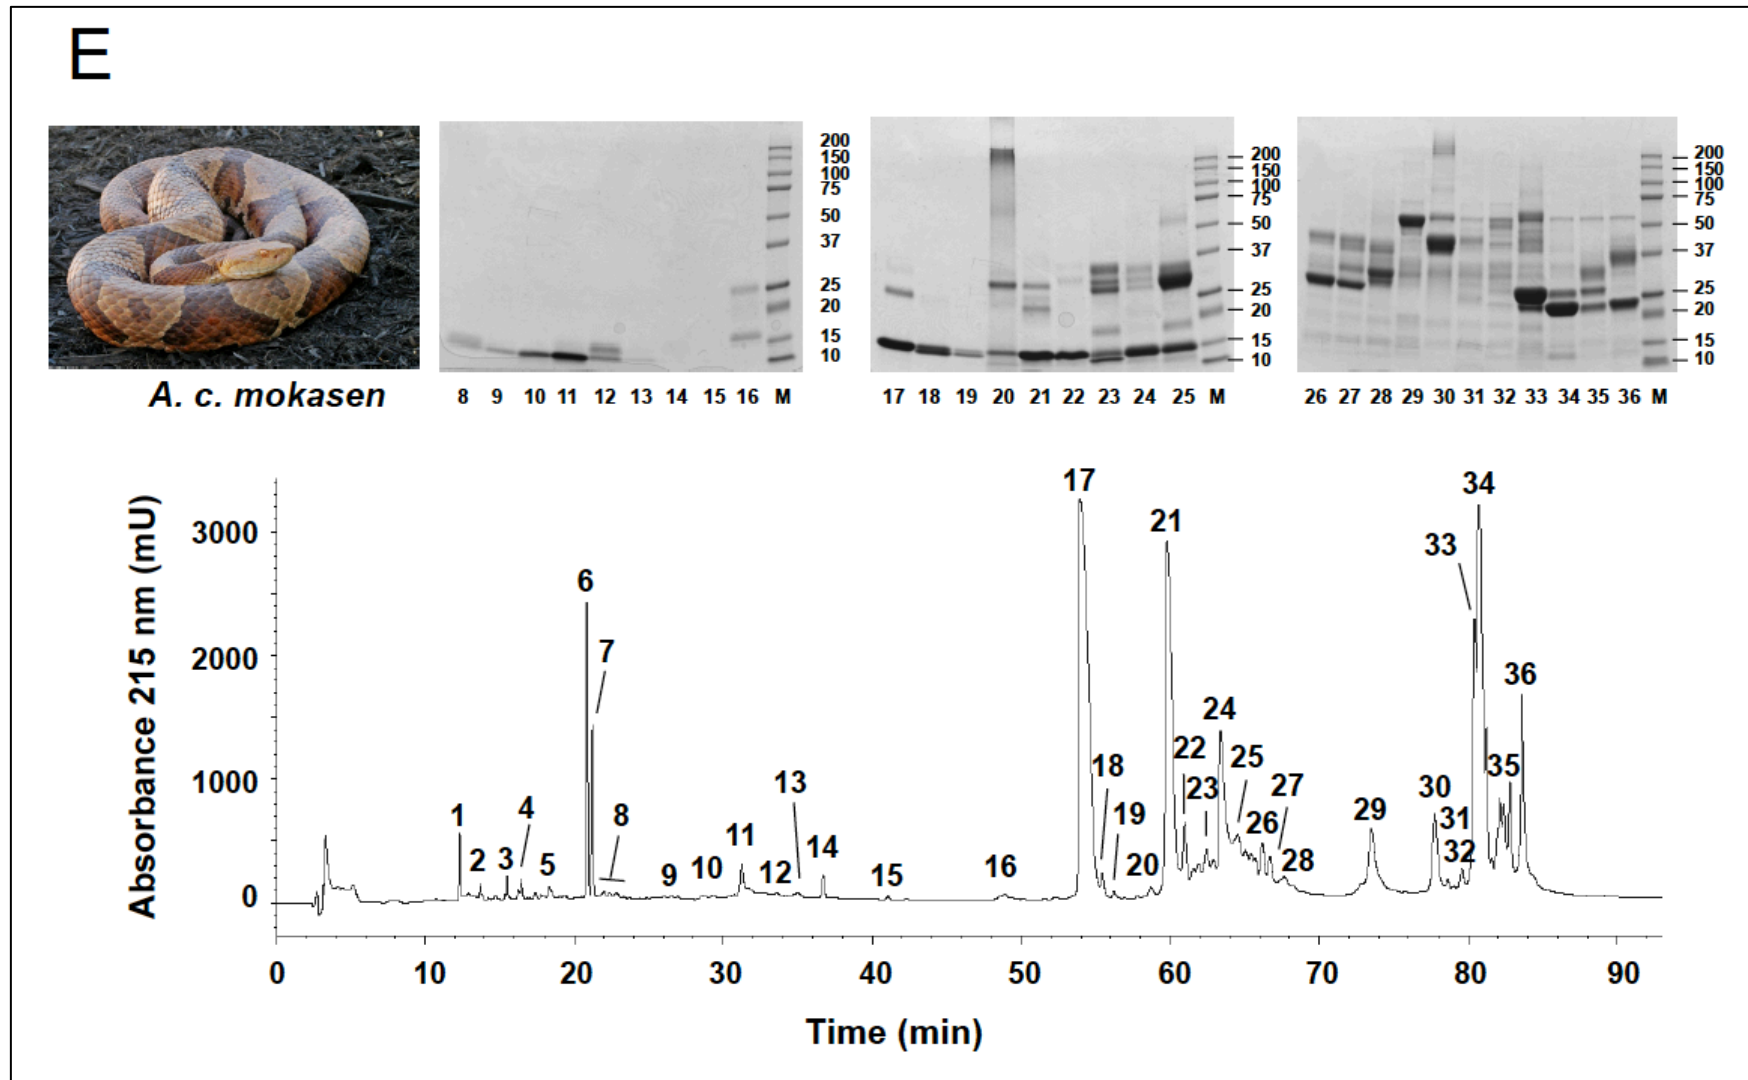

**Table S5:** Assignment of the RP-HPLC isolated fractions of *Agkistrodon contortrix mokasen* venom to protein families by MALDI-TOF-TOF or nESI-MS-MS of selected peptide ions from in-gel trypsin-digested protein bands from the SDS-PAGE shown in Fig.2E. \* Cysteine residues are carbamidomethylated. X: Leu/Ile; B: Lys/Gln; Z, pyroglutamate (2-oxo-pyrrolidone carboxylic acid). <sup>ox</sup>: oxidized; <sup>da</sup>: deamidated; <sup>kyn</sup>: kynurenine. Mass estimations by SDS-PAGE (reducing conditions) are indicated in kDa. Confidence (Conf) and Score (Sc) values are calculated by the Paragon algorithm of ProteinPilot<sup>®</sup>.

| Peak | %   | Mass, kDa | Peptide ion |   | MS/MS-derived sequence | Conf (%) | Sc | Protein family; ~ related protein *              |
|------|-----|-----------|-------------|---|------------------------|----------|----|--------------------------------------------------|
|      |     |           | m/z         | z |                        |          |    |                                                  |
| 1    | 0.5 | -         | 385.3       | 1 | TPPA                   | -        | -  | BIP; P85025<br>Fragment NGF-β; ACC85799          |
|      |     |           | 470.2       | 1 | ZSPR                   |          |    |                                                  |
| 2    | 0.1 | -         | 440.2       | 1 | PARP                   | -        | -  | Fragment 3FTx; ~ ABG27005                        |
| 3    | 0.1 | -         | 539.3       | 1 | TAGP                   | -        | -  | -                                                |
|      |     |           | 556.2       | 1 | NPXTPE                 |          |    |                                                  |
| 4    | 0.2 | -         | 449.3       | 1 | ZBW <sup>kyn</sup>     | -        | -  | SVMP inhibitor; P01021                           |
| 5    | 0.3 | -         | 532.3       | 2 | TPPAGPDVGPR            | -        | -  | BIP; P85025                                      |
| 6    | 2.8 | -         | 430.1       | 1 | ZNW                    | -        | -  | SVMP inhibitor; P01021                           |
| 7    | 1.8 | -         | 444.1       | 1 | ZBW                    | -        | -  | SVMP inhibitor; P01021<br>SVMP inhibitor; P01021 |
|      |     |           | 466.1       | 1 | ZBW+Na                 |          |    |                                                  |
| 8    | 0.2 | 11        | -           | - | unknown                | -        | -  | -                                                |
| 9    | 0.3 | 10        | 1884.8      | 1 | GDDXDDYCNGXSAGCPR      | 99.0     | 7  | Disintegrin; ~ Q9IAB0                            |
|      |     |           | 2111.9      | 1 | ARGDDXDDYCNGXSAGCPR    | 99.0     | 10 |                                                  |
|      |     |           | 1983.8      | 1 | XTPGSBCAEGXCCDBCK      | 99.0     | 12 |                                                  |
| 10   | 0.4 | 10        | 1983.8      | 1 | XTPGSBCAEGXCCDBCK      | 99.0     | 18 | Disintegrin; ~ Q805F4                            |
|      |     |           | 1884.8      | 1 | GDDXDDYCNGXSAGCPR      | 99.0     | 13 |                                                  |
|      |     |           | 2111.9      | 1 | ARGDDXDDYCNGXSAGCPR    | 99.0     | 16 |                                                  |
| 11   | 0.9 | 10        | 1550.6      | 1 | DAPANPCCDAATCK         | 99.0     | 10 | Disintegrin; ~ Q9IAB0                            |
|      |     |           | 1973.8      | 1 | XTTGSBCADGXCCDBCK      | 99.0     | 16 |                                                  |
|      |     |           | 1884.7      | 1 | GDDXDDYCNGXSAGCPR      | 99.0     | 20 |                                                  |
|      |     |           | 2111.9      | 1 | ARGDDXDDYCNGXSAGCPR    | 99.0     | 19 |                                                  |
|      |     |           | 1196.4      | 1 | NPCCDAATCK             | 99.0     | 12 |                                                  |
|      |     |           | 1137.4      | 1 | CTGBSGDCPR             | 99.0     | 12 |                                                  |
|      |     |           | 1983.8      | 1 | XTPGSBCAEGXCCDBCK      | 99.0     | 27 |                                                  |
| 12a  | 0.3 | 12        | 2123.7      | 1 | YSWVBCESGECDCBCR       | 99.0     | 8  | Disintegrin; ~ P0C6E3                            |
| 12b  | 0.3 | 9         | 2520.0      | 1 | SPPVCGNDXXEVGEECDGCGPR | 99.0     | 12 | Disintegrin; ~ P0C6E3                            |

|     |      |     |        |   |                                      |      |    |                                             |
|-----|------|-----|--------|---|--------------------------------------|------|----|---------------------------------------------|
|     |      |     | 2123.8 | 1 | YSWVBCESGECDCBCR                     | 99.0 | 10 |                                             |
|     |      |     | 1983.8 | 1 | XTPGSBCAEGXCCDBCK                    | 99.0 | 10 |                                             |
|     |      |     | 1884.8 | 1 | GDDXDDYCNGXSAGCPR                    | 97.1 | 6  |                                             |
|     |      |     | 2111.9 | 1 | ARGDDXDDYCNGXSAGCPR                  | 99.0 | 14 |                                             |
| 13  | 0.3  | 9   | -      | - | unknown                              | -    | -  | -                                           |
| 14  | 0.5  | -   | -      | - | unknown                              | -    | -  | -                                           |
| 15  | 0.1  | -   | -      | - | unknown                              | -    | -  | -                                           |
| 16a | 0.2  | 25  | 1695.8 | 1 | FXR XDSACVCVXSR                      | 99.0 | 9  | Nerve growth factor; ~ Q9DEZ9               |
|     |      |     | 1111.5 | 1 | NPNPVPTGCR                           | 99.0 | 9  |                                             |
|     |      |     | 1363.6 | 1 | AXTMEGNBASWR                         | 99.0 | 11 |                                             |
|     |      |     | 1758.8 | 1 | HWNSYCTTTNTFVK                       | 99.0 | 21 |                                             |
| 16b | 0.2  | 15  | 1111.5 | 1 | NPNPVPTGCR                           | 99.0 | 11 | Nerve growth factor; ~ Q9DEZ9               |
|     |      |     | 1363.6 | 1 | AXTMEGNBASWR                         | 99.0 | 14 |                                             |
|     |      |     | 1758.8 | 1 | HWNSYCTTTNTFVK                       | 99.0 | 21 |                                             |
| 17a | 4.7  | 25  | 850.3  | 1 | CCFVHK                               | 86.3 | 7  | Phospholipase A <sub>2</sub> , K49; ~P49121 |
| 17b | 16.7 | 14  | 2732.1 | 1 | EMCECDBAVAXCXRENXDITYNK              | 99.0 | 9  | Phospholipase A <sub>2</sub> , K49; ~P49121 |
|     |      |     | 2860.3 | 1 | EMCECDBAVAXCXRENXDITYNBK             | 99.0 | 9  |                                             |
|     |      |     | 1104.5 | 1 | DRYSYSWK                             | 99.0 | 13 |                                             |
|     |      |     | 1754.7 | 1 | EMCECDBAVAXCXR                       | 99.0 | 19 |                                             |
|     |      |     | 1408.6 | 1 | DATDRCCFVHK                          | 99.0 | 10 |                                             |
|     |      |     | 2003.8 | 1 | NAXTSYGSYGCNCGWGHR                   | 98.4 | 10 |                                             |
| 18a | 0.1  | 13  | 1754.7 | 1 | EMCECDBAVAXCXR                       | 99.0 | 12 | Phospholipase A <sub>2</sub> , K49; ~P49121 |
|     |      |     | 1104.5 | 1 | DRYSYSWK                             | 99.0 | 13 |                                             |
|     |      |     | 1408.6 | 1 | DATDRCCFVHK                          | 99.0 | 11 |                                             |
|     |      |     | 850.3  | 1 | CCFVHK                               | 98.3 | 7  |                                             |
| 18b | 0.4  | 12  | 1754.7 | 1 | EMCECDBAVAXCXR                       | 99.0 | 12 | Phospholipase A <sub>2</sub> , K49; ~P49121 |
|     |      |     | 1408.6 | 1 | DATDRCCFVHK                          | 99.0 | 6  |                                             |
|     |      |     | 1104.5 | 1 | DRYSYSWK                             | 99.0 | 11 |                                             |
|     |      |     | 850.3  | 1 | CCFVHK                               | 98.0 | 7  |                                             |
| 19  | 0.3  | 13  | 1754.7 | 1 | EMCECDBAVAXCXR                       | 99.0 | 8  | Phospholipase A <sub>2</sub> , K49; ~P49121 |
|     |      |     | 1408.6 | 1 | DATDRCCFVHK                          | 99.0 | 7  |                                             |
|     |      |     | 1104.5 | 1 | DRYSYSWK                             | 99.0 | 11 |                                             |
|     |      |     | 850.3  | 1 | CCFVHK                               | 95.2 | 7  |                                             |
| 20a | 0.2  | 250 | 1479.8 | 1 | XGEYGFBNAXXVR                        | 99.0 | 10 | Serum albumin (mammalian - contaminant)     |
|     |      |     | 1609.7 | 1 | DVFXGTFXYEYSR                        | 99.0 | 16 |                                             |
|     |      |     | 1910.9 | 1 | RPCFSAXEVDETYVPK                     | 96.9 | 7  |                                             |
| 20b | 0.2  | 27  | 2135.0 | 1 | SAHXAP <sup>ox</sup> XSPSPPSVGSVCR   | 99.0 | 13 | Serine proteinase; ~ Q7T229                 |
|     |      |     | 2515.1 | 1 | FHCSGTXXNBEWVXTAAN <sup>da</sup> CDR | 99.0 | 11 |                                             |

|     |     |    |        |   |                                                      |      |    |                                              |
|-----|-----|----|--------|---|------------------------------------------------------|------|----|----------------------------------------------|
|     |     |    | 1189.6 | 1 | WDBDXMXXR                                            | 98.9 | 10 |                                              |
|     |     |    | 1526.6 | 1 | XXGGDECXNEHR                                         | 99.0 | 15 |                                              |
|     |     |    | 1129.6 | 1 | FXVAXYTFR                                            | 98.8 | 10 |                                              |
| 20c | 0.1 | 13 | 1505.5 | 1 | CCFVHDCCYGK                                          | 99.0 | 15 | Phospholipase A <sub>2</sub> ; ~ Q9PVF2      |
| 21a | 1.9 | 27 | 1129.6 | 1 | FXVAXYTFR                                            | 98.6 | 9  | Serine proteinase; ~ Q9DF68                  |
| 21b | 1.9 | 20 | 2446.1 | 1 | YGXGADPPNAVXGHFTBXVWYK                               | 99.0 | 10 | CRISP; ~ Q7ZT99                              |
|     |     |    | 1325.5 | 1 | SXVBBYGCBDK                                          | 99.0 | 6  | Serine proteinase; ~ Q7ZT99                  |
|     |     |    | 2508.9 | 1 | SGPPCGDCPSACVNGXCTNPCTK                              | 99.0 | 13 |                                              |
|     |     |    | 1066.6 | 1 | XVDXHNSXR                                            | 99.0 | 8  |                                              |
|     |     |    | 1537.6 | 1 | MEWYPEAAAANAER                                       | 99.0 | 13 |                                              |
|     |     |    | 1975.9 | 1 | SVDFDSESPRBPEXBNK                                    | 99.0 | 13 |                                              |
| 21c | 9.9 | 12 | 2283.9 | 1 | EAVHSYAXYGCYCGWGGBGR                                 | 99.0 | 8  | Phospholipase A <sub>2</sub> ; ~ A60512      |
|     |     |    | 1505.5 | 1 | CCFVHDCCYGK                                          | 99.0 | 14 |                                              |
| 22  | 1.8 | 12 | 1859.8 | 1 | AAAXCFRDNXDITYNSK                                    | 99.0 | 20 | Phospholipase A <sub>2</sub> ; ~ P00625      |
|     |     |    | 1505.5 | 1 | CCFVHDCCYGK                                          | 99.0 | 17 |                                              |
| 23a | 0.4 | 31 | 2562.2 | 1 | TFXCGGTXXNBEVWXTAHCDR                                | 99.0 | 13 | Serine proteinase; ~ P85109                  |
|     |     |    | 1512.7 | 1 | VXGGDECXNEHR                                         | 99.0 | 10 |                                              |
|     |     |    | 2856.4 | 1 | GDSGGPXXCNGBFBGXXSVGGNPCABPR                         | 99.0 | 25 |                                              |
|     |     |    | 1526.7 | 1 | XXGGDECXNEHR                                         | 99.0 | 9  |                                              |
|     |     |    | 2578.2 | 1 | ETYPDVPHCANXNXXDYEVCR                                | 99.0 | 18 |                                              |
| 23b | 0.1 | 27 | 1189.6 | 1 | WDBDXMXXR                                            | 99.0 | 10 | Serine proteinase; ~ Q71QJ1                  |
|     |     |    | 1498.7 | 1 | VVGGDECXNEHR                                         | 96.0 | 6  |                                              |
| 23c | 0.4 | 25 | 1512.7 | 1 | VXGGDECXNEHR                                         | 99.0 | 12 | Serine proteinase; ~ Q072L6                  |
|     |     |    | 2494.1 | 1 | ETYPDVPHCANXNXXDHAVCR                                | 99.0 | 19 |                                              |
|     |     |    | 1498.7 | 1 | VVGGDECXNEHR                                         | 99.0 | 8  |                                              |
|     |     |    | 1307.6 | 1 | NFBMXFGVHSK                                          | 99.0 | 18 |                                              |
| 23d | 0.1 | 17 | 1189.7 | 1 | WDBDXMXXR                                            | 99.0 | 12 | Serine proteinase; ~ P09872                  |
|     |     |    | 2258.1 | 1 | NSAHXAPXSXPS <sup>dh</sup> NP <sup>ox</sup> PSVGSVCR | 99.0 | 14 |                                              |
| 23e | 0.4 | 13 | 1241.5 | 1 | DFSWEWTDNR                                           | 99.0 | 8  | C-type lectin/lectin-like; ~ Q9YGP1          |
|     |     |    | 1498.7 | 1 | VVGGDECXNEHR                                         | 99.0 | 9  | Serine proteinase; ~ Q9YGJ8                  |
|     |     |    | 1505.5 | 1 | CCFVHDCCYGK                                          | 99.0 | 13 | Phospholipase A <sub>2</sub> , D49; ~ Q9PVF2 |
| 23f | 0.4 | 10 | 3026.5 | 1 | NVGVPBVVPDNPFRN <sup>da</sup> SSPCVXGSPGFR           | 99.0 | 17 | Ohanin-like; ~ Q27J48                        |
|     |     |    | 2201.1 | 1 | ADVTFDSNTAFSSXVVSANBK                                | 99.0 | 23 |                                              |
|     |     |    | 2357.2 | 1 | RADVTFDSNTAFSSXVVSANBK                               | 99.0 | 20 |                                              |
|     |     |    | 1525.7 | 1 | FN <sup>de</sup> SSPCVXGSPGFR                        | 99.0 | 17 |                                              |

|     |     |     |        |   |                              |      |    |                                              |
|-----|-----|-----|--------|---|------------------------------|------|----|----------------------------------------------|
| 24  | 6.1 | 13  | 2216.9 | 1 | SGXWYYGSYGCYCGAGGBGR         | 99.0 | 13 | Phospholipase A <sub>2</sub> , D49; ~ Q7SID6 |
|     |     |     | 1505.5 | 1 | CCFVHDCCYGK                  | 99.0 | 15 |                                              |
| 25a | 1.7 | 28  | 1189.6 | 1 | WDBDXMXXR                    | 99.0 | 10 | Serine proteinase; ~ P09872                  |
|     |     |     | 1498.7 | 1 | VVGGDECXNEHR                 | 99.0 | 12 |                                              |
| 25b | 0.2 | 18  | 1097.6 | 1 | FXAXVYTDR                    | 99.0 | 8  | Serine proteinase; ~ Q71Q13                  |
| 25c | 1.1 | 13  | 1505.5 | 1 | CCFVHDCCYGK                  | 99.0 | 18 | Phospholipase A <sub>2</sub> , D49; ~ Q7SID6 |
|     |     |     | 2216.9 | 1 | SGXWYYGSYGCYCGAGGBGR         | 99.0 | 12 |                                              |
| 26a | 0.5 | 44  | 1761.9 | 1 | XXCAGVXEGGXDTCBR             | 99.0 | 19 | Serine proteinase; ~ Q9PSN3                  |
|     |     |     | 2317.2 | 1 | NSEHXAPXSXPSSPPXVGSVCR       | 99.0 | 24 |                                              |
|     |     |     | 1189.6 | 1 | WDBDXMXXR                    | 99.0 | 11 |                                              |
|     |     |     | 2217.0 | 1 | DSGGPXXCNGBFBGXVSWGPK        | 99.0 | 23 |                                              |
|     |     |     | 1512.7 | 1 | VXGGDECXNEHR                 | 99.0 | 24 |                                              |
| 26b | 1.1 | 29  | 1468.8 | 1 | XXNEDEBXRNP                  | 99.0 | 17 | Serine proteinase; ~ Q8AY79                  |
|     |     |     | 1596.8 | 1 | BXXNEDEBXRNP                 | 99.0 | 16 |                                              |
|     |     |     | 1498.6 | 1 | VVGGDECXNEHR                 | 99.0 | 18 |                                              |
|     |     |     | 1097.6 | 1 | FXAXVYTDR                    | 99.0 | 11 |                                              |
| 27a | 0.4 | 42  | 1761.8 | 1 | XXCAGVXEGGXDTCBR             | 99.0 | 13 | Serine proteinase; ~ Q9PSN3                  |
|     |     |     | 2317.1 | 1 | NSEHXAPXSXPSSPPXVGSVCR       | 99.0 | 22 |                                              |
|     |     |     | 2217.0 | 1 | DSGGPXXCNGBFBGXVSWGPK        | 99.0 | 25 |                                              |
|     |     |     | 1189.6 | 1 | WDBDXMXXR                    | 97.0 | 8  |                                              |
|     |     |     | 1512.6 | 1 | VXGGDECXNEHR                 | 99.0 | 12 |                                              |
| 27b | 0.2 | 32  | 1746.9 | 1 | BBDDEBDBDXMXXR               | 99.0 | 8  | Serine proteinase; ~ Q2QA04                  |
|     |     |     | 1512.6 | 1 | VXGGDECXNEHR                 | 99.0 | 9  |                                              |
| 27c | 0.6 | 27  | 1468.7 | 1 | XXNEDEBXRNP                  | 99.0 | 17 | Serine proteinase; ~ Q8AY79                  |
|     |     |     | 1596.8 | 1 | BXXNEDEBXRNP                 | 99.0 | 18 |                                              |
|     |     |     | 1498.6 | 1 | VVGGDECXNEHR                 | 99.0 | 15 |                                              |
| 28a | 0.1 | 39  | -      | - | unknown                      | -    | -  | -                                            |
| 28b | 0.4 | 30  | 1746.8 | 1 | BBDDEBDBDXMXXR               | 99.0 | 18 | Serine proteinase; ~ Q2QA04                  |
|     |     |     | 1512.6 | 1 | VXGGDECXNEHR                 | 99.0 | 15 |                                              |
| 28c | 0.3 | 28  | 2916.3 | 1 | XDRPVSNSAHXAPXSXPSSPPSVGSVCR | 99.0 | 11 | Serine proteinase; ~ Q9YGJ9                  |
| 29a | 3.1 | 53  | 1514.6 | 1 | ETDYEEFXEXAR                 | 99.0 | 16 | L-amino acid oxidase; ~ Q6STF1               |
|     |     |     | 1594.7 | 1 | DBEDWYANXGPMR                | 99.0 | 15 |                                              |
|     |     |     | 2560.1 | 1 | NPXEFCFRETDYEEFXEXAR         | 99.0 | 10 |                                              |
|     |     |     | 2347.1 | 1 | XYFAGEYTABFHGWXDSTXK         | 99.0 | 13 |                                              |
| 29b | 0.5 | 30  | 1512.6 | 1 | VXGGDECXNEHR                 | 98.9 | 7  | Serine proteinase; ~ P09872                  |
| 30a | 0.2 | 250 | 1368.6 | 1 | XYCFPNSPENK                  | 95.7 | 5  | Metalloproteinase; ~ Q9DGB9                  |
| 30b | 0.5 | 56  | -      | - | unknown                      | -    | -  | -                                            |



|     |     |    |        |   |                                       |      |    |                                |
|-----|-----|----|--------|---|---------------------------------------|------|----|--------------------------------|
| 30c | 1.9 | 40 | 1733.9 | 1 | MYDXVNVXTPXYHR                        | 99.0 | 13 | Metalloproteinase; ~ Q9DGB9    |
|     |     |    | 1137.4 | 1 | E <sup>py</sup> GNHYGYCR              | 99.0 | 9  |                                |
|     |     |    | 1684.6 | 1 | GABCAEGXCCDBCR                        | 99.0 | 16 |                                |
|     |     |    | 1269.5 | 1 | SAECTDRFBR                            | 99.0 | 9  |                                |
|     |     |    | 1712.7 | 1 | PASSECDMADXCTGR                       | 99.0 | 11 |                                |
| 30d | 0.2 | 31 | 1684.6 | 1 | GABCAEGXCCDBCR                        | 98.2 | 7  | Metalloproteinase; ~ Q9DGB9    |
| 31a | 0.1 | 55 | 1064.5 | 1 | NPXEECFR                              | 99.0 | 6  | L-amino acid oxidase; ~ Q90W54 |
|     |     |    | 1514.7 | 1 | ETDYEEFXEXAR                          | 99.0 | 8  |                                |
| 31b | 0.1 | 42 | 1733.8 | 1 | MYDXVNVXTPXYHR                        | 99.0 | 9  | Metalloproteinase; ~ Q9DGB9    |
|     |     |    | 1684.6 | 1 | GABCAEGXCCDBCR                        | 99.0 | 11 |                                |
| 31c | 0.2 | 30 | 1512.7 | 1 | VXGGDECNXNEHR                         | 99.0 | 7  | Serine proteinase; ~ Q9PTL3    |
| 31d | 0.1 | 24 | -      | - | unknown                               | -    | -  | -                              |
| 32a | 0.3 | 54 | 2347.1 | 1 | XYFAGEYTABFHGWXDSTXK                  | 99.0 | 11 | L-amino acid oxidase; ~ P56742 |
|     |     |    | 1514.6 | 1 | ETDYEEFXEXAR                          | 99.0 | 10 |                                |
| 32b | 0.2 | 49 | 1503.6 | 1 | YBEEFNFXN <sup>da</sup> K             | 96.7 | 12 | Metalloproteinase; ~ Q92043    |
|     |     |    | 2658.0 | 1 | SECDXAESCTGBSADCPTDDFHR               | 99.0 | 16 |                                |
|     |     |    | 2225.8 | 1 | XHSWVECESGECCEBCR                     | 99.0 | 15 |                                |
| 32c | 0.1 | 40 | -      | - | unknown                               | -    | -  | -                              |
| 32d | 0.2 | 32 | 2856.3 | 1 | GDSGGPXXCNGBFBGXXSVGGNPCABPR          | 99.0 | 11 | Serine proteinase; ~ P09872    |
|     |     |    | 1512.6 | 1 | VXGGDECNXNEHR                         | 99.0 | 9  |                                |
|     |     |    | 2250.1 | 1 | NSAHXAPXSXP <sup>ox</sup> SNPPSVGSVCR | 99.0 | 17 |                                |
| 32e | 0.2 | 30 | 1498.6 | 1 | VVGGDECNXNEHR                         | 99.0 | 10 | Serine proteinase; ~ P09872    |
| 33a | 0.8 | 56 | 1815.8 | 1 | YVEFVVVDHGM <sup>ox</sup> YTK         | 99.0 | 8  | Metalloproteinase; ~ Q42138    |
|     |     |    | 1983.7 | 1 | XTPGSBCADGVCCDBCR                     | 99.0 | 10 |                                |
| 33b | 0.4 | 42 | 1313.7 | 1 | YVEXVXVADHR                           | 99.0 | 14 | Metalloproteinase; ~ Q92043    |
| 33c | 2.7 | 24 | 1313.7 | 1 | YVEXVXVADHR                           | 99.0 | 15 | Metalloproteinase; ~ Q92043    |
|     |     |    | 1438.7 | 1 | SHDNABXXTAXK                          | 95.5 | 10 |                                |
| 33d | 0.8 | 22 | 2202.0 | 1 | DXXNVBPAAADTXEAFGDWR                  | 99.0 | 13 | Metalloproteinase; ~ Q805F6    |
|     |     |    | 1418.7 | 1 | VSXTDXEVWSNR                          | 99.0 | 12 |                                |
|     |     |    | 2564.3 | 1 | XSHDNABXXTAXEXDGETXGXANR              | 99.0 | 23 |                                |
|     |     |    | 2165.0 | 1 | DYBTFXTVNNPBCXXNBP                    | 99.0 | 10 |                                |
|     |     |    | 2293.1 | 1 | BDYBTFXTVNNPBCXXNBP                   | 99.0 | 12 |                                |
|     |     |    | 1312.7 | 1 | YVBXVXVADHR                           | 99.0 | 12 |                                |
| 34a | 0.6 | 55 | 1514.6 | 1 | ETDYEEFXEXAR                          | 99.0 | 14 | L-amino acid oxidase; ~ Q90W54 |
|     |     |    | 1064.4 | 1 | NPXEECFR                              | 98.1 | 6  |                                |
| 34b | 3.3 | 25 | 1313.7 | 1 | YVEXVXVADHR                           | 99.0 | 15 | Metalloproteinase; ~ Q92043    |

|     |      |    |        |   |                            |      |    |                                |
|-----|------|----|--------|---|----------------------------|------|----|--------------------------------|
| 34c | 10.2 | 21 | 2165.0 | 1 | DYBTFXTVNNPBCXXNBP         | 99.0 | 20 | Metalloproteinase; ~ P28891    |
|     |      |    | 2293.1 | 1 | BDYBTFXTVNNPBCXXNBP        | 99.0 | 23 |                                |
|     |      |    | 1312.7 | 1 | YVBXVXVADHR                | 99.0 | 15 |                                |
|     |      |    | 2564.2 | 1 | XSHDNABXXTAXEXDGETXGXANR   | 99.0 | 10 |                                |
| 35a | 1.7  | 56 | 1514.7 | 1 | ETDYEEFXEXAR               | 99.0 | 8  | L-amino acid oxidase; ~ Q90W54 |
| 35b | 0.4  | 31 | 1313.7 | 1 | YVEXVXVADHR                | 99.0 | 14 | Metalloproteinase; ~ Q92043    |
| 35c | 2.2  | 26 | 1313.7 | 1 | YVEXVXVADHR                | 99.0 | 8  | Metalloproteinase; ~ Q92043    |
|     |      |    | 1120.6 | 1 | GXSAXGP <sup>ox</sup> AYBK | 98.1 | 13 |                                |
| 35d | 1.5  | 22 | 2297.1 | 1 | BSHDNABXXTAXVFDEGXXGR      | 99.0 | 25 | Metalloproteinase; ~ Q9IAB0    |
|     |      |    | 2169.0 | 1 | SHDNABXXTAXVFDEGXXGR       | 99.0 | 25 |                                |
|     |      |    | 2564.2 | 1 | XSHDNABXXTAXEXDGETXGXANR   | 99.0 | 7  |                                |
|     |      |    | 1312.7 | 1 | YVBXVXVADHR                | 99.0 | 13 |                                |
| 36a | 0.3  | 56 | 1514.7 | 1 | ETDYEEFXEXAR               | 99.0 | 7  | L-amino acid oxidase; ~ Q90W54 |
|     |      |    | 2347.1 | 1 | XYFAGEYTABFHGWXDSTXK       | 99.0 | 7  |                                |
| 36b | 2.3  | 36 | 2046.0 | 1 | YNPYBYXEXFXVVDNR           | 99.0 | 7  | Metalloproteinase; ~ P0C6E3    |
|     |      |    | 1380.7 | 1 | YXEXFXVVDNR                | 99.0 | 12 |                                |
|     |      |    | 2123.7 | 1 | YSWVBCESGECDCBCR           | 99.0 | 9  |                                |
|     |      |    | 1651.9 | 1 | XYEXVNXXNEXYR              | 99.0 | 10 |                                |
| 36c | 2.6  | 23 | 1864.9 | 1 | XFSDCSBBDYXTFXK            | 99.0 | 12 | Metalloproteinase; ~ B7U492    |
|     |      |    | 1327.7 | 1 | YVEXVXXADHR                | 99.0 | 15 |                                |

---

Figure 3A

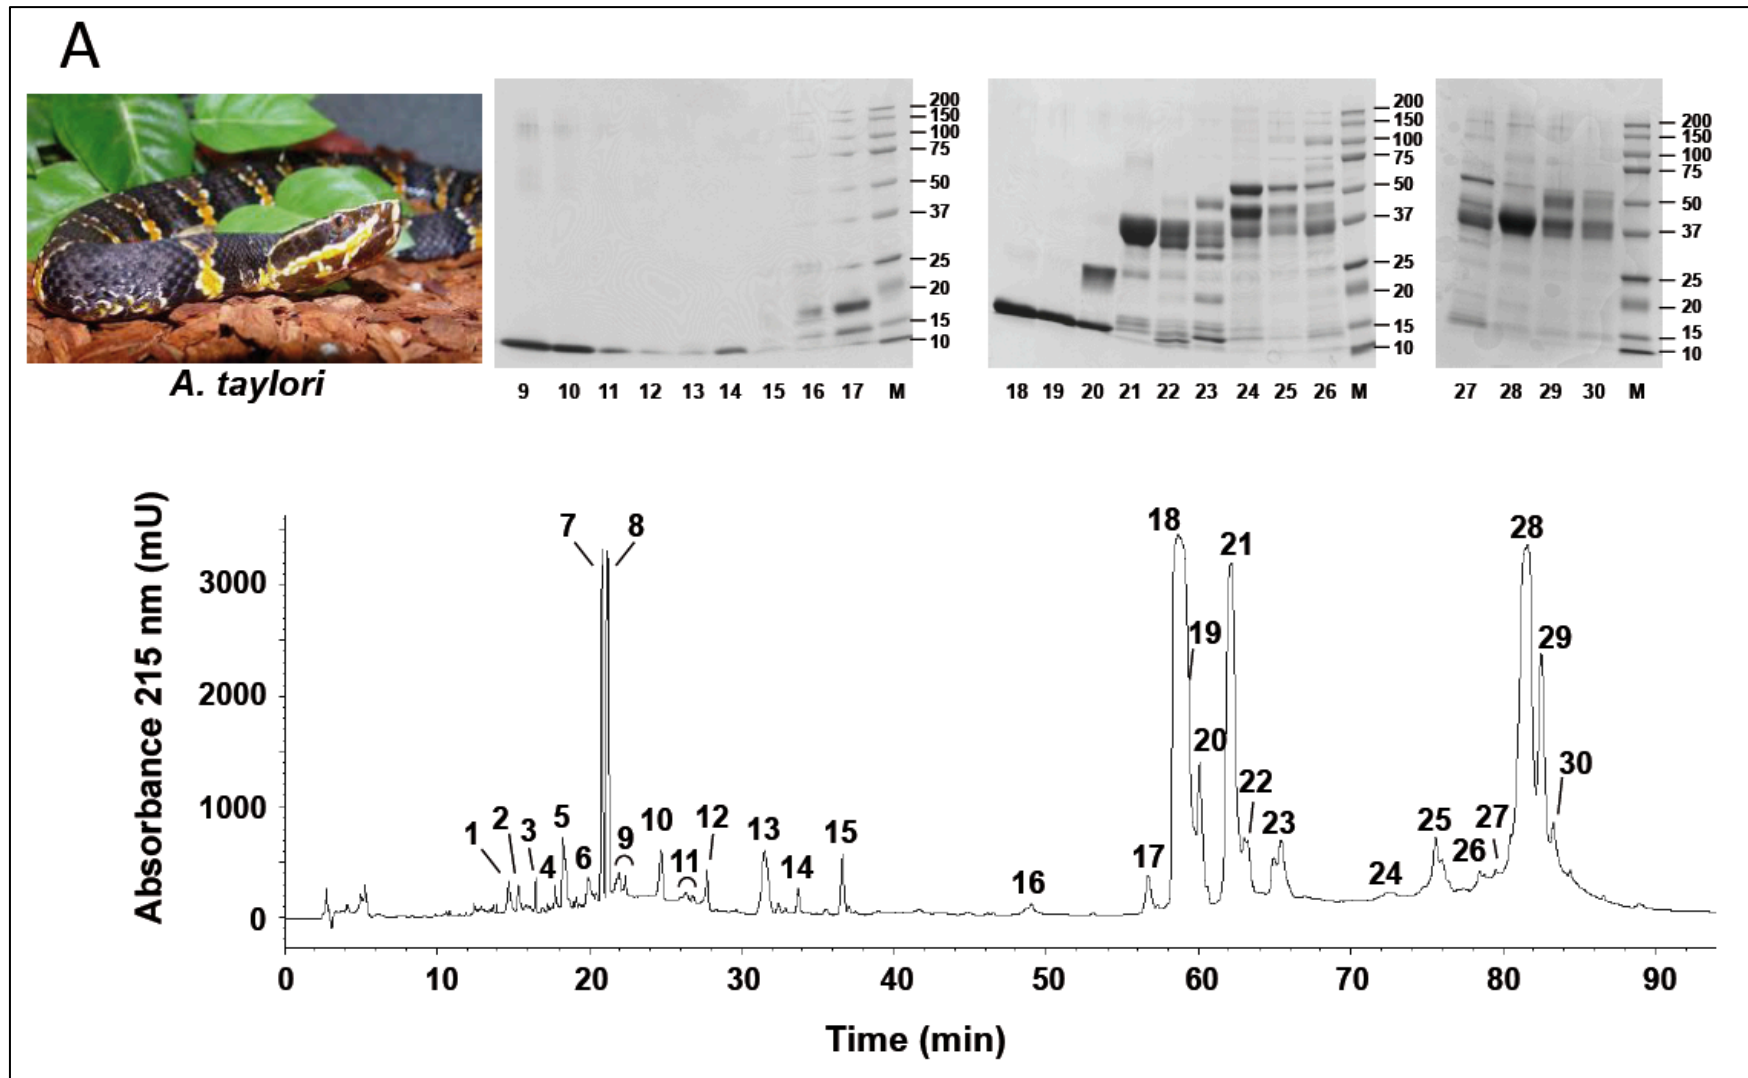

**Table S6:** Assignment of the RP-HPLC isolated fractions of *Agkistrodon taylori* venom to protein families by MALDI-TOF-TOF or nESI-MS-MS of selected peptide ions from in-gel trypsin-digested protein bands from the SDS-PAGE shown in Fig.3A. \* Cysteine residues are carbamidomethylated. X: Leu/Ile; B: Lys/Gln; Z: pyrrolidone carboxylic acid; Mass estimations by SDS-PAGE (reducing conditions) are indicated in kDa. Confidence (Conf) and Score (Sc) values are calculated by the Paragon algorithm of ProteinPilot®.

| Peak | %    | Mass, kDa | Peptide ion |   | MS/MS-derived sequence | Conf (%) | Sc | Protein family; ~ related protein *                |
|------|------|-----------|-------------|---|------------------------|----------|----|----------------------------------------------------|
|      |      |           | m/z         | z |                        |          |    |                                                    |
| 1    | 0.3  | -         | 731.5       | 1 | RPPHPB                 | -        | -  | Bradykinin-potentiating peptide fragment; ~ P85167 |
|      |      |           | 1333.8      | 1 | DHHAGVGGGGGGGGGGGA     |          |    |                                                    |
| 2    | 0.2  | -         | 731.5       | 1 | RPPHPB                 | -        | -  | Bradykinin-potentiating peptide fragment; ~ P85167 |
| 3    | 0.1  | -         | -           | - | unknown                | -        | -  | -                                                  |
| 4    | 0.3  | -         | 1148.7      | 1 | (SE)THYSDPGR           | -        | -  | Metalloproteinase fragment; ~ Q92032               |
| 5    | 0.7  | -         | 1063.7      | 1 | TPPAGPDVGPR            | -        | -  | Bradykinin-potentiating peptide; ~ P85025          |
| 6    | 0.4  | -         | -           | - | unknown                | -        | -  | -                                                  |
| 7    | 3.0  | -         | 430.5       | 1 | ZNW                    | -        | -  | SVMP inhibitor; P01021                             |
|      |      |           | 520.1       | 2 | RPPHPBXPP              | -        | -  | Bradykinin-potentiating peptide; ~ P85167          |
| 8    | 3.0  | -         | 444.2       | 1 | ZBW                    | -        | -  | SVMP inhibitor; P01021                             |
| 9    | 1.2  | 10        | 1983.8      | 1 | XTPGSBCAEGXCCDBCK      | 99       | 7  | Disintegrin; ~ Q805F7                              |
| 10   | 1.1  | 10        | 1983.9      | 1 | XTPGSBCAEGXCCDBCK      | 99       | 13 | Disintegrin; ~ Q805F7                              |
|      |      |           | 1137.5      | 1 | CTGBSGDCPR             | 95.4     | 8  |                                                    |
| 11   | 0.6  | 10        | 1276.8      | 1 | ZBWPPGHHXPP            | -        | -  | Bradykinin-potentiating peptide; ~ POC7J9          |
| 12   | 0.6  | 10        | 1276.8      | 1 | ZBWPPGHHXPP            | -        | -  | Bradykinin-potentiating peptide; ~ POC7J9          |
| 13   | 1.6  | 10        | -           | - | unknown                | -        | -  | -                                                  |
| 14   | 0.4  | 10        | 1196.5      | 1 | NPCCDAATCK             | 99       | 10 | Disintegrin; ~ Q805F7                              |
|      |      |           | 1983.9      | 1 | XTPGSBCAEGXCCDBCK      | 99       | 10 |                                                    |
|      |      |           | 2023.0      | 1 | XRPGABCAEGXCCDBCK      | 99       | 11 |                                                    |
|      |      |           | 1063.5      | 1 | ARGDNPDYR              | 96.6     | 9  |                                                    |
| 15   | 0.7  | 10        | -           | - | unknown                | -        | -  | -                                                  |
| 16   | 0.4  | 16        | 1505.6      | 1 | CCFVHDCCYGK            | 99       | 10 | Phospholipase A <sub>2</sub> , D49: ~ P51972       |
| 17   | 0.8  | 16        | 1505.6      | 1 | CCFVHDCCYGK            | 99       | 10 | Phospholipase A <sub>2</sub> , D49: ~ P51972       |
| 18   | 23.1 | 16        | 1754.9      | 1 | EMCECDBAVAXCXR         | 99       | 15 | Phospholipase A <sub>2</sub> , D49: ~ P51972       |
|      |      |           | 1205.6      | 1 | TDRYSYSWK              | 99       | 12 |                                                    |

|     |     |    |        |   |                        |      |    |                                              |
|-----|-----|----|--------|---|------------------------|------|----|----------------------------------------------|
|     |     |    | 1505.6 | 1 | CCFVHDCCYGK            | 99   | 18 |                                              |
|     |     |    | 2059.0 | 1 | XAXTSYGSYGCNCGWGHR     | 99   | 21 |                                              |
| 19  | 2.2 | 16 | 1505.6 | 1 | CCFVHDCCYGK            | 99   | 16 | Phospholipase A <sub>2</sub> , D49: ~ P51972 |
|     |     |    | 2059.0 | 1 | XAXTSYGSYGCNCGWGHR     | 99   | 17 |                                              |
| 20a | 5.6 | 22 | 1196.5 | 1 | SXVBBYGCBDK            | 99   | 12 | CRISP; ~ Q7ZTA0                              |
|     |     |    | 1983.9 | 1 | SVDFDSESPR             | 99   | 11 |                                              |
|     |     |    | 2023.0 | 1 | MEWYPEAAAANAER         | 99   | 12 |                                              |
|     |     |    | 1063.5 | 1 | XVDXHNSXR              | 99   | 12 |                                              |
| 20b | 7.8 | 15 | 2059.0 | 1 | XAXTSYGSYGCNCGWGHR     | 99   | 7  | Phospholipase A <sub>2</sub> , K49: ~ Q9PSF9 |
|     |     |    | 850.4  | 1 | CCFVHK                 | 98.9 | 8  |                                              |
| 21a | 0.6 | 32 | 1088.7 | 1 | XYXGMHNXK              | 79.1 | 5  | Serine proteinase; ~ P09872                  |
| 21b | 0.1 | 16 | 1088.6 | 1 | XYXGMHNXK              | 99   | 10 | Serine proteinase; ~ P09872                  |
|     |     |    | 1498.7 | 1 | VVGGDECNXNEHR          | 98.7 | 8  |                                              |
| 21c | 0.2 | 15 | 1088.5 | 1 | XYXGMHNXK              | 99   | 8  | Serine proteinase; ~ P09872                  |
|     |     |    | 1498.6 | 1 | VVGGDECNXNEHR          | 88   | 8  |                                              |
| 21d | 0.2 | 14 | -      | - | unknown                | -    | -  | -                                            |
| 22a | 1.1 | 34 | 1088.6 | 1 | XYXGMHNXK              | 99   | 11 | Serine proteinase; ~ P09872                  |
|     |     |    | 1498.7 | 1 | VVGGDECNXNEHR          | 99   | 14 |                                              |
|     |     |    | 2260.3 | 1 | NSAHXAPXSXPSNPPSVGSVCR | 99   | 26 |                                              |
| 22b | 1.2 | 30 | 1088.6 | 1 | XYXGMHNXK              | 99   | 9  | Serine proteinase; ~ P09872                  |
|     |     |    | 1498.7 | 1 | VVGGDECNXNEHR          | 99   | 10 |                                              |
|     |     |    | 2260.3 | 1 | NSAHXAPXSXPSNPPSVGSVCR | 99   | 20 |                                              |
| 22c | 1.0 | 11 | 1519.8 | 1 | NVGVBPVVPDNER          | 99   | 11 | Ohanin-like: ~ Q27J48                        |
| 23a | 0.2 | 43 | 1526.8 | 1 | XXGGDECNXNEHR          | 99   | 14 | Serine proteinase: ~ Q9PSN3                  |
|     |     |    | 2217.2 | 1 | DSGGPXXCNGBFBGXVSWGPK  | 99   | 17 |                                              |
|     |     |    | 1762.0 | 1 | XXCAGVXEGGXDTCBR       | 99   | 14 |                                              |
|     |     |    | 1605.9 | 1 | XXCAGVXEGGXDTCK        | 99   | 18 |                                              |
|     |     |    | 2317.3 | 1 | NSEHXAPXSXPSPPXVGSVCR  | 99   | 24 |                                              |
| 23b | 0.2 | 34 | 1088.6 | 1 | XYXGMHNXK              | 99   | 12 | Serine proteinase; ~ P09872                  |
|     |     |    | 1456.8 | 1 | SXPSNPPSVGSVCR         | 99   | 14 |                                              |
|     |     |    | 2260.2 | 1 | NSAHXAPXSXPSNPPSVGSVCR | 99   | 21 |                                              |
|     |     |    | 1498.7 | 1 | VVGGDECNXNEHR          | 99   | 12 |                                              |
| 23c | 0.3 | 30 | 1498.7 | 1 | VVGGDECNXNEHR          | 99   | 9  | Serine proteinase; ~ Q71QJ1                  |
|     |     |    | 1189.7 | 1 | WDBDXMXXR              | 94.6 | 6  |                                              |
| 23d | 0.2 | 27 | 2433.3 | 1 | XNXXDDAACBPGYPEVXPEYR  | 99   | 7  | Serine proteinase; ~ P82981                  |
| 23e | 0.1 | 18 | -      | - | unknown                | -    | -  | -                                            |

|     |     |    |        |   |                        |      |    |                                     |
|-----|-----|----|--------|---|------------------------|------|----|-------------------------------------|
| 23f | 0.2 | 14 | 1498.7 | 1 | VVGGDECNXNEHR          | 97.8 | 8  | Serine proteinase; ~ Q9YGJ8         |
| 23g | 0.3 | 13 | 1401.7 | 1 | GBAEVWXGXWDK           | 99   | 12 | C-type lectin/lectin-like; ~ Q9PSN0 |
|     |     |    | 1241.5 | 1 | DFSWEWTDK              | 99   | 13 |                                     |
|     |     |    | 1572.8 | 1 | EFCVEXVSXTGYR          | 99   | 13 |                                     |
|     |     |    | 1206.6 | 1 | XWNDBVCGSK             | 94.7 | 5  |                                     |
| 24a | 2.2 | 50 | 2560.1 | 1 | NPXEECFRETDYEEFXEXAR   | 99   | 11 | L-amino acid oxidase; ~ P56742      |
|     |     |    | 2347.1 | 1 | XYFAGEYTABFHGWXDSTXK   | 99   | 17 |                                     |
|     |     |    | 1514.7 | 1 | ETDYEEFXEXAR           | 99   | 17 |                                     |
| 24b | 1.6 | 40 | 985.6  | 1 | EHBAFXXK               | 99   |    | Metalloproteinase; ~ Q9DGB9         |
|     |     |    | 1733.9 | 1 | MYDXVNVXTPXYHR         | 97.1 |    |                                     |
| 24c | 0.9 | 33 | 1498.7 | 1 | VVGGDECNXNEHR          | 99   | 8  | Serine proteinase; ~ P09872         |
|     |     |    | 2260.2 | 1 | NSAHXAPXSXPSNPPSVGSVCR | 99   | 17 |                                     |
|     |     |    | 1088.6 | 1 | XYXGMHNXX              | 98.8 | 6  |                                     |
| 25a | 1.1 | 51 | 1514.8 | 1 | ETDYEEFXEXAR           | 60.7 | 6  | L-amino acid oxidase; ~ Q90W54      |
| 25b | 0.6 | 41 | 985.6  | 1 | EHBAFXXK               | 99   | 10 | Metalloproteinase; ~ Q8AWI5         |
| 26' | 0.2 | 99 | -      | - | unknown                | -    | -  | -                                   |
| 26a | 0.4 | 53 | 1514.7 | 1 | ETDYEEFXEXAR           | 99   | 13 | L-amino acid oxidase; ~ Q90W54      |
| 26b | 0.3 | 41 | 985.6  | 1 | EHBAFXXK               | 99   | 11 | Metalloproteinase; ~ Q9DGB9         |
|     |     |    | 1368.7 | 1 | XYCFPNSPENK            | 99   | 9  |                                     |
|     |     |    | 1734.0 | 1 | MYDXVNVXTPXYHR         | 99   | 11 |                                     |
| 26c | 0.6 | 34 | 1088.6 | 1 | XYXGMHNXX              | 99   | 11 | Serine proteinase; ~ P09872         |
|     |     |    | 2260.2 | 1 | NSAHXAPXSXPSNPPSVGSVCR | 99   | 21 |                                     |
|     |     |    | 1498.7 | 1 | VVGGDECNXNEHR          | 99   | 12 |                                     |
| 26d | 0.3 | 13 | 1206.6 | 1 | XWNDBVCGSK             | 99   | 7  | C-type lectin/lectin-like; ~ Q9PSN0 |
|     |     |    | 1401.7 | 1 | GBAEVWXGXWDK           | 99   | 11 |                                     |
|     |     |    | 1572.8 | 1 | EFCVEXVSXTGYR          | 99   | 12 |                                     |
|     |     |    | 1241.6 | 1 | DFSWEWTDK              | 99   | 11 |                                     |
| 27a | 1.1 | 69 | 1514.8 | 1 | ETDYEEFXEXAR           | 99   | 11 | L-amino acid oxidase; ~ Q90W54      |
|     |     |    | 1064.5 | 1 | NPXEECFR               | 93.8 | 7  |                                     |
| 27b | 0.8 | 51 | 1380.7 | 1 | YXEXFXVVDNR            | 90.2 | 5  | Metalloproteinase; ~ P0C6E3         |
| 27c | 1.8 | 42 | 1088.6 | 1 | XYXGMHNXX              | 99   | 10 | Serine proteinase; ~ P09872         |
|     |     |    | 1498.7 | 1 | VVGGDECNXNEHR          | 99   | 14 |                                     |
|     |     |    | 2260.2 | 1 | NSAHXAPXSXPSNPPSVGSVCR | 99   | 25 |                                     |
| 27d | 0.8 | 15 | 1621.9 | 1 | XFDEXBAWEDAER          | 99   | 13 | C-type lectin/lectin-like; ~ Q9PSN0 |
|     |     |    | 1401.8 | 1 | GBAEVWXGXWDK           | 99   | 14 |                                     |
|     |     |    | 1572.9 | 1 | EFCVEXVSXTGYR          | 99   | 13 |                                     |
|     |     |    | 1206.6 | 1 | XWNDBVCGSK             | 98   | 7  |                                     |

|     |      |    |        |   |                     |      |    |                             |
|-----|------|----|--------|---|---------------------|------|----|-----------------------------|
|     |      |    | 1241.6 | 1 | DFSWEWTDR           | 96.1 | 8  |                             |
| 28  | 21.7 | 42 | 1598.7 | 1 | NCBDPCCNAATCK       | 99   | 10 | Metalloproteinase; ~ P0C6E3 |
|     |      |    | 2252.0 | 1 | BYSWVBCESGECCDBCR   | 99   | 9  |                             |
|     |      |    | 1380.8 | 1 | YXEXFXVVDNR         | 99   | 14 |                             |
|     |      |    | 2123.9 | 1 | YSWVBCESGECCDBCR    | 99   | 10 |                             |
|     |      |    | 1664.8 | 1 | GVXGSAYPAGMCDPNR    | 99   | 13 |                             |
|     |      |    | 1800.0 | 1 | TSHDNABXXTAXVFNR    | 99   | 25 |                             |
| 29a | 1.4  | 52 | 1652.0 | 1 | XYEXVNXXNEXYR       | 99   | 14 | Metalloproteinase; ~ P0C6E3 |
| 29b | 2.1  | 40 | 1652.0 | 1 | XYEXVNXXNEXYR       | 99   | 15 | Metalloproteinase; ~ P0C6E3 |
|     |      |    | 2294.4 | 1 | XYEXVNXXNEXYRXPXYXR | 99   | 13 |                             |
|     |      |    | 1664.8 | 1 | GVXGSAYPAGMCDPNR    | 99   | 14 |                             |
|     |      |    | 2123.9 | 1 | YSWVBCESGECCDBCR    | 99   | 14 |                             |
|     |      |    | 1380.8 | 1 | YXEXFXVVDNR         | 99   | 16 |                             |
|     |      |    | 1800.0 | 1 | TSHDNABXXTAXVFNR    | 99   | 26 |                             |
|     |      |    | 2252.0 | 1 | BYSWVBCESGECCDBCR   | 96.2 | 9  |                             |
| 30a | 0.6  | 52 | 1652.0 | 1 | XYEXVNXXNEXYR       | 99   | 11 | Metalloproteinase; ~ P0C6E3 |
| 30b | 1.5  | 40 | 2123.8 | 1 | YSWVBCESGECCDBCR    | 99   | 8  | Metalloproteinase; ~ P0C6E3 |
|     |      |    | 1380.8 | 1 | YXEXFXVVDNR         | 99   | 11 |                             |
|     |      |    | 1800.0 | 1 | TSHDNABXXTAXVFNR    | 99   | 14 |                             |

---

Figure 3C

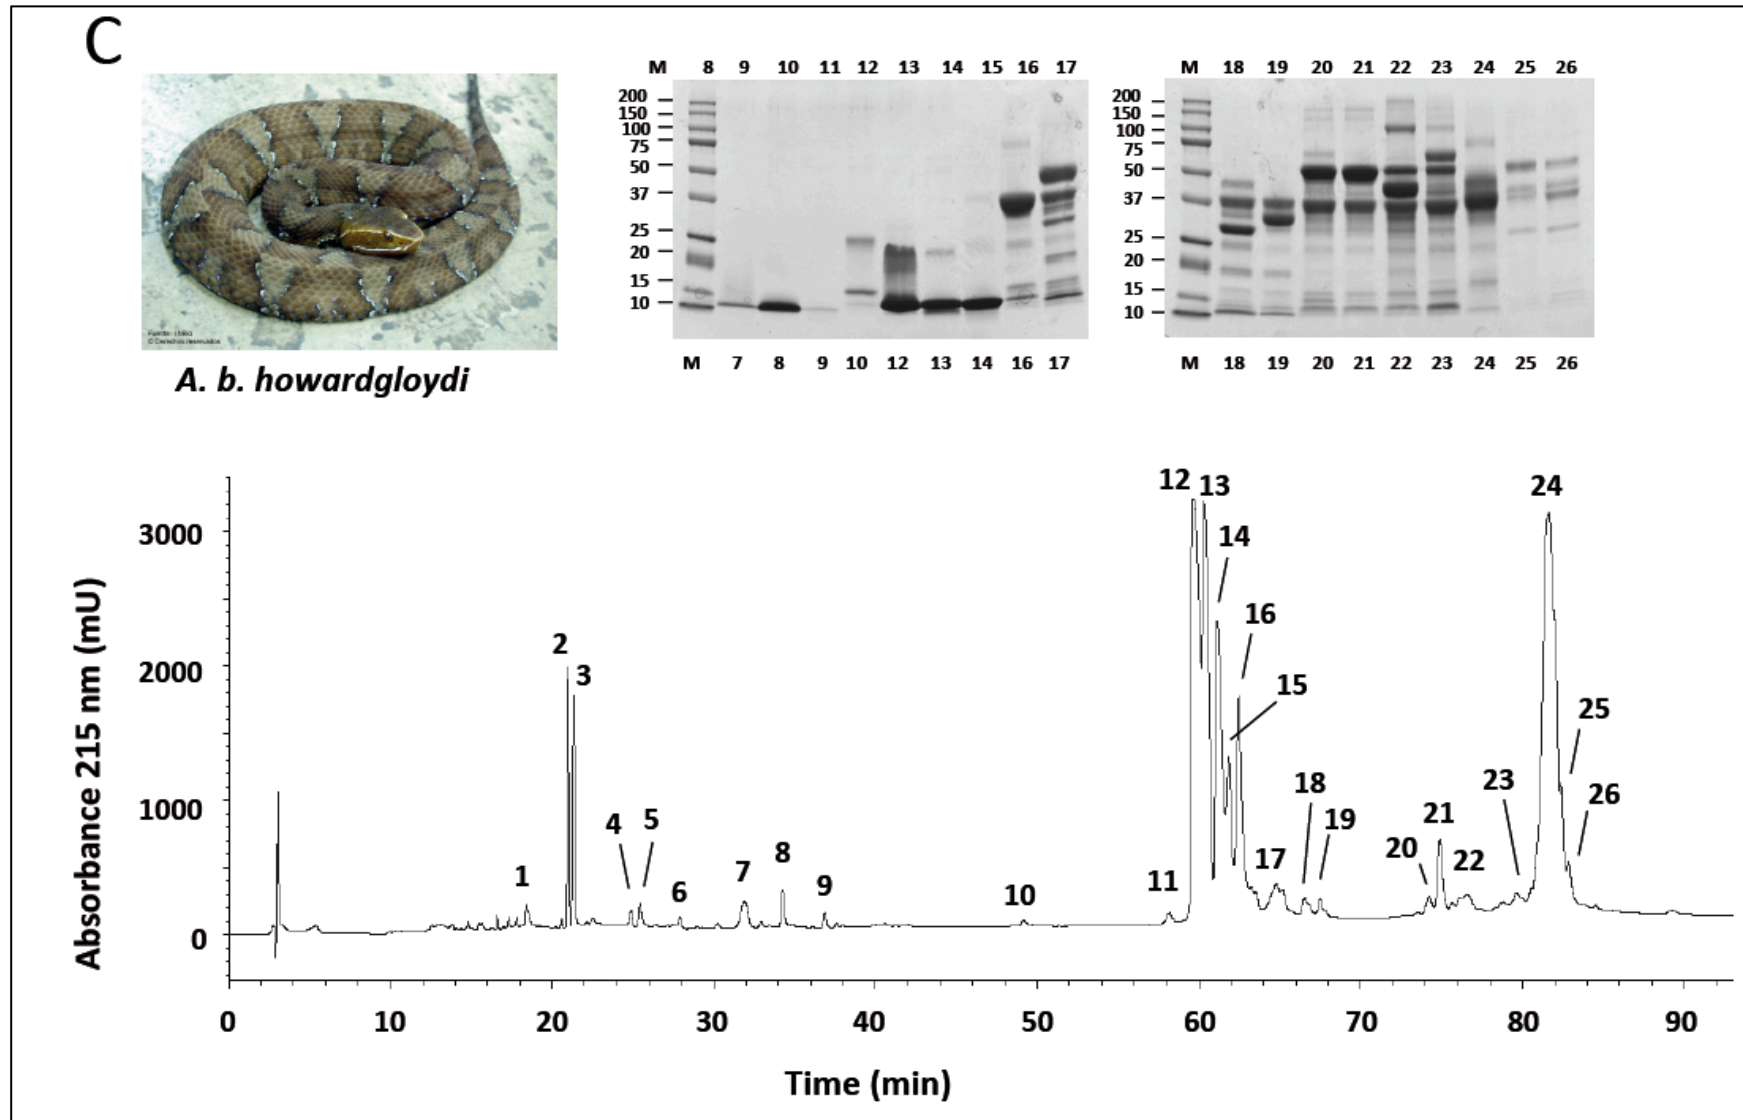



**Table S7:** Assignment of the RP-HPLC isolated fractions of *Agkistrodon bilineatus howardgloydi* venom to protein families by MALDI-TOF-TOF or nESI-MS/MS of selected peptide ions from in-gel trypsin-digested protein bands from the SDS-PAGE shown in Fig.3C. \* Cysteine residues are carbamidomethylated. X: Leu/Ile; B: Lys/Gln; Z, pyroglutamate (2-oxo-pyrrolidone carboxylic acid). <sup>ox</sup>: oxidized; <sup>da</sup>: deamidated; Mass estimations by SDS-PAGE (reducing conditions) are indicated in kDa, or in parentheses when determined by ESI-MS. (■): unreduced bands. Confidence (Conf) and Score (Sc) values are calculated by the Paragon algorithm of ProteinPilot<sup>®</sup>.

| Peak | %    | Mass, kDa<br>(ESI-MS) | Peptide ion |   | MS/MS-derived or N-terminal (N-t) sequence | Conf (%) | Sc | Protein family; ~ related protein *                                                                   |
|------|------|-----------------------|-------------|---|--------------------------------------------|----------|----|-------------------------------------------------------------------------------------------------------|
|      |      |                       | m/z         | z |                                            |          |    |                                                                                                       |
| 1    | 0.4  | -                     | 610.4       | 2 | (253.3)HAGVGGGGGGGGGA                      | -        | -  | PolyHis-Gly peptide; ~ P0DL07<br>Bradykinin-inhibitory peptide<br>Bradykinin-inhibitory peptide       |
|      |      |                       | 539.3       | 1 | TPPAGP                                     |          |    |                                                                                                       |
|      |      |                       | 532.3       | 2 | TPPAGPDVGPR                                |          |    |                                                                                                       |
| 2    | 2.3  | -                     | 430.2       | 1 | ZNW                                        | -        | -  | SVMP inhibitor; P01021                                                                                |
|      |      |                       | 452.1       | 1 | ZNW+Na                                     |          |    |                                                                                                       |
| 3    | 2.2  | -                     | 444.4       | 1 | ZBW                                        | -        | -  | SVMP inhibitor; P01021                                                                                |
| 4    | 0.3  | -                     | 724.4       | 2 | ZBPWDPXPSPP + NAcHexN                      | -        | -  | Bradykinin-potentiating peptide<br>Bradykinin-potentiating peptide                                    |
|      |      |                       | 805.4       | 2 | ZBPWDPXPSPP + NAcHexN-Hex                  |          |    |                                                                                                       |
| 5    | 0.4  | -                     | 622.9       | 2 | ZBPWDPXPSPP                                | -        | -  | Bradykinin-potentiating peptide                                                                       |
| 6    | 0.2  | -                     | 639.0       | 2 | ZBWPPGHHXPP                                | -        | -  | Bradykinin-potentiating peptide                                                                       |
| 7    | 1.2  | 11                    | 1063.4      | 1 | ARGDNPDYR                                  | 95.5     | 8  | Disintegrin; ~ Q805F7                                                                                 |
|      |      |                       | 2022.8      | 1 | XRPGABCAEGXCCDBCK                          | 99.0     | 6  |                                                                                                       |
|      |      |                       | 1608.5      | 1 | DAPANPCCDAETCK                             | 99.0     | 6  |                                                                                                       |
| 8    | 0.7  | 10                    | 2599.1      | 1 | GDWNNDYCTGKSCDCPRNPWN                      | 99.0     | 10 | Disintegrin; ~ Q7SZE0                                                                                 |
|      |      |                       | 2023.0      | 1 | XRPGABCAEGXCCDBCK                          | 97.6     | 7  |                                                                                                       |
| 9    | 0.3  | 9                     | 1063.4      | 1 | ARGDNPDYR                                  | 73.1     | 6  | Disintegrin; ~ Q805F7                                                                                 |
| 10a  | 0.2  | 24                    | 1758.7      | 1 | HWNSYCTTTNTFVK                             | 99.0     | 13 | Nerve growth factor; ~ Q9DEZ9                                                                         |
|      |      |                       | 1363.6      | 1 | AXTMEGNBASWR                               | 98.7     | 7  |                                                                                                       |
|      |      |                       | 962.4       | 1 | BYFFETK                                    | 98.8     | 6  |                                                                                                       |
| 10b  |      | 15                    | 1758.9      | 1 | HWNSYCTTTNTFVK                             | 99.0     | 9  | Nerve growth factor; ~ Q9DEZ9                                                                         |
|      |      |                       | 1696.0      | 1 | FXRXDSACVCVXSR                             | 97.2     | 6  |                                                                                                       |
| 11   | 0.4  | ■ 20                  | 1505.5      | 1 | CCFVHDCCYGK                                | 99.0     | 14 | Phospholipase A <sub>2</sub> , D49; ~ P51972                                                          |
|      |      |                       | 2063.8      | 1 | DATDRCCFVHDCCYGK                           | 99.0     | 11 |                                                                                                       |
| 12a  | 15.1 | 22                    | 2059.1      | 1 | XAXTSYGSYGNCNGWGHR                         | 99.0     | 6  | Phospholipase A <sub>2</sub> , K49; Q9PSF9<br>( <i>Agkistrodon bilineatus</i> : PLA <sub>2</sub> -II) |
| 12b  |      | 12<br>(13996)         | 2059.0      | 1 | XAXTSYGSYGNCNGWGHR                         | 99.0     | 11 | Phospholipase A <sub>2</sub> , K49; Q9PSF9<br>( <i>Agkistrodon bilineatus</i> : PLA <sub>2</sub> -II) |
|      |      |                       | 3700.1      | 1 | SXXEXGBMXXBETGBXAXTSYGSYGNCNGWGHR          | 99.0     | 8  |                                                                                                       |

|     |      |               |        |   |                                            |      |     |                                                                              |
|-----|------|---------------|--------|---|--------------------------------------------|------|-----|------------------------------------------------------------------------------|
|     |      |               | 1205.7 | 1 | TDRYSYSWK                                  | 99.0 | 9   |                                                                              |
|     |      |               | 1408.7 | 1 | DATDRCCFVHK                                | 96.5 | 11  |                                                                              |
| 13  | 14.3 | 12<br>(14065) | 2176.0 | 1 | NAXPFYAFYGCYCGWGGR                         | 95.6 | 7   | Phospholipase A <sub>2</sub> ; ~ P86169                                      |
| 14  | 9.8  | 12<br>(14062) | 1505.7 | 1 | CCFVHDCCYGK                                | 99.0 | 14  | Phospholipase A <sub>2</sub> , D49; ~ P86169                                 |
|     |      |               | 3067.5 | 1 | SGMXWYSAYGCYCGW <sup>ox</sup> GGBGRPBDATDR | 97.2 | 11  |                                                                              |
|     |      |               | 1859.0 | 1 | AAAXCFRDNXDTYNSK                           | 99.0 | 11  |                                                                              |
| 15  | 4.6  | ■ 32          | 2036.0 | 1 | GXAATTXCAGXXEGGBDTCK                       | 99.0 | 11  | Serine proteinase; ~ P09872                                                  |
|     |      |               | 1104.5 | 1 | XYXGM <sup>ox</sup> HNXK                   | 99.0 | 6   |                                                                              |
|     |      |               | 2260.1 | 1 | NSAHXAPXSXPSNPPSVGSVCR                     | 99.0 | 12  |                                                                              |
| 16a | 5.4  | 35            | 2260.3 | 1 | NSAHXAPXSXPSNPPSVGSVCR                     | 99.0 | 10  | Serine proteinase; ~ Q9PTL3                                                  |
| 16b | 0.7  | 16            | 1088.6 | 1 | XYXGMHNXK                                  | 99.0 | 7   | Serine proteinase; ~ P09872                                                  |
|     |      |               | 1498.8 | 1 | VVGGDECXNEHR                               | 95.4 | 9   |                                                                              |
| 16c | 1.2  | 13            | 551.3  | 2 | XDXYTYSVK                                  | man  | man | Phospholipase A <sub>2</sub> , D49; ~ P84397                                 |
| 17a | 2.3  | 48            | 2217.2 | 1 | DSGGPXXCNGBFBGXVSWGPK                      | 99.0 | 7   | Serine proteinase; ~ Q9PSN3<br>( <i>Agkistrodon bilineatus</i> : bilineobin) |
| 17b |      | 38            | 1531.8 | 1 | GXAATTXCAGXXEGGK                           | 99.0 | 11  | Serine proteinase; ~ P09872                                                  |
|     |      |               | 1088.6 | 1 | XYXGMHNXK                                  | 99.0 | 12  |                                                                              |
|     |      |               | 1512.7 | 1 | VXGGDECXNEHR                               | 99.0 | 7   |                                                                              |
|     |      |               | 2260.1 | 1 | NSAHXAPXSXPSNPPSVGSVCR                     | 99.0 | 19  |                                                                              |
|     |      |               | 1230.6 | 1 | EBYFCXNTR                                  | 96.7 | 6   |                                                                              |
| 17c |      | 34            | 2260.1 | 1 | NSAHXAPXSXPSNPPSVGSVCR                     | 99.0 | 8   | Serine proteinase; ~ P09872                                                  |
|     |      |               | 1498.6 | 1 | VVGGDECXNEHR                               | 99.0 | 9   |                                                                              |
| 17d |      | 30            | 1561.7 | 1 | NDEVXDBDXM <sup>ox</sup> XXK               | 99.0 | 14  | Serine proteinase; ~ P82981                                                  |
|     |      |               | 1582.8 | 1 | BVXNEDEBXRNP                               | 99.0 | 11  |                                                                              |
|     |      |               | 1498.6 | 1 | VVGGDECXNEHR                               | 99.0 | 8   |                                                                              |
|     |      |               | 1454.7 | 1 | VXNEDEBXRNP                                | 99.0 | 12  |                                                                              |
| 17e |      | 21            | 1456.7 | 1 | SXPSNPPSVGSVCR                             | 99.0 | 8   | Serine proteinase; ~ Q71QI4                                                  |
|     |      |               | 929.5  | 1 | XBFGXHSK                                   | 93.5 | 6   |                                                                              |
| 17f |      | 17            | 1498.6 | 1 | VVGGDECXNEHR                               | 99.0 | 8   | Serine proteinase; ~ Q9YGJ8                                                  |
| 17g | 0.3  | 14            | 1401.8 | 1 | GBAEVWXGXWDK                               | 99.0 | 13  | C-type lectin/lectin-like; ~ Q9PSN0                                          |
|     |      |               | 1621.9 | 1 | XFDEXBAWEDAER                              | 99.0 | 9   |                                                                              |
|     |      |               | 1241.6 | 1 | DFSWEWTD                                   | 99.0 | 9   |                                                                              |
| 18a | 0.9  | 44            | 2217.0 | 1 | DSGGPXXCNGBFBGXVSWGPK                      | 99.0 | 11  | Serine proteinase; ~ Q9PSN3<br>( <i>Agkistrodon bilineatus</i> : bilineobin) |
|     |      |               | 1761.8 | 1 | XXCAGVXEGGXDTCB                            | 99.0 | 8   |                                                                              |
|     |      |               | 1526.7 | 1 | XXGGDECXNEHR                               | 99.0 | 9   |                                                                              |
|     |      |               | 1655.7 | 1 | CVNXNXFNITVCR                              | 99.0 | 9   |                                                                              |

|     |     |    |        |   |                                                                   |      |    |                                |
|-----|-----|----|--------|---|-------------------------------------------------------------------|------|----|--------------------------------|
|     |     |    | 2317.1 | 1 | NSEHXAPXSXPSSPPXVGSVCR                                            | 99.0 | 12 |                                |
| 18b |     | 36 | 2260.3 | 1 | NSAHXAPXSXPSNPPSVGSVCR                                            | 93.3 | 6  | Serine proteinase; ~ Q9PTL3    |
| 18c |     | 28 | 1512.8 | 1 | VXGGDECNXNEHR                                                     | 99.0 | 8  | Serine proteinase; ~ Q71QJ2    |
|     |     |    | 929.6  | 1 | XBFGXHSK                                                          | 84.8 | 8  |                                |
| 18d |     | 24 | 2260.3 | 1 | NSAHXAPXSXPSNPPSVGSVCR                                            | 84.7 | 6  | Serine proteinase; ~ Q9PTL3    |
| 18e |     | 19 | 929.5  | 1 | XBFGXHSK                                                          | 84.6 | 6  | Serine proteinase; ~ Q71QJ3    |
|     |     |    | 1674.8 | 1 | NYTXWDBDXMXXR                                                     | 77.7 | 7  |                                |
| 18f |     | 11 | 1512.6 | 1 | VXGGDECNXNEHR                                                     | 99.0 | 6  | Serine proteinase; ~ Q9YGJ2    |
|     |     |    | 888.4  | 1 | FFCXSSK                                                           | 85.4 | 7  |                                |
|     |     |    | 1118.5 | 1 | TXCAGXXEGGK                                                       | 81.9 | 6  |                                |
| 19a | 0.7 | 36 | 1498.8 | 1 | VVGGDECNXNEHR                                                     | 99.0 | 9  | Serine proteinase; ~ P09872    |
|     |     |    | 2260.3 | 1 | NSAHXAPXSXPSNPPSVGSVCR                                            | 99.0 | 18 |                                |
|     |     |    | 1104.7 | 1 | XYXGM <sup>ox</sup> HNXK                                          | 96.6 | 7  |                                |
| 19b |     | 30 | 1746.8 | 1 | BBDDEBDBDXMXXR                                                    | 99.0 | 12 | Serine proteinase; ~ Q2QA04    |
|     |     |    | 1118.5 | 1 | TXCAGXXEGGK                                                       | 99.0 | 9  |                                |
|     |     |    | 1498.6 | 1 | VVGGDECNXNEHR                                                     | 99.0 | 9  |                                |
| 19c |     | 10 | 1512.6 | 1 | VXGGDECNXNEHR                                                     | 99.0 | 8  | Serine proteinase; ~ Q71QJ2    |
|     |     |    | 928.5  | 1 | XBFGXHSK                                                          | 93.3 | 9  |                                |
| 20a | 0.3 | 50 | 2347.3 | 1 | XYFAGEYTABFHGWXDSTXK                                              | 99.0 | 8  | L-amino acid oxidase; ~ P56742 |
| 20b | 0.4 | 35 | 1531.7 | 1 | GXAATTXCAGXXEGGK                                                  | 99.0 | 8  | Serine proteinase; ~ P09872    |
|     |     |    | 1230.5 | 1 | EBYFCXNTR                                                         | 99.0 | 7  |                                |
|     |     |    | 1088.5 | 1 | XYXGMHNXK                                                         | 99.0 | 9  |                                |
|     |     |    | 2260.0 | 1 | NSAHXAPXSXPSNPPSVGSVCR                                            | 99.0 | 19 |                                |
|     |     |    | 1512.6 | 1 | VXGGDECNXNEHR                                                     | 94.3 | 7  |                                |
| 20c | 0.1 | 14 | 1507.7 | 1 | VVGGDECNXNEHR                                                     | 99.0 | 8  | Serine proteinase; ~ Q9YGJ8    |
| 20d | 0.1 | 12 | -      | - | unknown                                                           | -    | -  | -                              |
| 21a | 1.5 | 50 | 2347.3 | 1 | XYFAGEYTABFHGWXDSTXK                                              | 99.0 | 13 | L-amino acid oxidase; ~ P56742 |
| 21b | 0.8 | 35 | 1088.6 | 1 | XYXGMHNXK                                                         | 99.0 | 9  | Serine proteinase; ~ P09872    |
|     |     |    | 1498.6 | 1 | VVGGDECNXNEHR                                                     | 99.0 | 9  |                                |
|     |     |    | 2260.1 | 1 | NSAHXAPXSXPSNPPSVGSVCR                                            | 99.0 | 18 |                                |
|     |     |    | 1230.5 | 1 | EBYFCXNTR                                                         | 98.0 | 6  |                                |
| 22a | 0.3 | 99 | -      | - | unknown                                                           | -    | -  | -                              |
| 22b | 0.3 | 51 | 2537.3 | 1 | FDXB <sup>da</sup> BN <sup>da</sup> EFSQ <sup>da</sup> ENENAWYFXK | 93.2 | 7  | L-amino acid oxidase;          |
| 22c | 0.6 | 42 | 1456.9 | 1 | XVXVADYXMF <sup>FXK</sup>                                         | 99.0 | 11 | Metalloproteinase; ~ Q4VM08    |
|     |     |    | 1154.6 | 1 | GNHYGYCR                                                          | 83.4 | 8  |                                |

|     |      |    |        |   |                                                    |      |     |                                                                           |
|-----|------|----|--------|---|----------------------------------------------------|------|-----|---------------------------------------------------------------------------|
| 22d | 0.2  | 34 | 1088.5 | 1 | XYXGMHNXX                                          | 99.0 | 11  | Serine proteinase; ~ P09872                                               |
|     |      |    | 2260.1 | 1 | NSAHXAPXSXPSNPPSVGSVCR                             | 99.0 | 23  |                                                                           |
|     |      |    | 1498.6 | 1 | VVGGDECNXNEHR                                      | 99.0 | 12  |                                                                           |
|     |      |    | 928.5  | 1 | VXNBDAXR                                           | 94.6 | 8   |                                                                           |
| 22e | 0.1  | 12 | -      | - | unknown                                            | -    | -   | -                                                                         |
| 23a | 0.3  | 60 | 2347.3 | 1 | XYFAGEYTABFHGWXDSTXK                               | 99.0 | 8   | L-amino acid oxidase; ~ P56742                                            |
|     |      |    | 2537.4 | 1 | FDXBXN <sup>da</sup> EFSQ <sup>da</sup> ENENAWYFXK | 99.0 | 9   |                                                                           |
| 23b | 0.2  | 51 | 2347.3 | 1 | XYFAGEYTABFHGWXDSTXK                               | 99.0 | 8   | L-amino acid oxidase; ~ P56742                                            |
|     |      |    | 2537.4 | 1 | FDXBXN <sup>da</sup> EFSQ <sup>da</sup> ENENAWYFXK | 99.0 | 9   |                                                                           |
| 23c | 0.4  | 35 | 1088.5 | 1 | XYXGMHNXX                                          | 99.0 | 9   | Serine proteinase; ~ P09872                                               |
|     |      |    | 2260.0 | 1 | NSAHXAPXSXPSNPPSVGSVCR                             | 99.0 | 18  |                                                                           |
|     |      |    | 1498.6 | 1 | VVGGDECNXNEHR                                      | 99.0 | 10  |                                                                           |
| 23d | 0.1  | 13 | 1622.0 | 1 | XFDEXBAWEDAER                                      | 97.5 | 6   | C-type lectin/lectin-like; ~ Q9PSN0                                       |
|     |      |    | 1241.6 | 1 | DFSWEWTDNR                                         | 68.8 | 4   |                                                                           |
| 24a | 9.4  | 44 | 702.8  | 2 | FAXVGXEXWSNR                                       | man  | man | Metalloproteinase; ~ ACV83930                                             |
|     |      |    | 1016.6 | 2 | (1657.1)YNYXEXFXVVDNR                              |      |     |                                                                           |
| 24b | 16.7 | 37 | 2252.1 | 1 | BYSWVBCESGECCDBCR                                  | 99.0 | 8   | Metalloproteinase; P0C6E3<br>( <i>Agkistrodon bilineatus</i> : bilitoxin) |
|     |      |    | 2124.0 | 1 | YSWVBCESGECCDBCR                                   | 99.0 | 9   |                                                                           |
|     |      |    | 2294.5 | 1 | XYEXVNXXNEXYRPXYXR                                 | 99.0 | 11  |                                                                           |
|     |      |    | 2046.3 | 1 | YNPYBYXEXFXVVDNR                                   | 99.0 | 16  |                                                                           |
|     |      |    | 1380.9 | 1 | YXEXFXVVDNR                                        | 99.0 | 14  |                                                                           |
|     |      |    | 1800.1 | 1 | TSHDNABXXTAXVFNR                                   | 99.0 | 4   |                                                                           |
|     |      |    | 1726.8 | 1 | NCBDPCCNAATCBK                                     | 99.0 | 9   |                                                                           |
|     |      |    | 1496.9 | 1 | SASSVTXASFANWR                                     | 99.0 | 11  |                                                                           |
| 25  | 2.8  | 54 | 1223.6 | 1 | HDNABXXTAXK                                        | 99.0 | 7   | Metalloproteinase; ~ P84035                                               |
| 26a | 1.1  | 56 | 2032.1 | 1 | (975.5)XFXVVDNR                                    |      |     | Metalloproteinase; P0C6E3<br>( <i>Agkistrodon bilineatus</i> , bilitoxin) |
| 26b |      | 44 | 2124.0 | 1 | YSWVBCESGECCDBCR                                   | 99.0 | 6   | Metalloproteinase; P0C6E3<br>( <i>Agkistrodon bilineatus</i> , bilitoxin) |
|     |      |    | 2294.5 | 1 | XYEXVNXXNEXYRPXYXR                                 | 99.0 | 9   |                                                                           |
|     |      |    | 2046.3 | 1 | YNPYBYXEXFXVVDNR                                   | 99.0 | 10  |                                                                           |
|     |      |    | 1380.9 | 1 | YXEXFXVVDNR                                        | 99.0 | 11  |                                                                           |
|     |      |    | 1800.1 | 1 | TSHDNABXXTAXVFNR                                   | 99.0 | 9   |                                                                           |
| 26c | 0.4  | 40 | 2260.1 | 1 | NSAHXAPXSXPSNPPSVGSVCR                             | 99.0 | 5   | Serine proteinase; ~ Q9PTL3                                               |
|     |      |    | 1498.6 | 1 | VVGGDECNXNEHR                                      | 98.8 | 4   |                                                                           |
| 26d |      | 28 | 3574.6 | 1 | VSXTDXEVWSDBDXXNVBPAAADTXXEAFGDWR                  | 80.2 | 7   | Metalloproteinase; ~ C9E1S1                                               |

---

Figure 4A

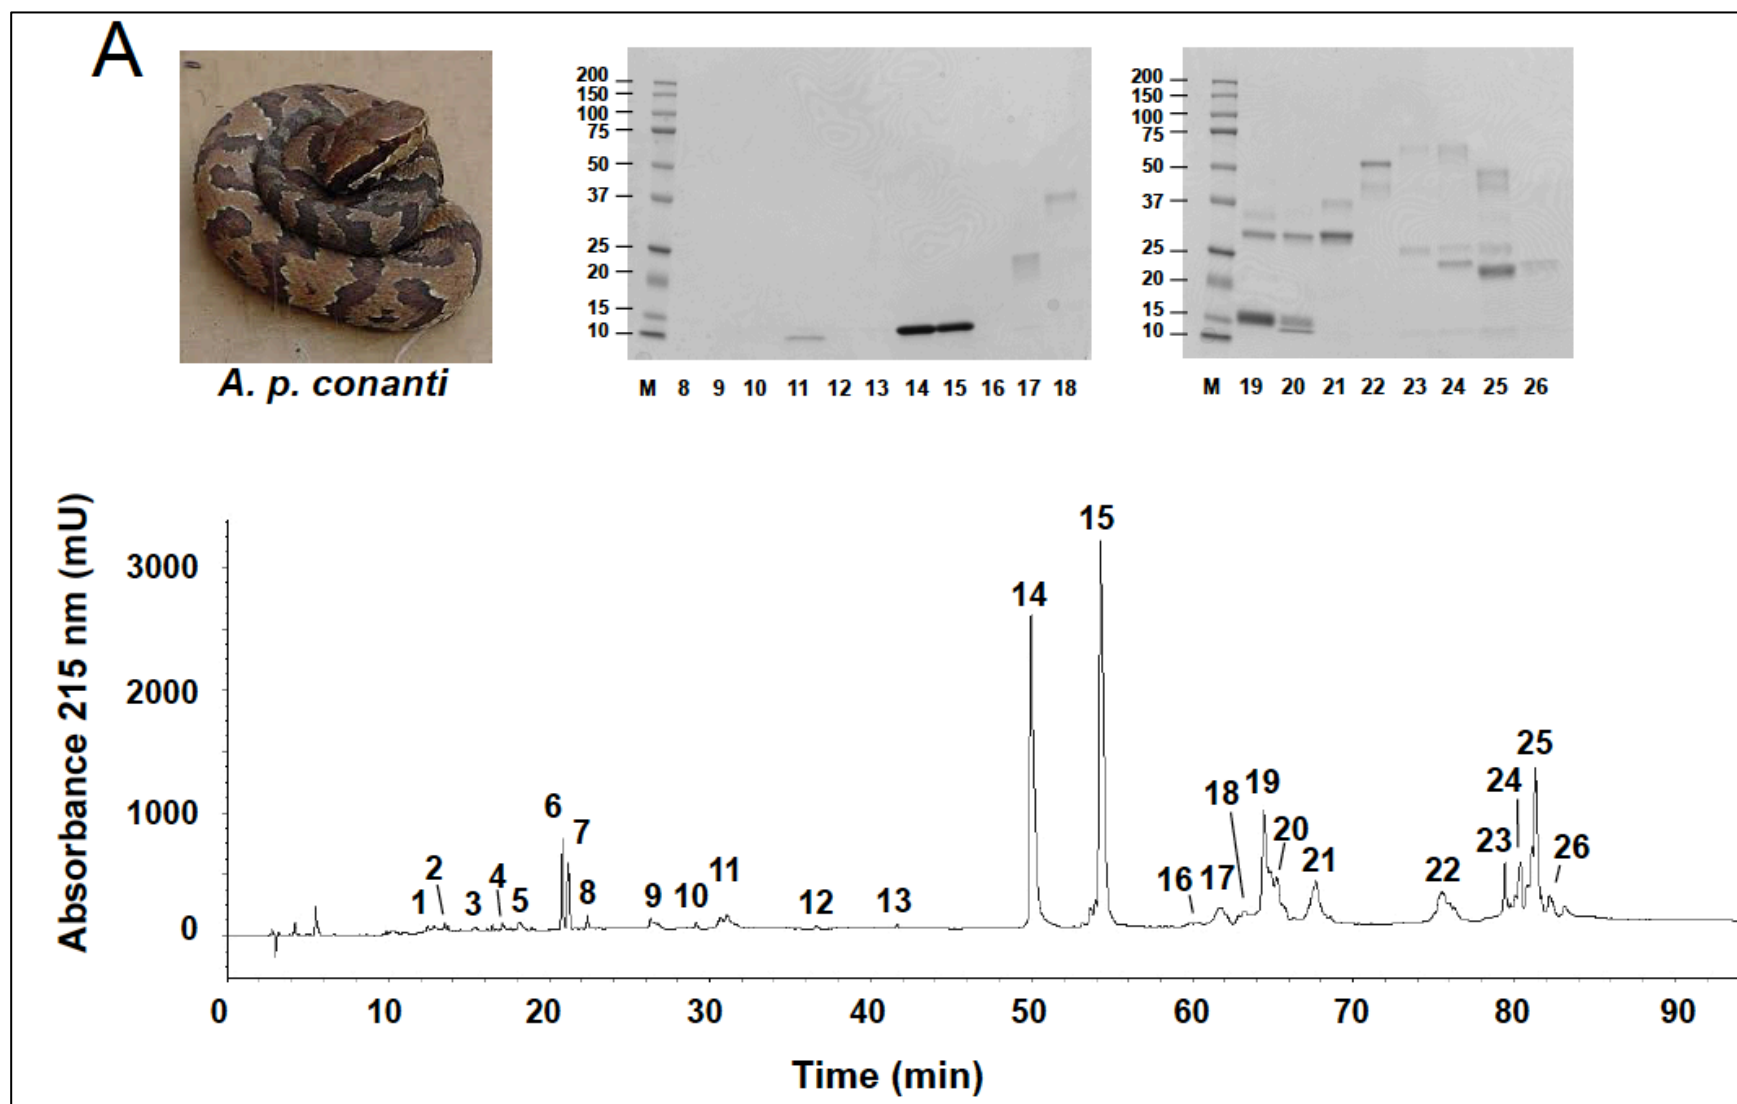

**Table S8:** Assignment of the RP-HPLC isolated fractions of *Agkistrodon piscivorus conanti* venom to protein families by MALDI-TOF-TOF or nESI-MS-MS of selected peptide ions from in-gel trypsin-digested protein bands from the SDS-PAGE shown in Fig.4A. \* Cysteine residues are carbamidomethylated. X: Leu/Ile; B: Lys/Gln; Z, pyroglutamate (2-oxo-pyrrolidone carboxylic acid). <sup>da</sup>: deamidated; <sup>kyn</sup>: kynurenine. Mass estimations by SDS-PAGE (reducing conditions) are indicated in kDa. Confidence (Conf) and Score (Sc) values are calculated by the Paragon algorithm of ProteinPilot®.

| Peak | %    | Mass, kDa | Peptide ion |   | MS/MS-derived or N-terminal (Nt) sequence | Conf (%) | Sc | Protein family; ~ related protein *                                                                                     |
|------|------|-----------|-------------|---|-------------------------------------------|----------|----|-------------------------------------------------------------------------------------------------------------------------|
|      |      |           | m/z         | z |                                           |          |    |                                                                                                                         |
| 1    | 0.2  | -         | 385.3       | 1 | TPPA                                      | -        | -  | Bradykinin-inhibitory peptide; P85025                                                                                   |
| 2    | 0.3  | -         | 449.3       | 1 | ZBW <sup>kyn</sup>                        | -        | -  | SVMP inhibitor; P01021<br>Bradykinin-inhibitory peptide; P85025                                                         |
|      |      |           | 539.2       | 1 | TPPAGP                                    |          |    |                                                                                                                         |
| 3    | 0.2  | -         | -           | - | unknown                                   | -        | -  | -                                                                                                                       |
| 4    | 0.3  | -         | 398.8       | 2 | BVTPVPR                                   | -        | -  | Fragment of PI-SVMP; ACV83930                                                                                           |
| 5    | 0.4  | -         | 865.4       | 1 | PAGPDVGPR                                 | -        | -  | Bradykinin-inhibitory peptide; P85025<br>Bradykinin-inhibitory peptide; P85025<br>Bradykinin-inhibitory peptide; P85025 |
|      |      |           | 481.7       | 2 | PPAGPDVGPR                                |          |    |                                                                                                                         |
|      |      |           | 532.3       | 2 | TPPAGPDVGPR                               |          |    |                                                                                                                         |
| 6    | 2.1  | -         | 452.1       | 1 | ZNW +Na                                   | -        | -  | SVMP inhibitor; P01021<br>SVMP inhibitor; P01021                                                                        |
|      |      |           | 430.1       | 1 | ZNW                                       |          |    |                                                                                                                         |
| 7    | 1.8  | -         | 488.1       | 1 | WBPG                                      | -        | -  | Fragment of C-type lectin; ~ ABP94108                                                                                   |
| 8    | 0.4  | -         | 467.3       | 1 | BGVY                                      | -        | -  | Peptide of SVMP; ~ Q0NZY0                                                                                               |
| 9    | 0.6  | -         | -           | - | unknown                                   | -        | -  | -                                                                                                                       |
| 10   | 0.5  | -         | -           | - | unknown                                   | -        | -  | -                                                                                                                       |
| 11   | 2.2  | 9         | 1967.9      | 1 | XTPGABCAEGXCCDBCK                         | 99.0     | 6  | Disintegrin; ~ Q805F4                                                                                                   |
|      |      |           | 1884.8      | 1 | GDDXDDYCNGXSAGCPR                         | 99.0     | 8  |                                                                                                                         |
| 12   | 0.2  | -         | -           | - | unknown                                   | -        | -  | -                                                                                                                       |
| 13   | 0.2  | -         | -           | - | unknown                                   | -        | -  | -                                                                                                                       |
| 14   | 17.3 | 13        | 919.5       | 1 | MXXBETGK                                  | 99.0     | 10 | Phospholipase A <sub>2</sub> , K49; ~ P49121                                                                            |
|      |      |           | 2060.0      | 1 | NAXTSYGSYGCNCGWGHR                        | 99.0     | 21 |                                                                                                                         |
| 15   | 22.7 | 13        | 2316.1      | 1 | SGMXWYSAYGCYCGWGGBGR                      | 99.0     | 14 | Phospholipase A <sub>2</sub> , D49; ~ P51972                                                                            |
|      |      |           | 1505.6      | 1 | CCFVHDCCYGK                               | 99.0     | 18 |                                                                                                                         |
|      |      |           | 1578.7      | 1 | SAYGCYCGWGGBGR                            | 99.0     | 19 |                                                                                                                         |
|      |      |           | 1257.6      | 1 | GCYCGWGGBGR                               | 98.7     | 9  |                                                                                                                         |
| 16   | 0.7  | -         | -           | - | unknown                                   | -        | -  | -                                                                                                                       |

|     |     |    |        |   |                                        |      |    |                                              |
|-----|-----|----|--------|---|----------------------------------------|------|----|----------------------------------------------|
| 17  | 2.4 | 23 | 2510.1 | 1 | SGPPCGDCPSACVN <sup>da</sup> GXCTNPCTK | 99.0 | 9  | CRISP; ~ Q7ZTA0                              |
|     |     |    | 1138.6 | 1 | SVDFDSESPR                             | 99.0 | 9  |                                              |
|     |     |    | 1325.7 | 1 | SXVBBYGCBDK                            | 99.0 | 11 |                                              |
|     |     |    | 1890.9 | 1 | BMBSECSAXCFCBNK                        | 99.0 | 8  |                                              |
|     |     |    | 1620.9 | 1 | WTEXXHAWHGENK                          | 99.0 | 17 |                                              |
|     |     |    | 1537.8 | 1 | MEWYPEAAANAER                          | 99.0 | 14 |                                              |
|     |     |    | 1904.1 | 1 | BPEXBNBXVDXHNSXR                       | 99.0 | 20 |                                              |
| 18  | 2.3 | 37 | 1512.7 | 1 | VXGGDECNXNEHR                          | 99.0 | 9  | Serine proteinase; ~ P09872                  |
|     |     |    | 2856.5 | 1 | GDSGGPXXCNGBFBGXXSVGGNPCABPR           | 99.0 | 12 |                                              |
|     |     |    | 2260.2 | 1 | NSAHXAPXSXPSNPPSVGSVCR                 | 99.0 | 18 |                                              |
| 19a | 2.9 | 33 | 1512.7 | 1 | VXGGDECNXNEHR                          | 99.0 | 7  | Serine proteinase; ~ P0CG03                  |
|     |     |    | 1294.7 | 1 | XNXXDYEVCR                             | 99.0 | 8  |                                              |
|     |     |    | 1639.8 | 1 | CANXNXXDYEVCR                          | 99.0 | 10 |                                              |
| 19b | 1.4 | 28 | 1498.7 | 1 | VVGGDECNXNEHR                          | 99.0 | 8  | Serine proteinase; ~ Q9YGJ8                  |
|     |     |    | 1307.7 | 1 | NFBMXFGVHVK                            | 99.0 | 12 |                                              |
|     |     |    | 2889.6 | 1 | XDSPVSNSEHXAPXSXPSSPPSVGSVCR           | 99.0 | 17 |                                              |
| 19c | 4.5 | 15 | 1505.6 | 1 | CCFVHDCCYGK                            | 99.0 | 18 | Phospholipase A <sub>2</sub> , D49; ~ P51972 |
|     |     |    | 1578.7 | 1 | SAYGCYCGWGGBGR                         | 99.0 | 14 |                                              |
|     |     |    | 1368.7 | 1 | N <sup>da</sup> XMBFETXXMK             | 99.0 | 15 |                                              |
| 20a | 1.9 | 28 | 1307.7 | 1 | NFBMXFGVHVK                            | 99.0 | 16 | Serine proteinase; ~ Q9YGJ8                  |
|     |     |    | 1190.6 | 1 | XMGWGTXSPTK                            | 99.0 | 11 |                                              |
|     |     |    | 1498.7 | 1 | VVGGDECNXNEHR                          | 99.0 | 10 |                                              |
|     |     |    | 2889.5 | 1 | XDSPVSNSEHXAPXSXPSSPPSVGSVCR           | 99.0 | 14 |                                              |
| 20b | 1.5 | 14 | 1505.5 | 1 | CCFVHDCCYGK                            | 99.0 | 15 | Phospholipase A <sub>2</sub> , D49; ~ P51972 |
|     |     |    | 1578.6 | 1 | SAYGCYCGWGGBGR                         | 98.9 | 8  |                                              |
| 20c | 1.3 | 12 | 1369.7 | 1 | BDFSWEWTDR                             | 99.0 | 11 | C-type lectin/lectin-like; ~ Q9PSN0          |
|     |     |    | 1401.7 | 1 | GBAEVWXGXWDK                           | 99.0 | 18 |                                              |
|     |     |    | 1572.8 | 1 | EFCVEXVSXTGYR                          | 99.0 | 17 |                                              |
|     |     |    | 1241.5 | 1 | DFSWEWTDR                              | 99.0 | 13 |                                              |
|     |     |    | 1206.6 | 1 | XWNDBVCGSK                             | 96.4 | 9  |                                              |
| 21a | 0.8 | 36 | -      | - | unknown                                | -    | -  |                                              |
| 21b | 5.4 | 28 | 1429.7 | 1 | SXPSSPPSVGSVCR                         | 99.0 | 12 | Serine proteinase; ~ Q91053                  |
|     |     |    | 1639.8 | 1 | CANXNXXDYEVCR                          | 99.0 | 16 |                                              |
|     |     |    | 1294.7 | 1 | XNXXDYEVCR                             | 99.0 | 13 |                                              |
|     |     |    | 1512.7 | 1 | VXGGDECNXNEHR                          | 98.0 | 8  |                                              |
| 22a | 4.5 | 51 | 1594.8 | 1 | DBEDWYANXGPMR                          | 99.0 | 11 | L-amino acid oxidase; ~ Q6STF1               |
|     |     |    | 1064.5 | 1 | NPXEECFR                               | 99.0 | 9  |                                              |
|     |     |    | 1514.7 | 1 | ETDYEEFXEXAR                           | 99.0 | 18 |                                              |

|     |     |    |        |   |                          |      |    |                             |
|-----|-----|----|--------|---|--------------------------|------|----|-----------------------------|
|     |     |    | 1252.7 | 1 | SAGBXYEESXR              | 98.6 | 9  |                             |
| 22b | 1.1 | 41 | 1734.0 | 1 | MYDXVNVXTPXYHR           | 99.0 | 10 | Metalloproteinase; ~ Q9DGB9 |
|     |     |    | 1475.8 | 1 | WEXXBBVDTSTR             | 99.0 | 7  |                             |
|     |     |    | 1368.7 | 1 | XYCFPNSPENK              | 99.0 | 8  |                             |
|     |     |    | 1803.8 | 1 | YFVEVGEECDCGSPR          | 99.0 | 12 |                             |
|     |     |    | 1994.0 | 1 | THNXEPYFESFXNNXR         | 96.1 | 6  |                             |
| 23a | 0.5 | 59 | 1983.9 | 1 | XTPGSBCADGVCCDBCR        | 81.6 | 6  | Metalloproteinase; ~ O42138 |
| 23b | 1.9 | 25 | 1097.6 | 1 | DXXDVBPAAR               | 99.0 | 8  | Metalloproteinase; ~ Q92032 |
|     |     |    | 1247.6 | 1 | HTXDSFGWEWR              | 99.0 | 14 |                             |
| 24a | 1.3 | 58 | 1983.8 | 1 | XTPGSBCADGVCCDBCR        | 96.7 | 7  | Metalloproteinase; ~ O42138 |
| 24b | 0.6 | 25 | 1313.8 | 1 | YVEXVXVADHR              | 99.0 | 10 | Metalloproteinase; ~ Q92043 |
| 24c | 1.9 | 22 | 1065.6 | 1 | YNGN <sup>da</sup> XNTXR | 99.0 | 8  | Metalloproteinase; ~ Q9IAB0 |
|     |     |    | 1921.0 | 1 | XWVHEXVNTMNVFYR          | 99.0 | 11 |                             |
|     |     |    | 1351.7 | 1 | AADTXEAFGDWR             | 99.0 | 11 |                             |
|     |     |    | 1313.8 | 1 | YXEXVVVADHR              | 99.0 | 11 |                             |
|     |     |    | 2564.4 | 1 | XSHDNABXXTAXEXDGETXGXANR | 99.0 | 25 |                             |
| 25a | 2.5 | 45 | 2658.1 | 1 | SECDXAESCTGBSADCPTDDFHR  | 99.0 | 8  | Metalloproteinase; ~ Q92043 |
|     |     |    | 2225.9 | 1 | XHSWVECESGECCEBCR        | 99.0 | 8  |                             |
| 25b | 1.2 | 25 | 1187.6 | 1 | TPEBBGFPBR               | 99.0 | 9  | Metalloproteinase; ~ Q92031 |
|     |     |    | 1313.8 | 1 | YVEXVXVADHR              | 99.0 | 12 |                             |
| 25c | 7.4 | 21 | 2506.5 | 1 | BWVHBXVNTXNEXYRPNXR      | 99.0 | 8  | Metalloproteinase; ~ Q92031 |
|     |     |    | 1223.6 | 1 | NTXNSFGWEWR              | 99.0 | 9  |                             |
|     |     |    | 1913.1 | 1 | BWVHBXVNTXNEXYR          | 99.0 | 13 |                             |
|     |     |    | 1187.6 | 1 | TPEBBGFPBR               | 99.0 | 12 |                             |
|     |     |    | 1313.8 | 1 | YVEXVXVADHR              | 99.0 | 13 |                             |
| 26  | 2.6 | 22 | 1290.8 | 1 | TAXVFDEGXXGR             | 99.0 | 9  | Metalloproteinase; ~ B7U492 |
|     |     |    | 2169.2 | 1 | SHDNABXXTAXVFDEGXXGR     | 99.0 | 10 |                             |
|     |     |    | 1327.8 | 1 | YVEXVXXADHR              | 99.0 | 8  |                             |

---



Figure 4B

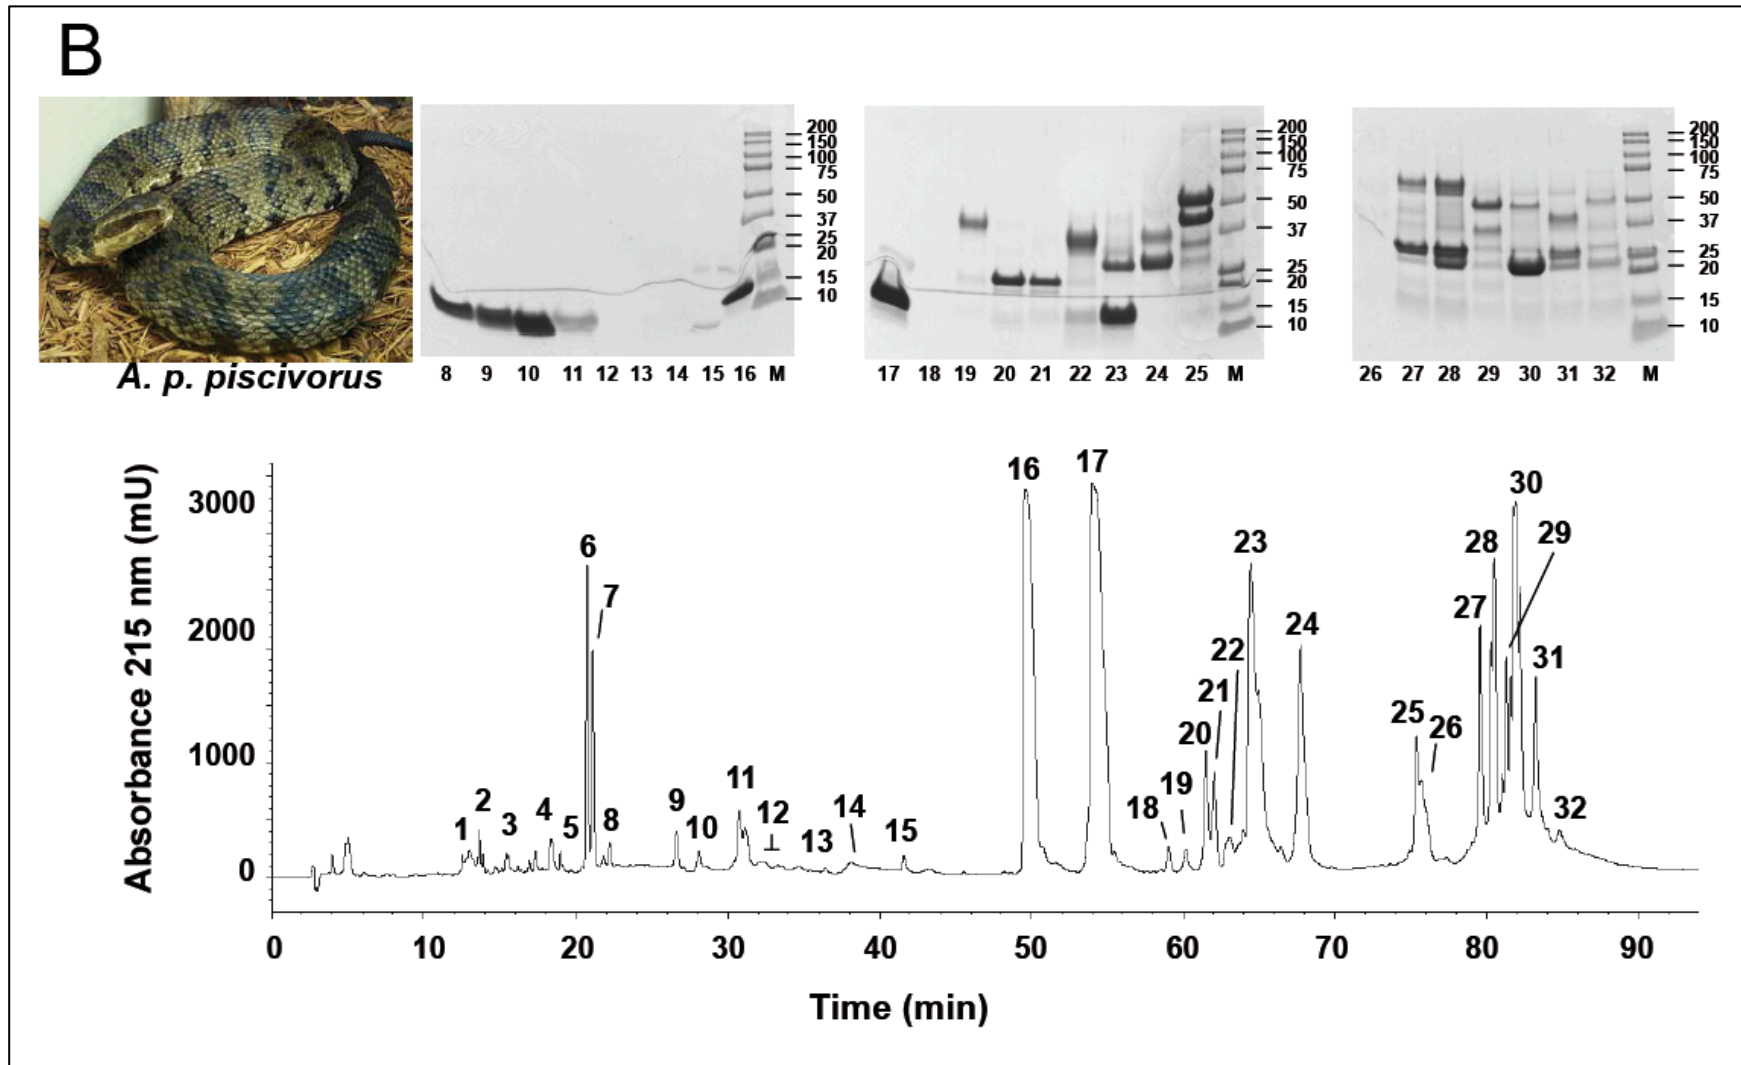

**Table S9:** Assignment of the RP-HPLC isolated fractions of *Agkistrodon piscivorus piscivorus* venom to protein families by MALDI-TOF-TOF or nESI-MS-MS of selected peptide ions from in-gel trypsin-digested protein bands from the SDS-PAGE shown in Fig.4B. \* Cysteine residues are carbamidomethylated. X: Leu/Ile; B: Lys/Gln; Z, pyroglutamate (2-oxo-pyrrolidone carboxylic acid). <sup>da</sup>: deamidated; <sup>py</sup>: pyroglutamic; Mass estimations by SDS-PAGE (reducing conditions) are indicated in kDa, or in parentheses when determined by ESI-MS. Confidence (Conf) and Score (Sc) values are calculated by the Paragon algorithm of ProteinPilot<sup>®</sup>.

| Peak | %   | Mass,<br>kDa<br>(ESI-MS) | Peptide ion |   | MS/MS-derived amino acid sequence | Conf<br>(%) | Sc | Protein family; ~ related protein *     |
|------|-----|--------------------------|-------------|---|-----------------------------------|-------------|----|-----------------------------------------|
|      |     |                          | m/z         | z |                                   |             |    |                                         |
| 1    | 0.5 | -                        | -           | - | unknown                           | -           | -  | -                                       |
| 2    | 0.3 | -                        | 539.2       | 1 | TPPAGP                            | -           | -  | Bradykinin-inhibitory peptide; P85025   |
| 3    | 0.3 | -                        | 398.9       | 2 | BVTPVPR                           | -           | -  | Fragment of PI-SVMP; ACV8393            |
| 4    | 0.5 | -                        | 532.3       | 2 | TPPAGPDVGPR                       | -           | -  | Bradykinin-inhibitory peptide; P85025   |
| 5    | 0.2 | -                        | 865.4       | 1 | PAGPDVGPR                         | -           | -  | Bradykinin-inhibitory peptide; P85025   |
| 6    | 2.5 | -                        | 430.1       | 1 | ZNW                               | -           | -  | SVMP inhibitor; P01021                  |
| 7    | 2.0 | -                        | 444.1       | 1 | ZBW                               | -           | -  | SVMP inhibitor; P01021                  |
|      |     |                          | 469.4       | 2 | XXTXPSTPP                         |             |    |                                         |
| 8    | 0.5 | 9                        | 1869.9      | 1 | GDDVNDYCNGXSAGCPR                 | 99.0        | 10 | Disintegrin; P16338                     |
|      |     |                          | 2097.0      | 1 | ARGDDVNDYCNGXSAGCPR               | 99.0        | 9  |                                         |
|      |     |                          | 2023.0      | 1 | XRPGABCAEGXCCDBCK                 | 99.0        | 14 |                                         |
|      |     |                          | 2517.0      | 1 | EAGEECDGSPENPCCDAATCK             | 93.1        | 6  |                                         |
| 9    | 0.7 | (7739.2)                 | 519.5       | 2 | RPPHPBXPP                         | -           | -  | Bradykinin-inhibitory peptide; ~ P85167 |
|      |     |                          | 2097.0      | 1 | ARGDDVNDYCNGXSAGCPR               | 99.0        | 10 | Disintegrin; P16338                     |
|      |     |                          | 1869.9      | 1 | GDDVNDYCNGXSAGCPR                 | 99.0        | 8  |                                         |
|      |     |                          | 2023.0      | 1 | XRPGABCAEGXCCDBCK                 | 99.0        | 8  |                                         |
|      |     |                          | 1983.9      | 1 | XTPGSBCAEGXCCDBCK                 | 99.0        | 7  | Disintegrin; Q805F5 [40-111]            |
| 10   | 0.5 | (7667.8)                 | 1984.0      | 1 | XTPGSBCAEGXCCDBCK                 | 99.0        | 8  | Disintegrin; Q805F5 [40-110]            |
|      |     |                          | 2112.0      | 1 | ARGDDXDDYCNGXSAGCPR               | 99.0        | 17 |                                         |
|      |     |                          | 2041.0      | 1 | ZCDCGSPGNPCCDAATCK                | 87.0        | 8  |                                         |
| 11   | 1.9 | 9                        | 2022.9      | 1 | XRPGABCAEGXCCDBCK                 | 99.0        | 8  | Disintegrin; ~ P16338                   |
|      |     |                          | 534.9       | 2 | ZNXPHPWPP                         |             |    | Bradykinin-inhibitory peptide           |
| 12   | 1.1 | -                        | -           | - | unknown                           | -           | -  | -                                       |
| 13   | 0.2 | -                        | -           | - | unknown                           | -           | -  | -                                       |
| 14   | 0.8 | -                        | -           | - | unknown                           | -           | -  | -                                       |

|     |          |         |        |   |                                  |      |    |                                              |
|-----|----------|---------|--------|---|----------------------------------|------|----|----------------------------------------------|
| 15  | 0.2      | 8       | -      | - | unknown                          | -    | -  | -                                            |
| 16  | 12.<br>8 | (13949) | 2060.0 | 1 | NAXTSYGSYGCNCGWGHR               | 99.0 | 12 | Phospholipase A <sub>2</sub> , K49; P04361   |
|     |          |         | 919.2  | 1 | MXXBETGK                         | 99.0 | 9  |                                              |
|     |          |         | 1474.4 | 1 | AXXCEEENPCXK                     | 99.0 | 16 |                                              |
|     |          |         | 1751.7 | 1 | BECECDBAVAXCXR                   | 99.0 | 10 |                                              |
|     |          |         | 1204.5 | 1 | TDRYSYSWK                        | 99.0 | 13 |                                              |
| 17  | 17.<br>2 | (13987) | 2316.2 | 1 | SGMXWYSAYGCYCGWGGBGR             | 99.0 | 17 | Phospholipase A <sub>2</sub> , D49; P51972   |
|     |          |         | 1505.7 | 1 | CCFVHDCCYGK                      | 99.0 | 12 |                                              |
|     |          |         | 1278.5 | 1 | AAAXCFRDNXK                      | 99.0 | 12 |                                              |
|     |          |         | 925.3  | 1 | NXFBFEK                          | 99.0 | 11 |                                              |
|     |          |         | 2540.8 | 1 | SGMXWYSAYGCYCGWGGBGRPK           | 99.0 | 19 |                                              |
| 18  | 0.4      | -       | -      | - | unknown                          | -    | -  |                                              |
| 19  | 0.5      | 39      | 1343.6 | 1 | EWVVTAAHCDR                      | 99.0 | 10 | Serine proteinase; ~ P85109                  |
|     |          |         | 1189.6 | 1 | WBDXMXXR                         | 99.0 | 10 |                                              |
|     |          |         | 2146.1 | 1 | SAHXAPXSXPSNPPSVGSVCR            | 99.0 | 15 |                                              |
| 20  | 1.9      | 21      | 1553.9 | 1 | MEWYPEAAANAER                    | 99.0 | 9  | CRISP; ~ Q7ZTA0                              |
|     |          |         | 1904.3 | 1 | BPEXBNBXVDXHNSXR                 | 99.0 | 11 |                                              |
|     |          |         | 1138.6 | 1 | SVDFDSESPR                       | 93.0 | 5  |                                              |
| 21  | 1.6      | 21      | 1553.8 | 1 | MEWYPEAAANAER                    | 99.0 | 9  | CRISP; ~ Q7ZTA0                              |
| 22a | 1.2      | 33      | 3360.5 | 1 | DTCBGDSGGPXXCNGBFBGXXSVGGNPCABPR | 99.0 | 11 | Serine proteinase; ~ P09872                  |
|     |          |         | 2260.1 | 1 | NSAHXAPXSXPSNPPSVGSVCR           | 99.0 | 10 |                                              |
|     |          |         | 2856.3 | 1 | GDSGGPXXCNGBFBGXXSVGGNPCABPR     | 99.0 | 19 |                                              |
|     |          |         | 2449.1 | 1 | MTHPPBTPXXDBVXYPADXRK            | 95.8 | 10 |                                              |
| 22b | 0.4      | 13      | 1505.5 | 1 | CCFVHDCCYGK                      | 99.0 | 12 | Phospholipase A <sub>2</sub> , D49; ~ Q6H3D0 |
| 23a | 5.1      | 25      | 2889.7 | 1 | XDSPVSNSEHXAPXSXPSSPPSVGSVCR     | 99.0 | 12 | Serine proteinase; ~ Q91053                  |
|     |          |         | 1190.7 | 1 | XMGWGTXSPTK                      | 87.0 | 5  |                                              |
| 23b | 6.4      | 13      | 1505.5 | 1 | CCFVHDCCYGK                      | 99.0 | 13 | Phospholipase A <sub>2</sub> , D49; ~ Q9PVF2 |
|     |          |         | 1367.8 | 1 | DXMBFETXXMK                      | 99.0 | 18 |                                              |
| 24a | 2.2      | 34      | 1241.5 | 1 | DFSWEWTDR                        | 70.9 | 5  | C-type lectin/lectin-like; ~ AER27037        |
|     |          |         | 1650.0 | 1 | VFBBXBTWEDAER                    | 99.0 | 10 |                                              |
|     |          |         | 2608.2 | 1 | ETYPDVPHCANXNXXDYEVCR            | 99.0 | 15 |                                              |
| 24b | 4.2      | 27      | 2470.2 | 1 | VFDHXDWXBSXXAGNTDATCPP           | 99.0 | 13 | Serine proteinase; ~ P0DJG5                  |
|     |          |         | 2574.3 | 1 | GNFCGXTXXNBEWVXTAAHCDR           | 99.0 | 8  |                                              |
| 24b | 4.2      | 27      | 1512.7 | 1 | VXGGDECXNEHR                     | 99.0 | 16 | Serine proteinase; ~ Q91053                  |
| 25a | 0.8      | 51      | 1610.9 | 1 | NEEAGWYANXGPMR                   | 99.0 | 11 | L-amino acid oxidase; ~ Q6STF1               |
|     |          |         | 1064.6 | 1 | NPXEFCFR                         | 72.3 | 6  |                                              |

|     |     |    |        |   |                                       |      |    |                               |
|-----|-----|----|--------|---|---------------------------------------|------|----|-------------------------------|
| 25b | 0.7 | 41 | 1809.8 | 1 | YFVEVGEECDGSPR                        | 99.0 | 10 | Metalloproteinase; ~ Q9DGB9   |
|     |     |    | 1712.8 | 1 | AABDECDMADXCTGR                       | 79.7 | 6  |                               |
| 25c | 0.4 | 32 | 679.5  | 2 | YEGDBTEXCSR                           | -    | -  | Metalloproteinase; ~ AEJ31986 |
| 26  | 2.5 | 37 | 2015.8 | 1 | XTTGSBCAEGXCCDBCR                     | 83.5 | 6  | Metalloproteinase; ~ AAZ73489 |
| 27a | 1.4 | 62 | 1983.8 | 1 | XTPGSBCADGVCCDBCR                     | 99.0 | 8  | Metalloproteinase; ~ O42138   |
| 27b | 2.1 | 26 | 1247.6 | 1 | HTXDSFGEW                             | 99.0 | 7  | Metalloproteinase; ~ Q92032   |
| 28a | 1.7 | 61 | 1714.9 | 1 | Q <sup>py</sup> XNXTPEBBAYXDAK        | 99.0 | 10 | Metalloproteinase; ~ O42138   |
|     |     |    | 1983.8 | 1 | XTPGSBCADGVCCDBCR                     | 99.0 | 8  |                               |
|     |     |    | 2316.9 | 1 | DDCDMADXCTGBSAECTDR                   | 80.1 | 5  |                               |
| 28b | 2.1 | 26 | 1751.9 | 1 | VAVTMAHEXGHNXGMR                      | 99.0 | 9  | Metalloproteinase; ~ Q92032   |
|     |     |    | 1313.8 | 1 | SHDNABXXTAXK                          | 99.0 | 7  |                               |
|     |     |    | 1187.6 | 1 | TPEBBGFPBR                            | 99.0 | 9  |                               |
|     |     |    | 1736.0 | 1 | VAVTMAHEXGHNXGMR                      | 79.0 | 6  |                               |
| 28c | 2.1 | 16 | 2564.5 | 1 | XSHDNABXXTAXEXDGETXGXANR              | 99.0 | 8  | Metalloproteinase; ~ Q9IAB0   |
|     |     |    | 2020.2 | 1 | YXNXYDPBCXXNEPXR                      | 76.9 | 7  |                               |
|     |     |    | 2514.5 | 1 | XWVHEXVNTMNVFYRPNXR                   | 66.3 | 6  |                               |
|     |     |    | 1313.8 | 1 | YXEXVVVADHR                           | 51.8 | 5  |                               |
| 29a | 2.1 | 46 | 2658.0 | 1 | SECDXAESCTGBSADCPTDDFHR               | 99.0 | 6  | Metalloproteinase; ~ Q92043   |
|     |     |    | 2225.9 | 1 | XHSWVECESGECCEBCR                     | 99.0 | 7  |                               |
|     |     |    | 1785.0 | 1 | XVNTXNEXYXPXNR                        | 99.0 | 19 |                               |
|     |     |    | 3234.4 | 1 | TDXVSPVCGNEXXEVGEECDGSPANCR           | 99.0 | 12 |                               |
|     |     |    | 2020.0 | 1 | YXNXYDPBCXXNEPXR                      | 99.0 | 13 |                               |
| 29b | 1.2 | 33 | 1327.7 | 1 | YXEXVXVADHR                           | 99.0 | 10 | Metalloproteinase; ~ Q8AWX7   |
| 30a | 3.2 | 46 | 2531.0 | 1 | XRPGTBCEDGECCCEBCQ <sup>da</sup> FBGA | 92.7 | 8  | Metalloproteinase; ~ P86092   |
| 30b | 7.5 | 15 | 1327.8 | 1 | YVEXVXXADHR                           | 99.0 | 9  | Metalloproteinase; ~ B7U492   |
|     |     |    | 2168.6 | 1 | SHDNABXXTAXVFDEGXXGR                  | 99.0 | 27 |                               |
| 31a | 1.3 | 40 | 1652.0 | 1 | XYEXVNXXNEXYR                         | 94.7 | 6  | Metalloproteinase; ~ P0C6E3   |
| 31b | 1.7 | 23 | 1313.8 | 1 | YVEXVXVADHR                           | 76.9 | 5  | Metalloproteinase; ~ Q92043   |
| 31c | 1.3 | 16 | 1327.9 | 1 | YVEXVXXADHR                           | 99.0 | 9  | Metalloproteinase; ~ B7U492   |
| 32a | 0.8 | 50 | 2688.4 | 1 | SECDXAESCTGBSADCPMDDFHR               | 98.9 | 6  | Metalloproteinase; ~ Q9PSN7   |
| 32b | 1.0 | 18 | 1327.9 | 1 | YVEXVXXADHR                           | 98.0 | 7  | Metalloproteinase; ~ B7U492   |

---

Figure 4C

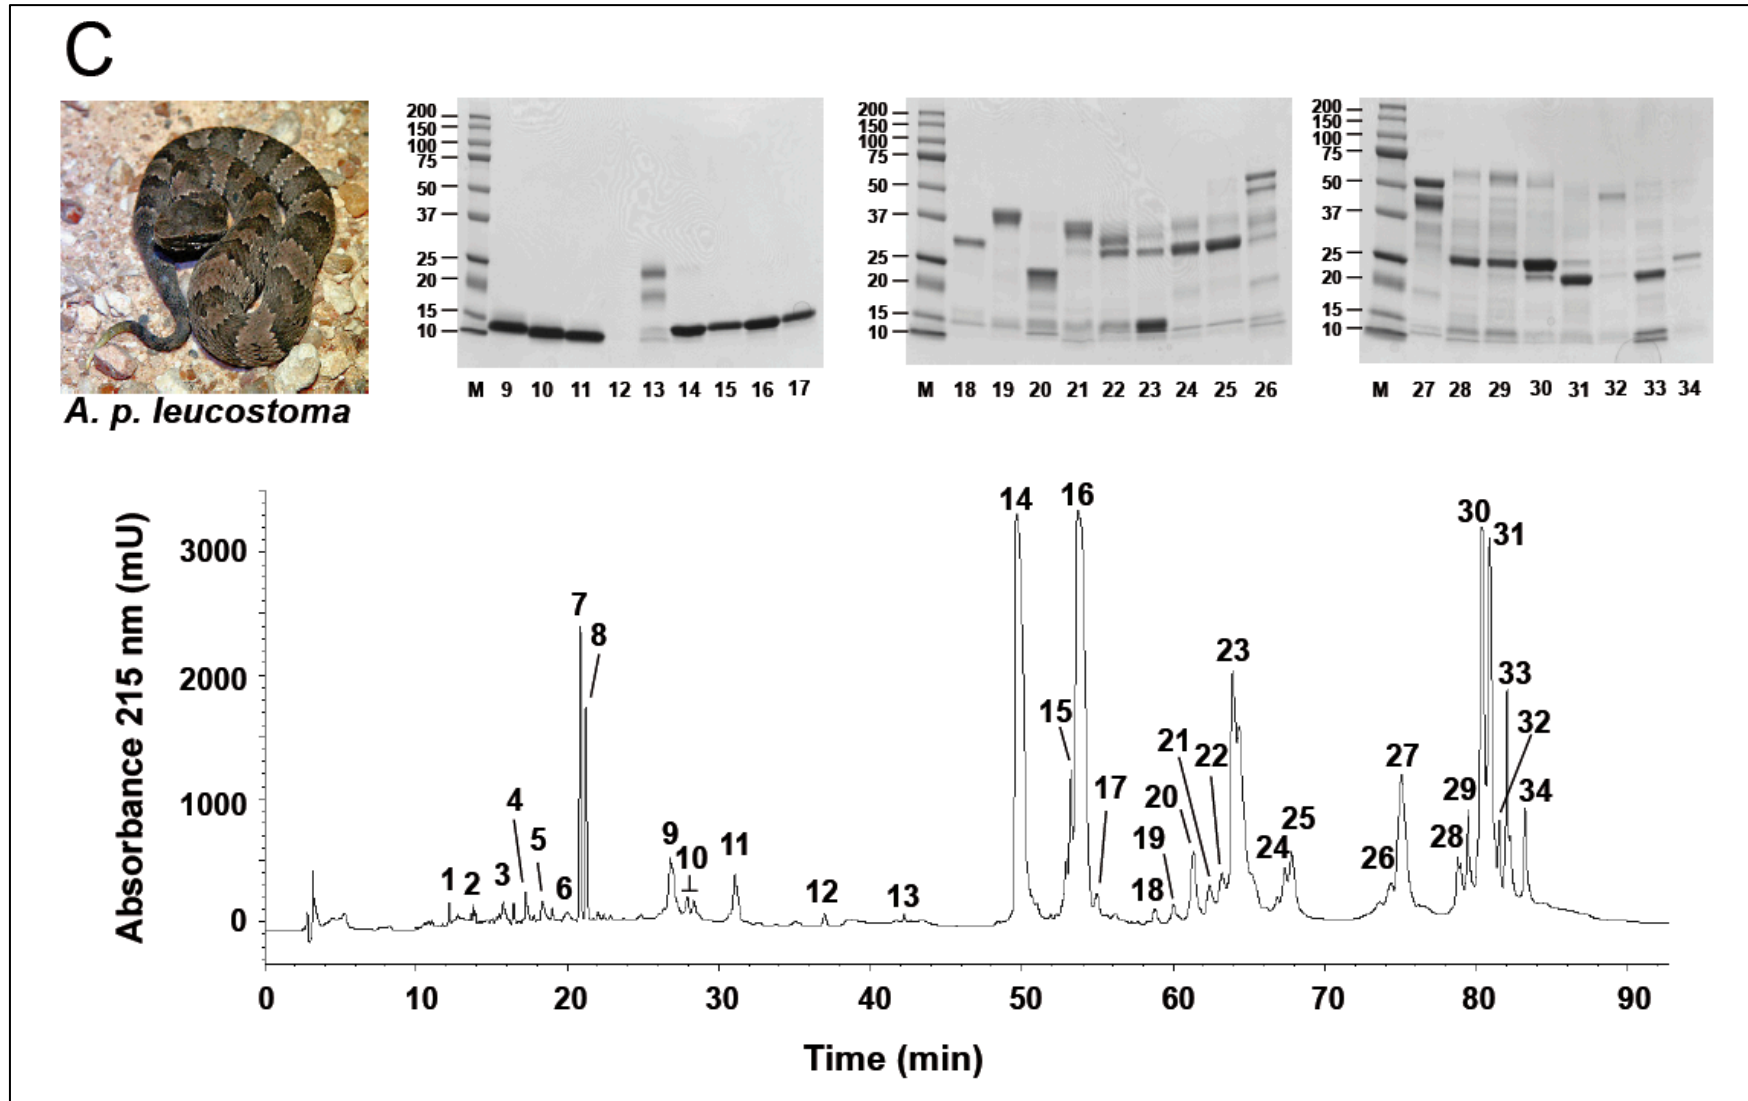

**Table S10:** Assignment of the RP-HPLC isolated fractions of *Agkistrodon contortrix leucostoma* venom to protein families by MALDI-TOF-TOF or nESI-MS-MS of selected peptide ions from in-gel trypsin-digested protein bands from the SDS-PAGE shown in Fig.4C. \* Cysteine residues are carbamidomethylated. X: Leu/Ile; B: Lys/Gln; Z, pyroglutamate (2-oxo-pyrrolidone carboxylic acid). <sup>ox</sup>: oxidized; <sup>da</sup>: deamidated. Mass estimations by SDS-PAGE (reducing conditions) are indicated in kDa. Confidence (Conf) and Score (Sc) values are calculated by the Paragon algorithm of ProteinPilot<sup>®</sup>.

| Peak | %   | Mass, kDa | Peptide ion |   | MS/MS-derived or N-terminal (Nt) sequence | Conf (%) | Sc | Protein family; ~ related protein *                                                                                                           |
|------|-----|-----------|-------------|---|-------------------------------------------|----------|----|-----------------------------------------------------------------------------------------------------------------------------------------------|
|      |     |           | m/z         | z |                                           |          |    |                                                                                                                                               |
| 1    | 0.2 | -         | 385.3       | 1 | TPPA                                      | -        | -  | Bradykinin-inhibitory peptide; P85025<br>Fragment of NGF- $\beta$ ; ACC85799                                                                  |
|      |     |           | 470.2       | 1 | ZSPR                                      |          |    |                                                                                                                                               |
| 2    | 0.2 | -         | 440.2       | 1 | PARP                                      | -        | -  | Fragment of 3FTx; ~ ABG27005                                                                                                                  |
| 3    | 0.5 | -         | 603.4       | 1 | DHPPH                                     | -        | -  | Fragment of NGF- $\beta$ ; ACC85799<br>Fragment of NGF- $\beta$ ; ACC85799<br>Bradykinin-inhibitory peptide; P85025<br>SVMP inhibitor; P01021 |
|      |     |           | 506.4       | 1 | HDPH                                      |          |    |                                                                                                                                               |
|      |     |           | 539.3       | 1 | TAGP                                      |          |    |                                                                                                                                               |
|      |     |           | 449.3       | 1 | ZBW <sup>kyn</sup>                        |          |    |                                                                                                                                               |
| 4    | 0.4 | -         | 398.8       | 2 | BVTPVPR                                   | -        | -  | Fragment of PI-SVMP; ACV83930                                                                                                                 |
| 5    | 0.4 | -         | 865.4       | 1 | PAGPDVGPR                                 | -        | -  | Bradykinin-inhibitory peptide; P85025<br>Bradykinin-inhibitory peptide; P85025<br>Bradykinin-inhibitory peptide; P85025                       |
|      |     |           | 481.7       | 2 | PPAGPDVGPR                                |          |    |                                                                                                                                               |
|      |     |           | 532.3       | 2 | TPPAGPDVGPR                               |          |    |                                                                                                                                               |
| 6    | 0.3 | -         | 519.7       | 2 | RPPHPBXPP                                 | -        | -  | Bradykinin-potentiating peptide; ~ P85167                                                                                                     |
| 7    | 2.2 | -         | 452.1       | 1 | ZNW +Na                                   | -        | -  | SVMP inhibitor; P01021<br>SVMP inhibitor; P01021<br>SVMP inhibitor; P01021                                                                    |
|      |     |           | 430.1       | 1 | ZNW                                       |          |    |                                                                                                                                               |
|      |     |           | 449.3       | 1 | ZNW <sup>kyn</sup>                        |          |    |                                                                                                                                               |
| 8    | 1.7 | -         | 444.1       | 1 | ZBW                                       | -        | -  | SVMP inhibitor; P01021<br>SVMP inhibitor; P01021                                                                                              |
|      |     |           | 466.1       | 1 | ZBW + Na                                  |          |    |                                                                                                                                               |
| 9    | 2.2 | 10        | 2023.0      | 1 | XRPGABCAEGXCCDBCK                         | 99       | 12 | Disintegrin; ~ P16338                                                                                                                         |
|      |     |           | 2097.0      | 1 | ARGDDVNDYCNXSAGCPR                        |          |    |                                                                                                                                               |
| 10   | 1.1 | 10        | 1968.0      | 1 | XTPGABCAEGXCCDBCK                         | 99       | 13 | Disintegrin; ~ P16338                                                                                                                         |
|      |     |           | 1869.9      | 1 | GDDVNDYCNXSAGCPR                          |          |    |                                                                                                                                               |
|      |     |           | 2097.1      | 1 | ARGDDVNDYCNXSAGCPR                        |          |    |                                                                                                                                               |
|      |     |           | 2084.1      | 1 | ABGDDXDDYCNXSAGCPR                        |          |    |                                                                                                                                               |
| 11   | 1.4 | 10        | 1196.5      | 1 | NPCCDAATCK                                | 99       | 10 | Disintegrin; ~ C9E1S1                                                                                                                         |
|      |     |           | 2023.0      | 1 | XRPGABCAEGXCCDBCK                         |          |    |                                                                                                                                               |
|      |     |           | 2084.0      | 1 | ABGDDXDDYCNXSAGCPR                        |          |    |                                                                                                                                               |
| 12   | 0.2 | -         | -           | - | unknown                                   | -        | -  | -                                                                                                                                             |

|     |      |    |        |   |                              |      |    |                                              |
|-----|------|----|--------|---|------------------------------|------|----|----------------------------------------------|
| 13a | 0.2  | 21 | 1620.8 | 1 | XXEVGEECDGSPR                | 99   | 13 | Disintegrin; ~ O42138                        |
|     |      |    | 1853.9 | 1 | NGHPCXNDNGYCYNR              | 99   | 14 |                                              |
| 13b |      | 18 | 1812.8 | 1 | BGABCAEGXCCDBCR              | 99   | 10 | Disintegrin; ~ Q9DGB9                        |
|     |      |    | 1203.5 | 1 | NNNGYCYNGK                   | 99   | 10 |                                              |
|     |      |    | 1137.5 | 1 | E <sup>py</sup> GNHYGYCR     | 98.7 | 10 |                                              |
|     |      |    | 1025.5 | 1 | FBGAGTECR                    | 98.7 | 9  |                                              |
|     |      |    | 1368.7 | 1 | XYCFPNSPENK                  | 95.4 | 9  |                                              |
| 13c |      | 11 | 1505.6 | 1 | CCFVHDCCYGK                  | 97.9 | 7  | Phospholipase A <sub>2</sub> , D49; ~ Q9PVF2 |
| 14  | 14.6 | 11 | 2060.0 | 1 | NAXTSYGSYGCNCGWGHR           | 99   | 9  | Phospholipase A <sub>2</sub> , K49; ~ P49121 |
| 15  | 2.6  | 11 | 1505.6 | 1 | CCFVHDCCYGK                  | 99   | 8  | Phospholipase A <sub>2</sub> , D49; ~ P51972 |
| 16  | 16.1 | 12 | 2316.1 | 1 | SGMXWYSAYGCYCGWGGBGR         | 99   | 10 | Phospholipase A <sub>2</sub> , D49; ~ P51972 |
|     |      |    | 2541.2 | 1 | SGMXWYSAYGCYCGWGGBGRPK       | 99   | 13 |                                              |
| 17  | 1.1  | 14 | 2316.0 | 1 | SGMXWYSAYGCYCGWGGBGR         | 99   | 8  | Phospholipase A <sub>2</sub> , D49; ~ P51972 |
|     |      |    | 2541.1 | 1 | SGMXWYSAYGCYCGWGGBGRPK       | 94.6 | 8  |                                              |
| 18a | 0.4  | 29 | 1526.8 | 1 | XXGGDECNXNEHR                | 99   | 8  | Serine proteinase; ~ Q7T229                  |
|     |      |    | 1683.0 | 1 | TYTBWDBDXMXXR                | 99   | 12 |                                              |
|     |      |    | 1129.7 | 1 | FXVAXYTFR                    | 97.9 | 10 |                                              |
| 18b | 0.1  | 13 | -      | - | unknown                      | -    | -  | -                                            |
| 19a | 0.5  | 37 | 1189.7 | 1 | WDBDXMXXR                    | 81.5 | 6  | Serine proteinase; ~ Q9PSN3                  |
| 19b | 0.1  | 12 | 1505.7 | 1 | CCFVHDCCYGK                  | 86.2 | 6  | Phospholipase A <sub>2</sub> , D49; ~ Q9PVF2 |
| 20a | 2.0  | 22 | 3023.6 | 1 | SVDFDSESPRBPEXBNBXVDXHNSXR   | 99   | 10 | CRISP; ~ Q7ZTA0                              |
|     |      |    | 1537.7 | 1 | MEWYPEAAAANAER               | 99   | 14 |                                              |
|     |      |    | 2446.4 | 1 | YGXGADPPNAVXGHFTBXVWYK       | 99   | 13 |                                              |
| 20b |      | 17 | 1620.8 | 1 | WTEXXHAWHGENK                | 99   | 14 | CRISP; ~ Q7ZTA0                              |
|     |      |    | 1537.7 | 1 | MEWYPEAAAANAER               | 99   | 12 |                                              |
| 20c | 0.2  | 12 | -      | - | unknown                      | -    | -  | -                                            |
| 20d |      | 10 | 1904.1 | 1 | BPEXBNBXVDXHNSXR             | 99   | 9  | CRISP; ~ Q7ZTA0                              |
|     |      |    | 1537.8 | 1 | MEWYPEAAAANAER               | 99   | 10 |                                              |
|     |      |    | 1620.9 | 1 | WTEXXHAWHGENK                | 98.9 | 8  |                                              |
| 21a | 1.0  | 33 | 1625.8 | 1 | XVXGGDECNXNEHR               | 99   | 11 | Serine proteinase; ~ P09872                  |
|     |      |    | 2036.1 | 1 | GXAATTXCAGXXEGGBDTCK         | 99   | 15 |                                              |
|     |      |    | 1088.6 | 1 | XYXGMHNXK                    | 99   | 11 |                                              |
|     |      |    | 2856.5 | 1 | GDSGGPXXCNGBFBGXXSVGGNPCABPR | 99   | 18 |                                              |
|     |      |    | 1512.7 | 1 | VXGGDECNXNEHR                | 99   | 11 |                                              |
|     |      |    | 2260.2 | 1 | NSAHXAPXSXPSNPPSVGSVCR       | 99   | 23 |                                              |
| 21b | 0.2  | 12 | -      | - | unknown                      | -    | -  | -                                            |

|     |     |    |        |   |                                                          |      |    |                                             |
|-----|-----|----|--------|---|----------------------------------------------------------|------|----|---------------------------------------------|
| 22a | 1.8 | 30 | 2867.6 | 1 | FXAXVYAN <sup>da</sup> GSXCGGTXXNBEWVXTAR                | 99   | 13 | Serine proteinase; ~ P09872                 |
| 22b |     | 27 | 2889.8 | 1 | XDSPVSNSEHXAPXSPSSPPSVGSVCR                              | 99   | 9  | Serine proteinase; ~ ADP88561               |
| 22c | 0.1 | 12 | -      | - | unknown                                                  | -    | -  | -                                           |
| 23a | 0.5 | 31 | -      | - | unknown                                                  | -    | -  | -                                           |
| 23b | 3.0 | 29 | 1498.7 | 1 | VVGGDECXNEHR                                             | 99   | 10 | Serine proteinase; ~ Q91053                 |
|     |     |    | 1824.0 | 1 | XAPXSPSSPPSVGSVCR                                        | 99   | 14 |                                             |
|     |     |    | 1190.7 | 1 | XMGWGTXSPTK                                              | 99   | 14 |                                             |
|     |     |    | 1307.7 | 1 | NFBMXFGVHSK                                              | 99   | 18 |                                             |
|     |     |    | 2889.6 | 1 | XDSPVSNSEHXAPXSPSSPPSVGSVCR                              | 99   | 21 |                                             |
|     |     |    | 1323.7 | 1 | NFBM <sup>ox</sup> XFGVHSK                               | 95.5 | 8  |                                             |
| 23c | 8.7 | 12 | 1505.6 | 1 | CCFVHDCCYGK                                              | 99   | 14 | Phospholipase A <sub>2</sub> ,D49; ~ Q7SID6 |
|     |     |    | 1368.7 | 1 | N <sup>da</sup> XMBFETXXMK                               | 99   | 18 |                                             |
|     |     |    | 2577.2 | 1 | TDSYTYSBENGDVVCGGDD <sup>da</sup> PCBK                   | 99   | 16 |                                             |
| 24a | 0.2 | 34 | 1512.7 | 1 | VXGGDECXNEHR                                             | 99   | 10 | Serine proteinase; ~ O13063                 |
|     |     |    | 1858.0 | 1 | YSXCR <sup>or</sup> AVYXGMPVBSR                          | 99   | 14 |                                             |
| 24b | 1.0 | 27 | 3465.9 | 1 | SXAXVYXTSGFXCGGTXXNBEWVXTAAHCDR                          | 99   | 14 | Serine proteinase; ~ Q2QA04                 |
|     |     |    | 2919.6 | 1 | N <sup>da</sup> RSVRNSBH <sup>ox</sup> XAPXSPSSPPSVGSVCR | 99   | 9  |                                             |
| 24c | 0.2 | 12 | 1401.8 | 1 | GBAEVWXGXWDK                                             | 99   | 11 | C-type lectin/lectin-like; ~ Q9PSN0         |
|     |     |    | 1621.8 | 1 | XFDEXBAWEDAER                                            | 99   | 15 |                                             |
|     |     |    | 1241.6 | 1 | DFSWEWTDTR                                               | 99   | 12 |                                             |
| 25a | 0.3 | 36 | 2856.5 | 1 | GDSGGPXXCNGBFBGXXSVGGNPCABPR                             | 99   | 10 | Serine proteinase; ~ P09872                 |
| 25b | 1.7 | 28 | 1003.5 | 1 | DBDXMXXR                                                 | 99   | 10 | Serine proteinase; ~ Q91053                 |
|     |     |    | 1294.6 | 1 | XNXXDYEVCR                                               | 99   | 13 |                                             |
|     |     |    | 1512.6 | 1 | VXGGDECXNEHR                                             | 99   | 12 |                                             |
|     |     |    | 1639.7 | 1 | CANXNXXDYEVCR                                            | 99   | 17 |                                             |
|     |     |    | 1429.6 | 1 | SXPSSPPSVGSVCR                                           | 99   | 15 |                                             |
| 25c | 0.3 | 13 | 1572.8 | 1 | EFCVEXVSXTGYR                                            | 99   | 9  | C-type lectin/lectin-like; ~ Q9PSN0         |
|     |     |    | 1621.8 | 1 | XFDEXBAWEDAER                                            | 99   | 12 |                                             |
| 26a | 0.5 | 58 | 2347.3 | 1 | XYFAGEYTABFHGWXDSTXK                                     | 99   | 10 | L-amino acid oxidase; ~ P56742              |
| 26b | 0.4 | 49 | 2347.1 | 1 | XYFAGEYTABFHGWXDSTXK                                     | 99   | 14 | L-amino acid oxidase; ~ P56742              |
| 26c | 0.2 | 35 | 2260.3 | 1 | NSAHXAPXSPSNPPSVGSVCR                                    | 99   | 13 | Serine proteinase; ~ P09872                 |
| 26d | 0.2 | 30 | -      | - | unknown                                                  | -    | -  | -                                           |
| 26e | 0.1 | 20 | 2347.1 | 1 | XYFAGEYTABFHGWXDSTXK                                     | 97.3 | 9  | L-amino acid oxidase; ~ P56742              |
| 26f | 0.1 | 15 | -      | - | unknown                                                  | -    | -  | -                                           |
| 26g | 0.1 | 12 | 1594.8 | 1 | DBEDWYANXGPMR                                            | 99   | 10 | L-amino acid oxidase; ~ Q6STF1              |
|     |     |    | 1514.7 | 1 | ETDYEEFXEXAR                                             | 99   | 17 |                                             |



|     |     |    |        |   |                                 |      |    |                                     |
|-----|-----|----|--------|---|---------------------------------|------|----|-------------------------------------|
| 27a | 1.7 | 51 | 1594.8 | 1 | DBEDWYANXGPMR                   | 99   | 12 | L-amino acid oxidase; ~ Q6STF1      |
|     |     |    | 1514.7 | 1 | ETDYEEFXEXAR                    | 99   | 12 |                                     |
|     |     |    | 2347.2 | 1 | XYFAGEYTABFHGWXDSTXK            | 99   | 10 |                                     |
|     |     |    | 1380.7 | 1 | SAGBXYEESXRK                    | 98.4 | 8  |                                     |
| 27b | 2.2 | 41 | 1733.9 | 1 | MYDXVNVXTPXYHR                  | 99   | 12 | Metalloproteinase; ~ Q9DGB9         |
|     |     |    | 1025.5 | 1 | FBGAGTECR                       | 99   | 11 |                                     |
|     |     |    | 1812.7 | 1 | BGABCAEGXCCDBCR                 | 99   | 12 |                                     |
|     |     |    | 1712.7 | 1 | P <sup>ca</sup> ASSECDMADXCTGR  | 99   | 16 |                                     |
|     |     |    | 1269.6 | 1 | SAECTDRFBR                      | 97.9 | 10 |                                     |
| 27c | 0.1 | 37 | -      | - | unknown                         | -    | -  | -                                   |
| 27d | 0.6 | 35 | 985.6  | 1 | EHBAFXK                         | 99   | 10 | Metalloproteinase; ~ Q9DGB9         |
|     |     |    | 1733.9 | 1 | MYDXVNVXTPXYHR                  | 99   | 12 |                                     |
| 27e | 0.2 | 18 | -      | - | unknown                         | -    | -  | -                                   |
| 27f | 0.3 | 11 | 1621.8 | 1 | XFDEXBAWEDAER                   | 99   | 10 | C-type lectin/lectin-like; ~ Q9PSN0 |
| 28a | 0.3 | 57 | 1699.9 | 1 | NBCXYFFGPNAAVAK                 | 99   | 9  | Metalloproteinase; ~ O42138         |
| 28b | 1.3 | 24 | 3337.7 | 1 | XSHDNABXXTSTDFDGPTXGXAYVGTMCDPK | 99   | 13 | Metalloproteinase; ~ Q92032         |
|     |     |    | 3080.7 | 1 | YMYXDXSXAGVEXWSNBDXXDVBPAAAR    | 99   | 16 |                                     |
|     |     |    | 1532.7 | 1 | HTXDSFGWEWRER                   | 99   | 14 |                                     |
|     |     |    | 1247.6 | 1 | HTXDSFGEWR                      | 99   | 16 |                                     |
|     |     |    | 1067.5 | 1 | YNGDSDBXR                       | 98.9 | 9  |                                     |
| 28c | 0.3 | 11 | -      | - | unknown                         | -    | -  | -                                   |
| 28d | 0.3 | 10 | 1247.6 | 1 | HTXDSFGEWR                      | 99   | 13 | Metalloproteinase; ~ Q92032         |
|     |     |    | 3080.7 | 1 | YMYXDXSXAGVEXWSNBDXXDVBPAAAR    | 84.5 | 6  |                                     |
| 29a | 0.5 | 55 | 1699.9 | 1 | NBCXYFFGPNAAVAK                 | 99   | 11 | Metalloproteinase; ~ O42138         |
| 29b | 0.8 | 24 | 1401.7 | 1 | BWVHBMVNTMK                     | 99   | 13 | Metalloproteinase; ~ Q92032         |
|     |     |    | 3096.7 | 1 | YMYXDXSXAGVEXWSNBDXXDVBPAAAR    | 99   | 14 |                                     |
|     |     |    | 3337.7 | 1 | XSHDNABXXTSTDFDGPTXGXAYVGTMCDPK | 99   | 13 |                                     |
|     |     |    | 1247.6 | 1 | HTXDSFGEWR                      | 99   | 13 |                                     |
|     |     |    | 3080.7 | 1 | YMYXDXSXAGVEXWSNBDXXDVBPAAAR    | 99   | 13 |                                     |
|     |     |    | 1532.8 | 1 | HTXDSFGWEWRER                   | 99   | 12 |                                     |
| 29c | 0.3 | 11 | -      | - | unknown                         | -    | -  | -                                   |
| 29d | 0.2 | 10 | 1247.6 | 1 | HTXDSFGEWR                      | 99   | 11 | Metalloproteinase; ~ Q92032         |
| 30a | 0.4 | 52 | -      | - | unknown                         | -    | -  | -                                   |
| 30b | 5.3 | 24 | 1735.9 | 1 | VAVTMAHEXGHNXGMR                | 99   | 20 | Metalloproteinase; ~ P84907         |
|     |     |    | 1313.7 | 1 | YVEXVXVADHR                     | 99   | 13 |                                     |
| 30c | 2.4 | 21 | 1313.8 | 1 | YXEXVVVADHR                     | 99   | 11 | Metalloproteinase; ~ Q9IAB0         |

|     |     |    |        |   |                          |      |    |                             |
|-----|-----|----|--------|---|--------------------------|------|----|-----------------------------|
|     |     |    | 2564.4 | 1 | XSHDNABXXTAXEXDGETXGXANR | 99   | 16 |                             |
| 31a | 0.7 | 24 | -      | - | unknown                  | -    | -  | -                           |
| 31b | 5.0 | 20 | 1083.5 | 1 | NPBCXXNBP                | 99   | 12 | Metalloproteinase; ~ Q92031 |
|     |     |    | 1576.6 | 1 | SVSHDTXASFGNWR           | 99   | 17 |                             |
|     |     |    | 2347.0 | 1 | BDXXTVTSVSHDTXASFGNWR    | 99   | 17 |                             |
|     |     |    | 1313.6 | 1 | YVEXVXVADHR              | 99   | 15 |                             |
| 32  | 1.2 | 44 | 2663.1 | 1 | SECDXAESC TGBSAECPTDDFBR | 99   | 12 | Metalloproteinase; ~ C9E1S0 |
|     |     |    | 1494.6 | 1 | FSDCSRDEHWR              | 98.3 | 9  |                             |
| 33a | 2.1 | 21 | 2169.2 | 1 | SHDNABXXTAXVFDEGXXGR     | 99   | 13 | Metalloproteinase; ~ B7U492 |
| 33b | 1.0 | 12 | 2169.2 | 1 | SHDNABXXTAXVFDEGXXGR     | 99   | 7  | Metalloproteinase; ~ B7U492 |
| 33c | 0.8 | 10 | -      | - | unknown                  | -    | -  | -                           |
| 34  | 2.9 | 25 | 1313.8 | 1 | YVEXVXVADHR              | 99   | 7  | Metalloproteinase; ~ Q92043 |

---
